# Supplementary material for: Diastereoselective syntheses of 3-aryl-5-(arylalkyl)-6-methyl-1-(1-phenylethyl)thioxotetrahydropyrimidin-4(1H)-ones: A stereochemical perspective from endo and exocyclic chiral centres
Source: Royal Society of Chemistry journal article supplement (doi:10.1039/c0ob00230e), 2010-01-01
Supplement: c0ob00230e.pdf [file c0ob00230e.pdf]

# Diastereoselective syntheses of 3-aryl-5-(arylalkyl)-6-methyl-1-(1-phenylethyl)thioxotetrahydropyrimidin-4(1*H*)-ones: A stereochemical perspective from endo and exocyclic chiral centres

Varun Kumar<sup>a</sup>, Pallepogu Raghavaiah<sup>b</sup>, Shaikh M. Mobin<sup>c</sup> and Vipin A. Nair<sup>a\*</sup>

<sup>a</sup> Department of Medicinal Chemistry, National Institute of Pharmaceutical Education and Research, Sector 67, Mohali, Punjab 160 062, India;

<sup>b</sup> National Single Crystal X-ray Diffractometer Facility, School of Chemistry, University of Hyderabad, Hyderabad 500 046, India;

<sup>c</sup> National Single Crystal X-ray Diffraction Facility, Indian Institute of Technology Bombay, Powai, Mumbai 400 076, India.

E-mail: vn74nr@yahoo.com; Phone: 91-172-2292045

|                                                                                                                                              |                       |
|----------------------------------------------------------------------------------------------------------------------------------------------|-----------------------|
| <b>Table of contents</b>                                                                                                                     | <b>Page 1</b>         |
| <sup>1</sup> H and <sup>13</sup> C NMR spectra of <b>6a</b> to <b>6d</b> , <b>7a-9a</b> and <b>7b-9b</b>                                     | <b>Pages 2 to 11</b>  |
| <sup>1</sup> H and <sup>13</sup> C NMR spectra of <b>10</b> and <b>10a-10c</b>                                                               | <b>Pages 12 to 15</b> |
| <sup>1</sup> H and <sup>13</sup> C NMR spectra of <b>6ai-6dii</b>                                                                            | <b>Pages 16 to 21</b> |
| <sup>1</sup> H and <sup>13</sup> C NMR spectra of <b>7ai-9ai</b> and <b>7bii-9bii</b>                                                        | <b>Pages 22 to 30</b> |
| COSY, DEPT-135, HSQC and HMBC spectra of <b>6a</b> and <b>6b</b>                                                                             | <b>Pages 31 to 34</b> |
| COSY, DEPT-135, HSQC and HMBC spectra of <b>6ai</b> , <b>6bi</b> and <b>6bii</b>                                                             | <b>Pages 35 to 40</b> |
| Mass spectra of <b>6a-9a</b> , <b>6b-9b</b> , <b>6ai-9ai</b> , <b>6bi-9bi</b> and <b>6bii-9bii</b>                                           | <b>Pages 41 to 45</b> |
| ORTEP diagrams of <b>6a</b> , <b>6d</b> , <b>6ai</b> and <b>6di</b>                                                                          | <b>Pages 46 to 49</b> |
| <sup>1</sup> H NMR spectra of <b>6ai</b> , <b>6bi</b> and <b>6bii</b> (Me at C6 decoupled)                                                   | <b>Pages 50 to 51</b> |
| HRMS spectra of <b>6a-6d</b> , <b>7a-9a</b> , <b>7b-9b</b> , <b>6ai-6di</b> , <b>7ai-9ai</b> , <b>7bi-9bi</b> , <b>10</b> and <b>10a-10c</b> | <b>Pages 52 to 80</b> |
| Total energy for the different conformations <b>6a</b> and <b>6b</b> using PM3 Hamiltonion                                                   | <b>Page 81</b>        |

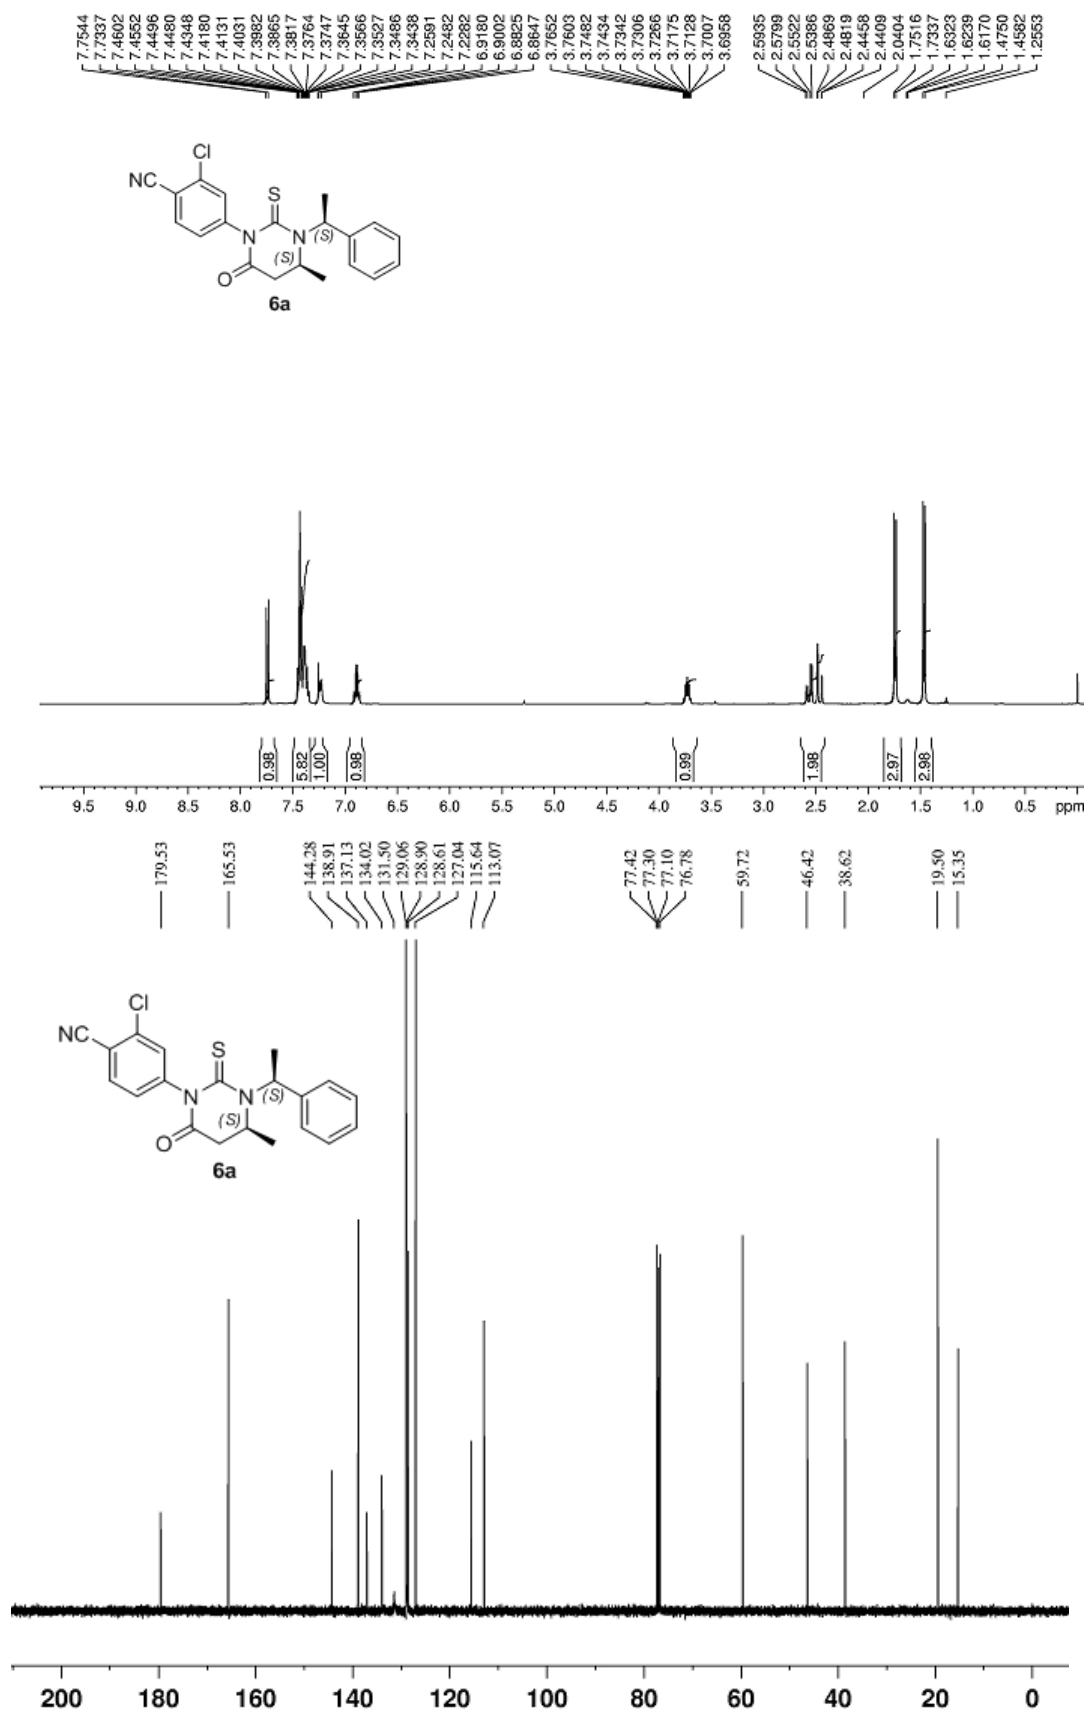

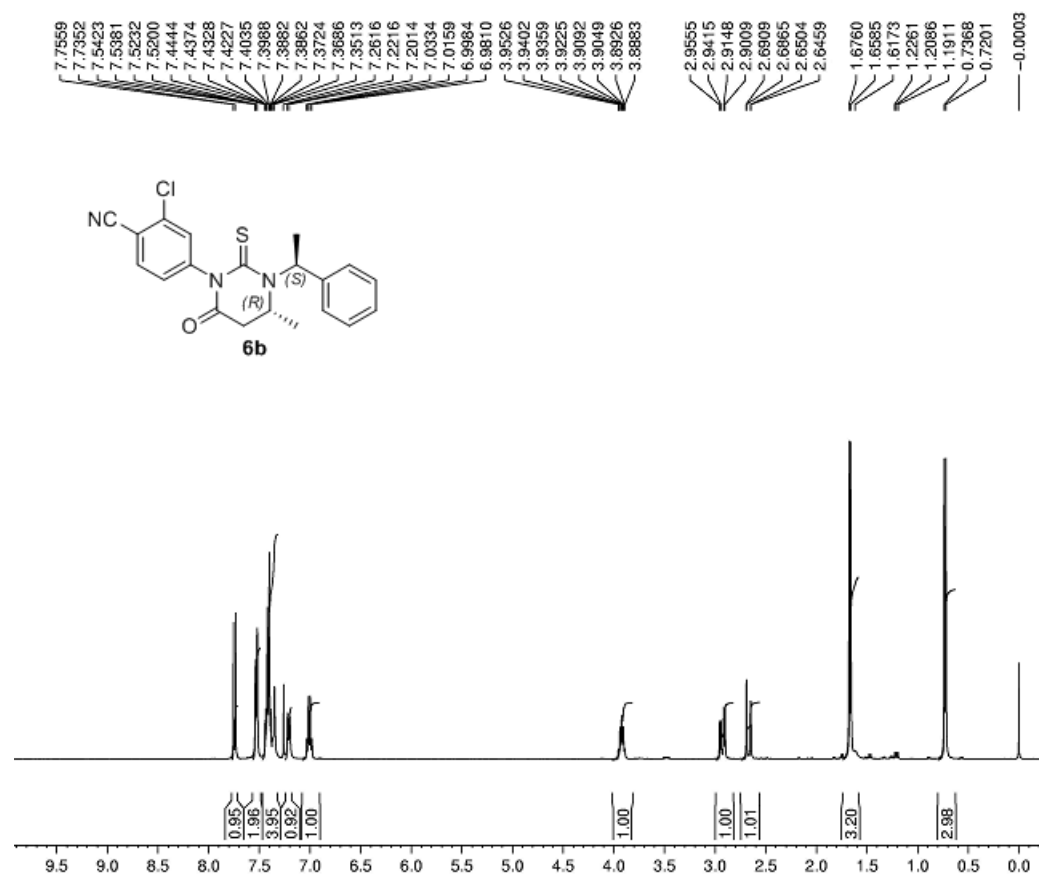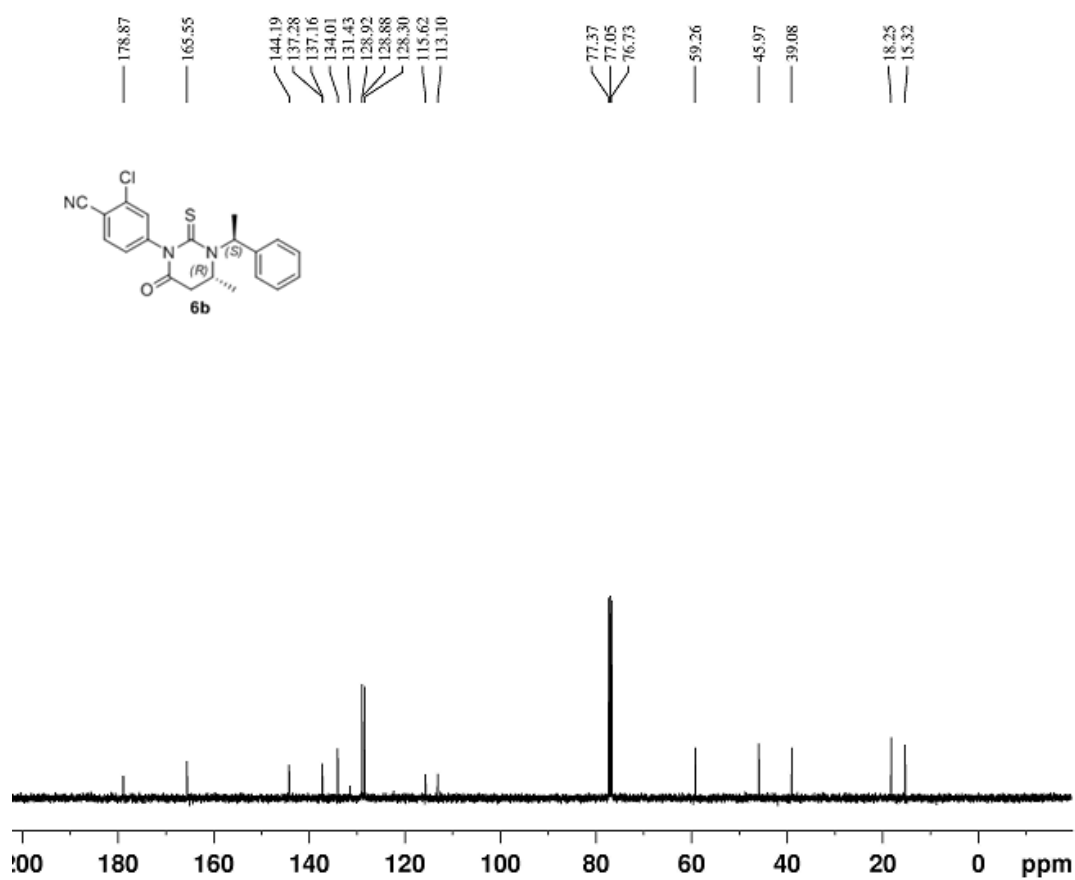

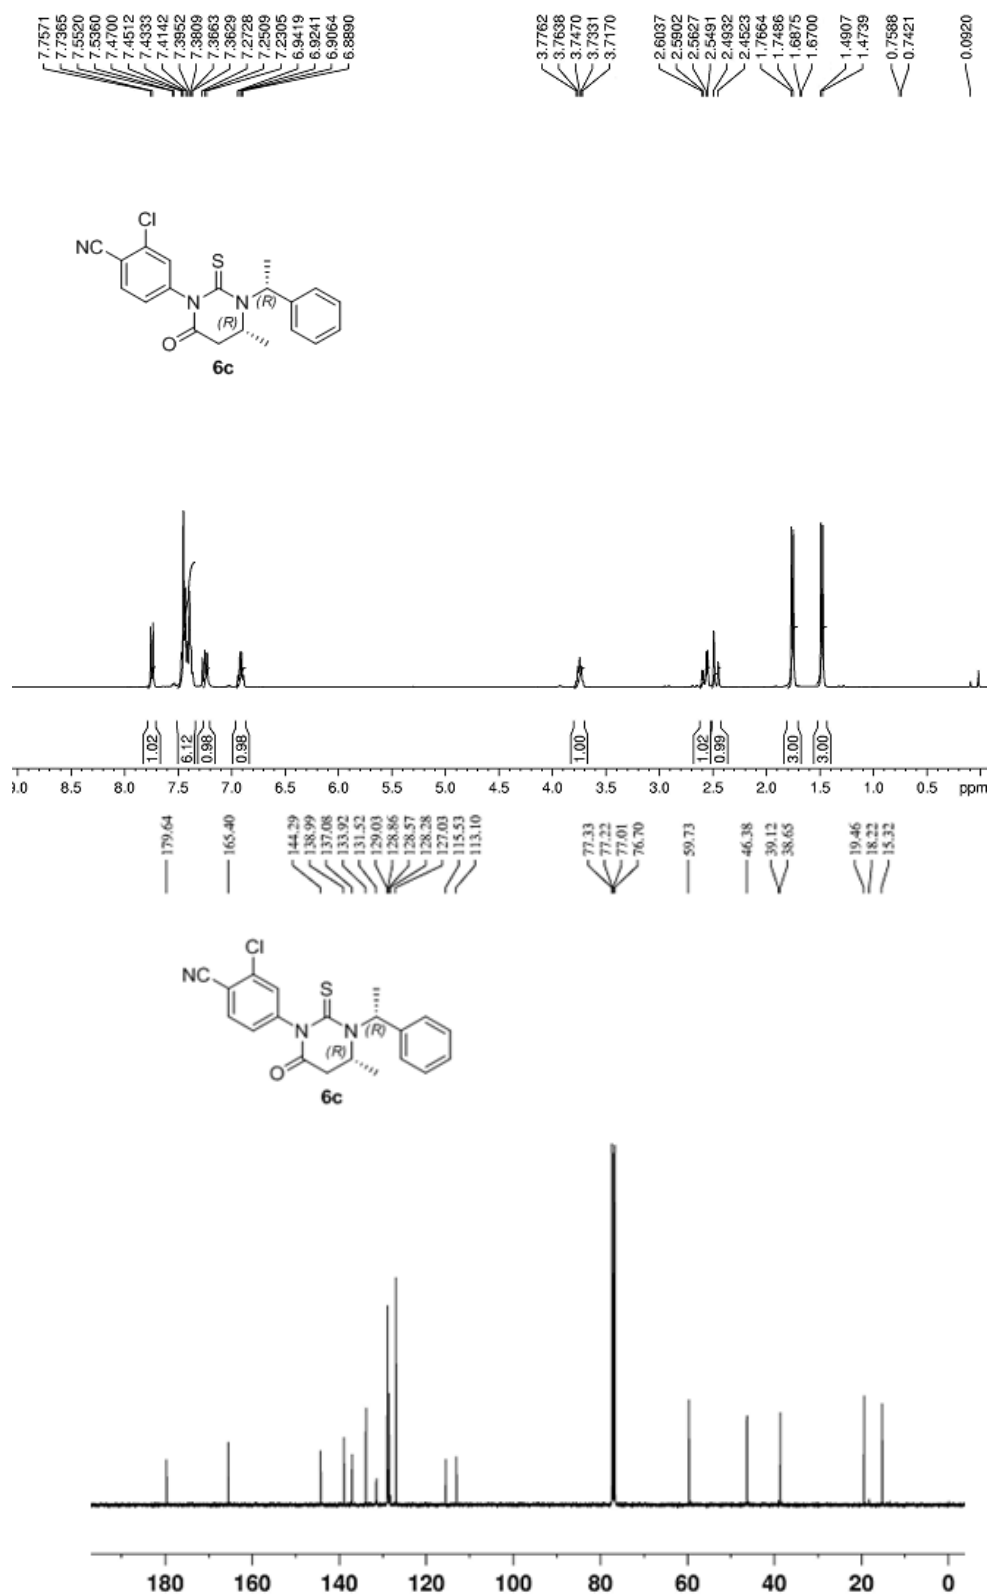

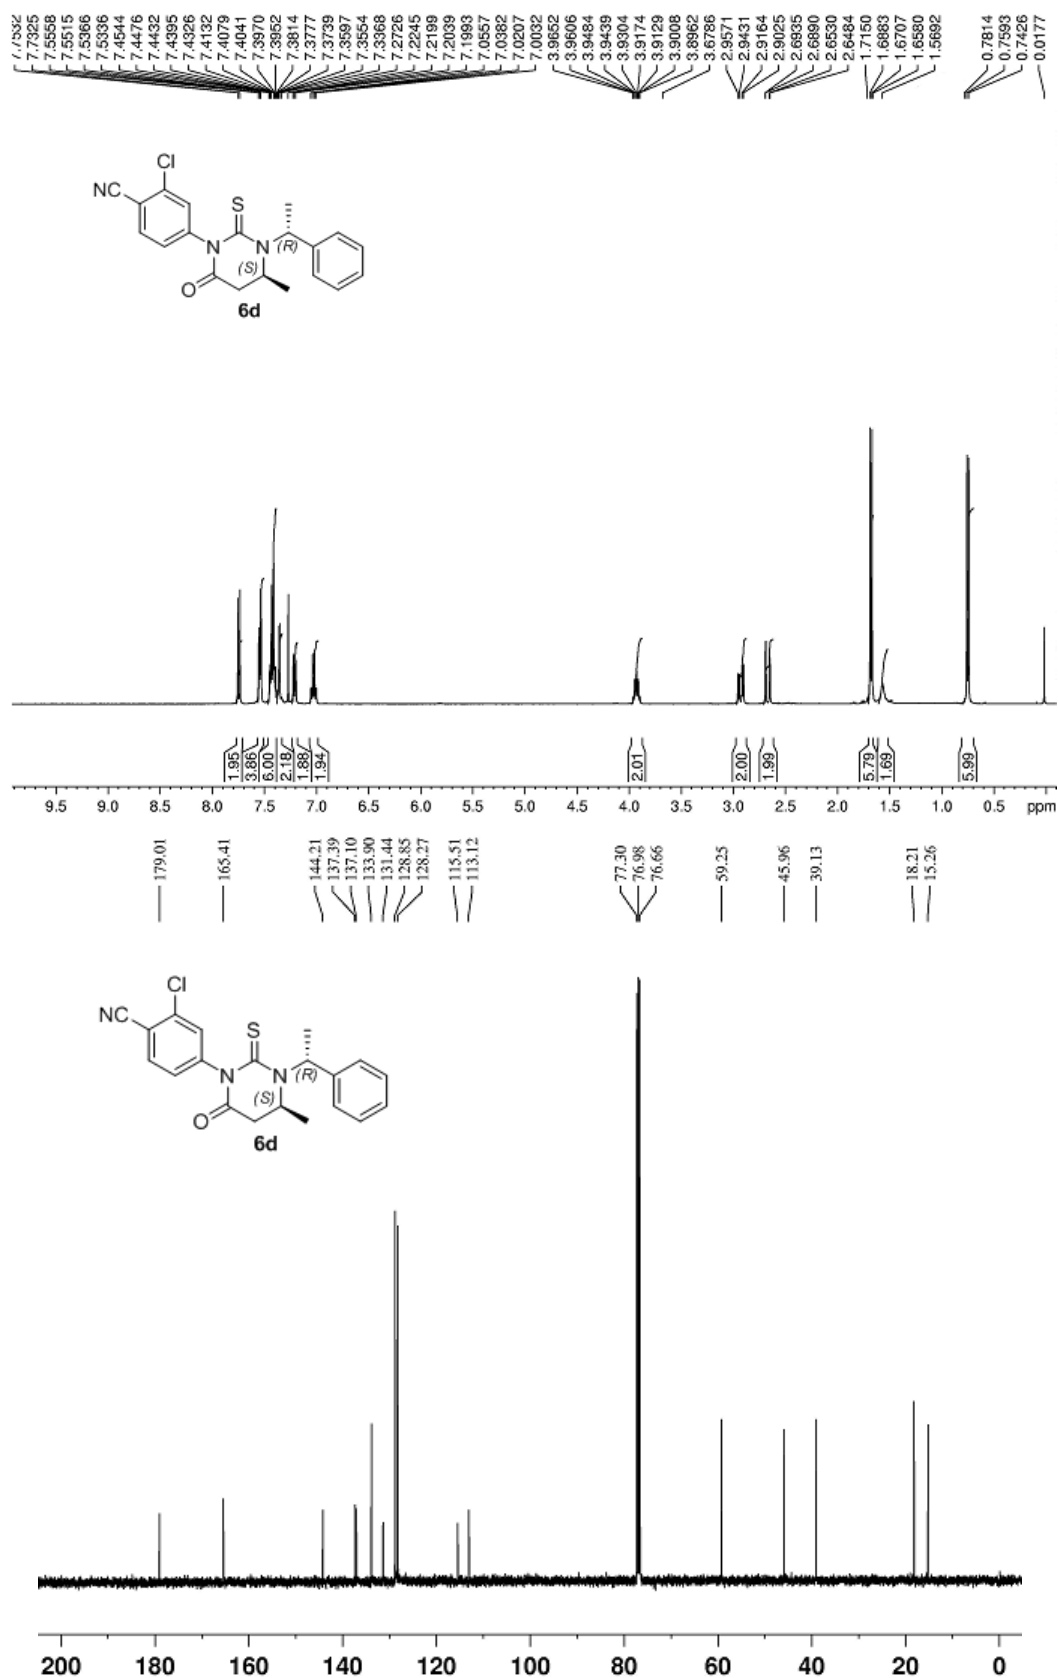

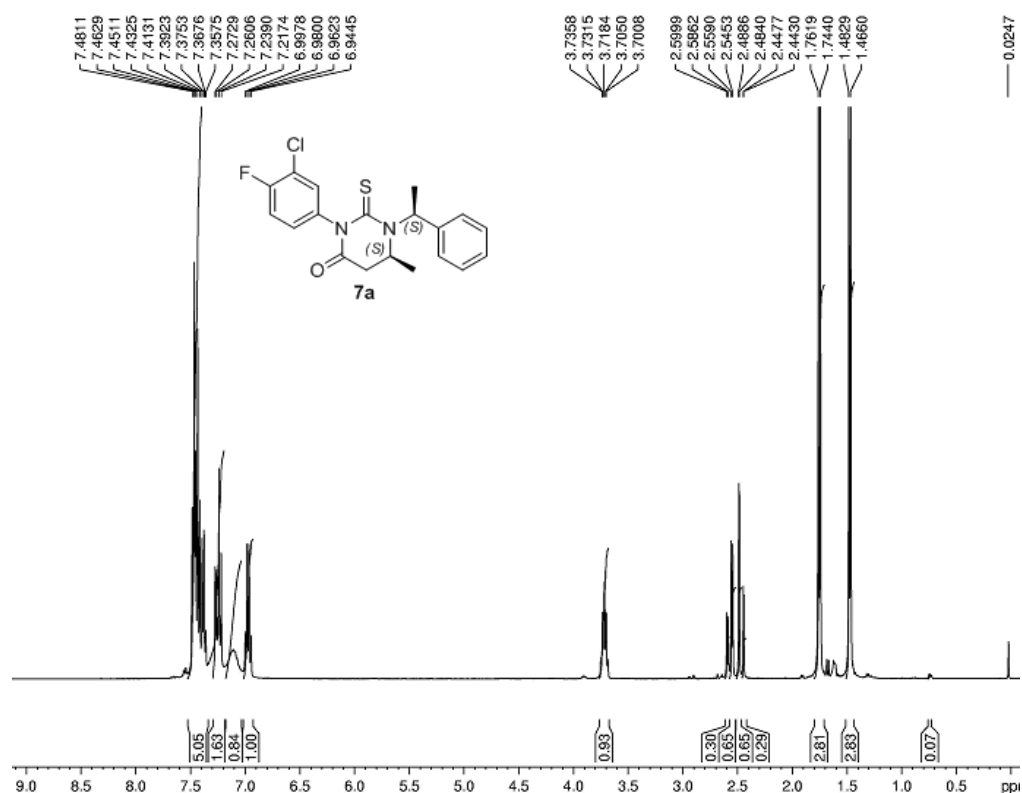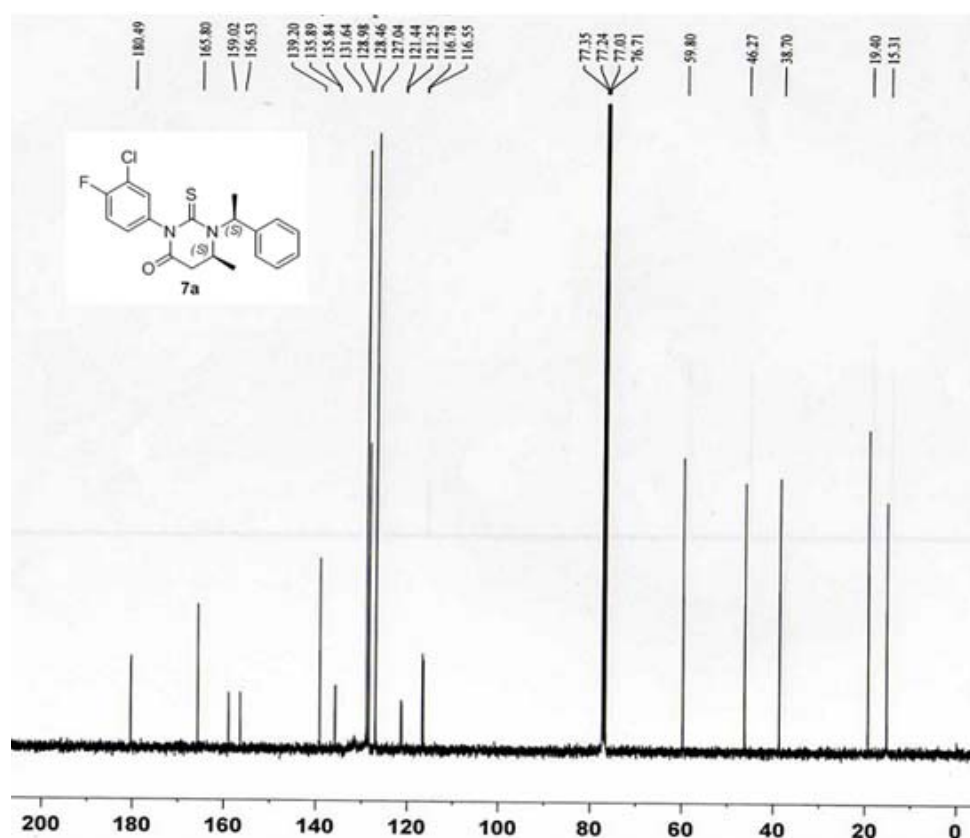

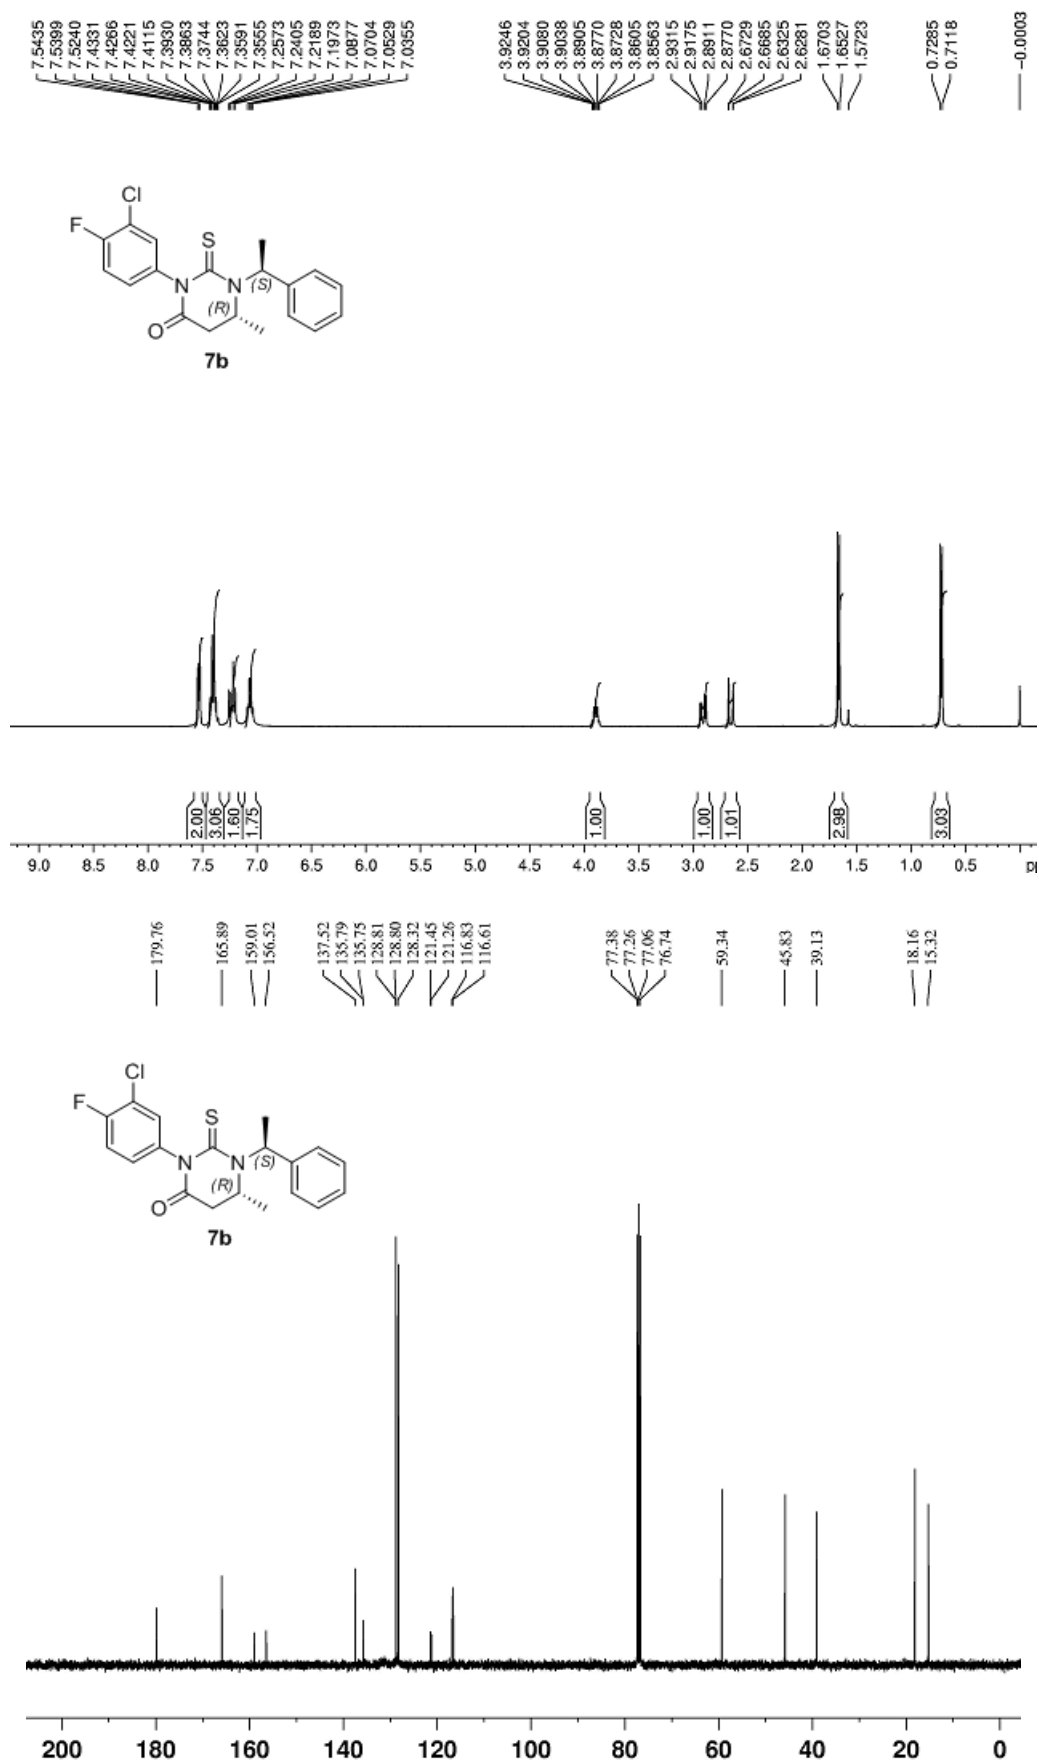

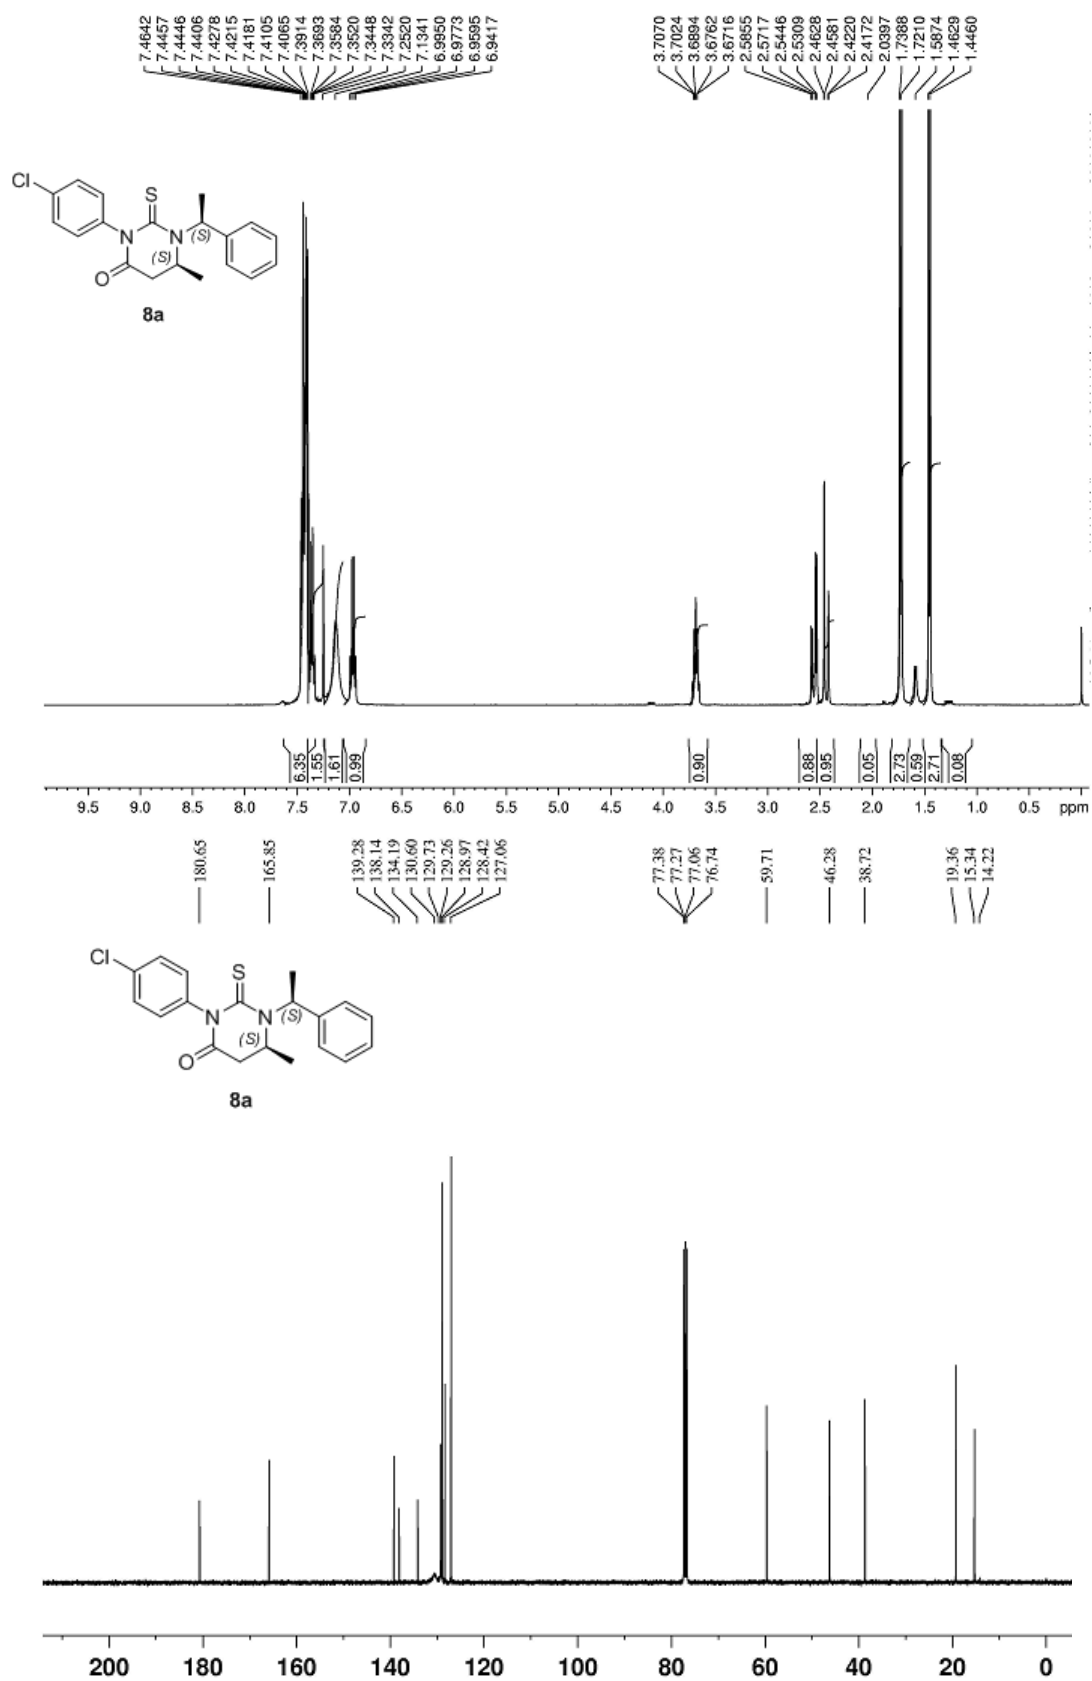



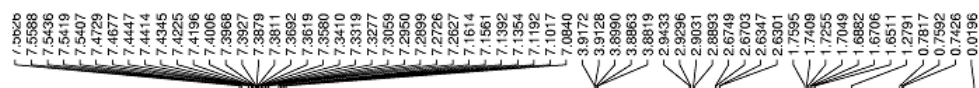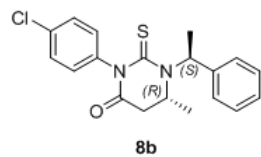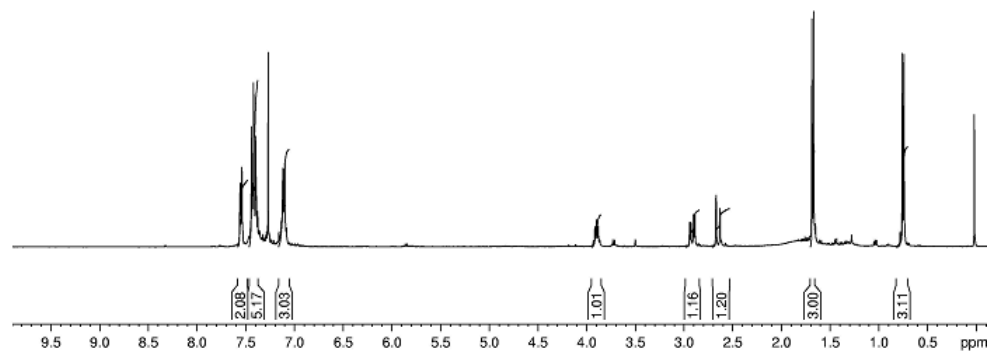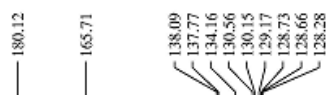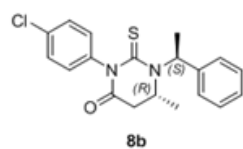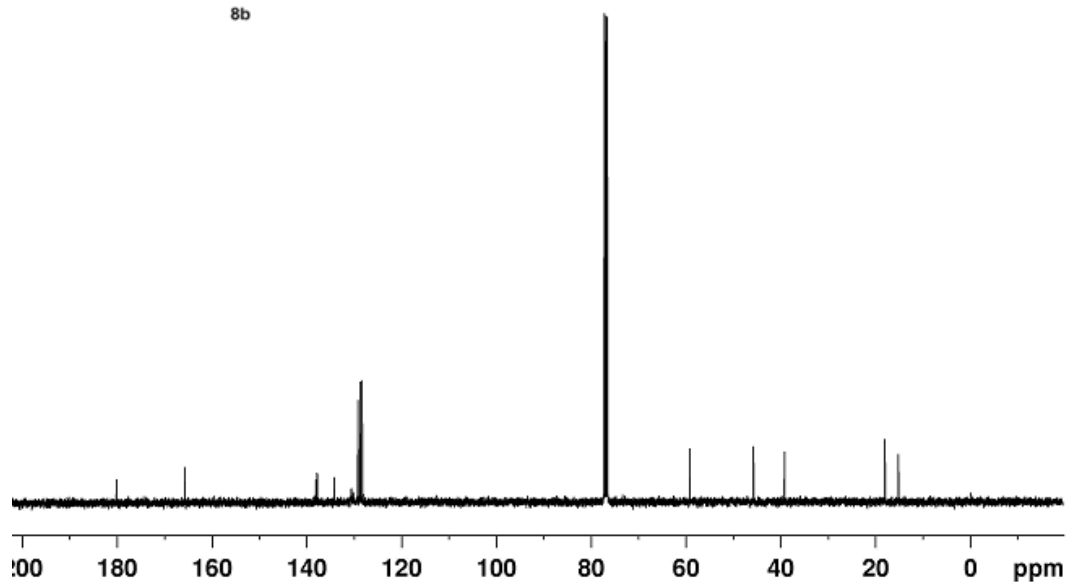

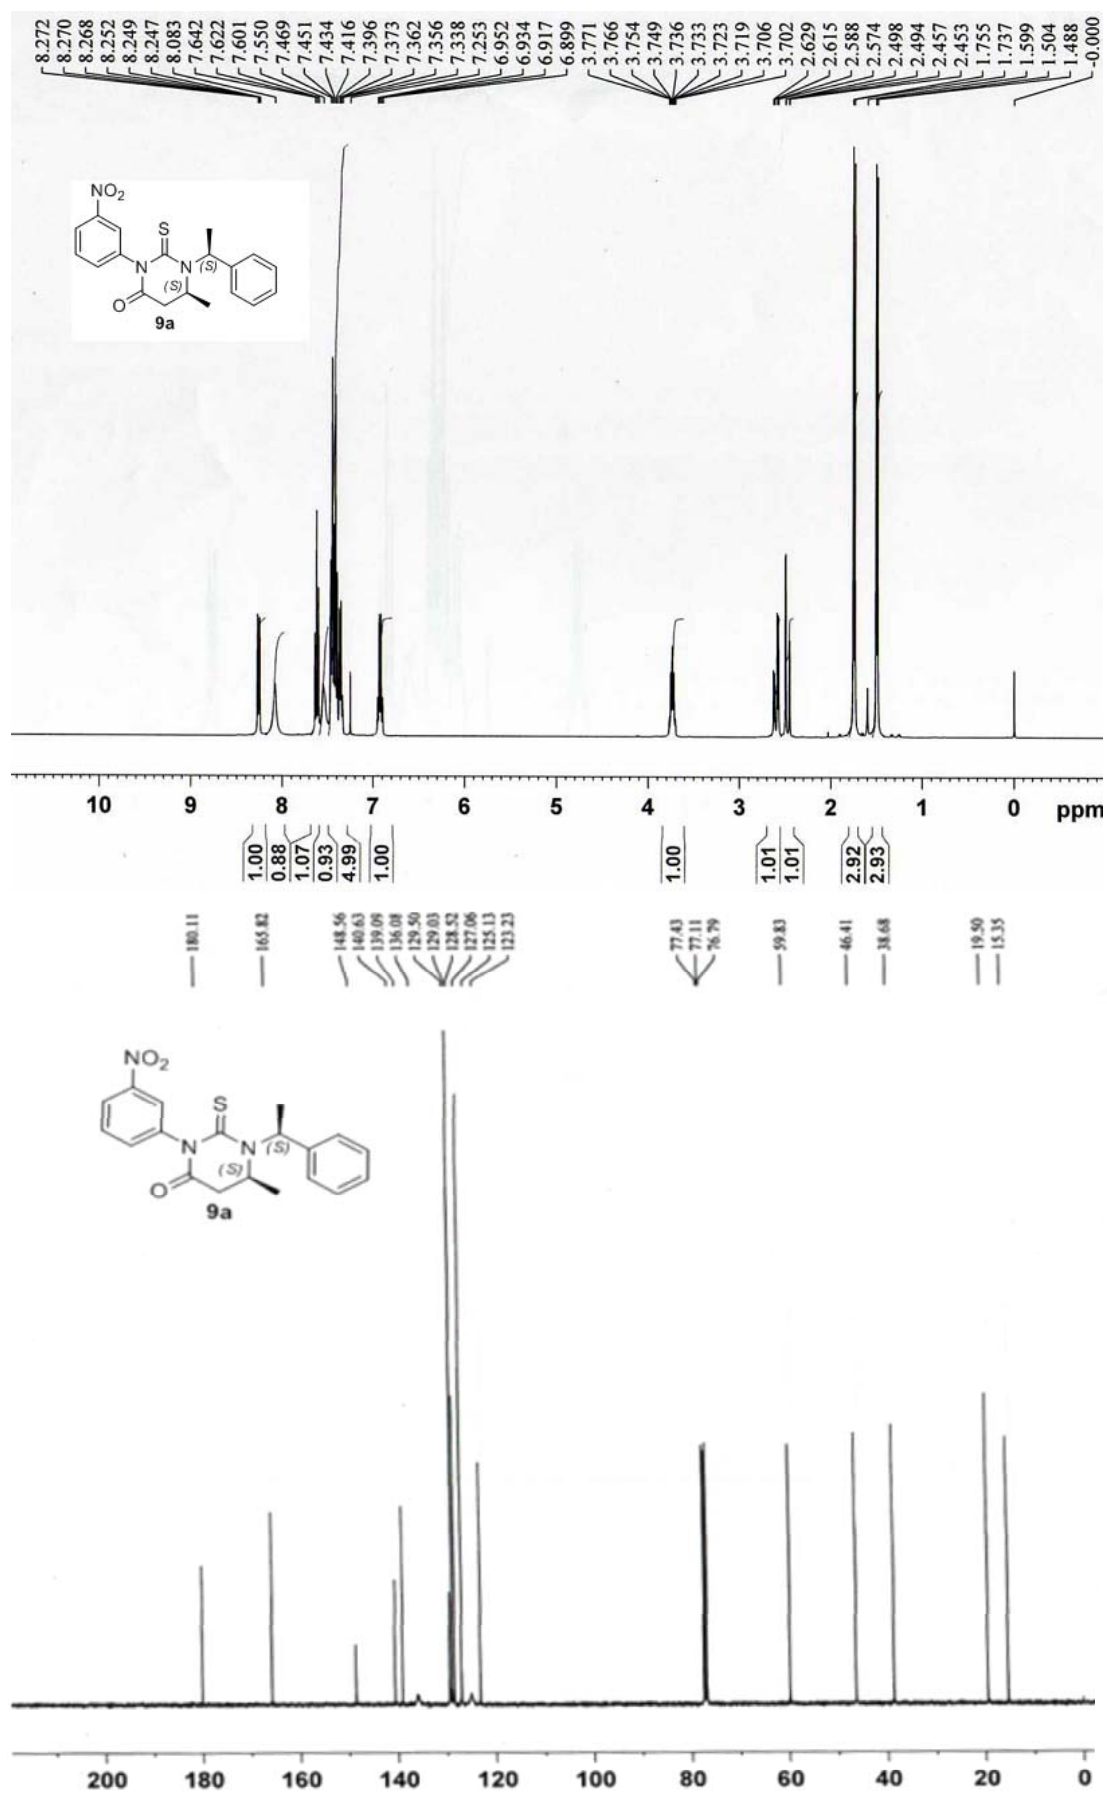

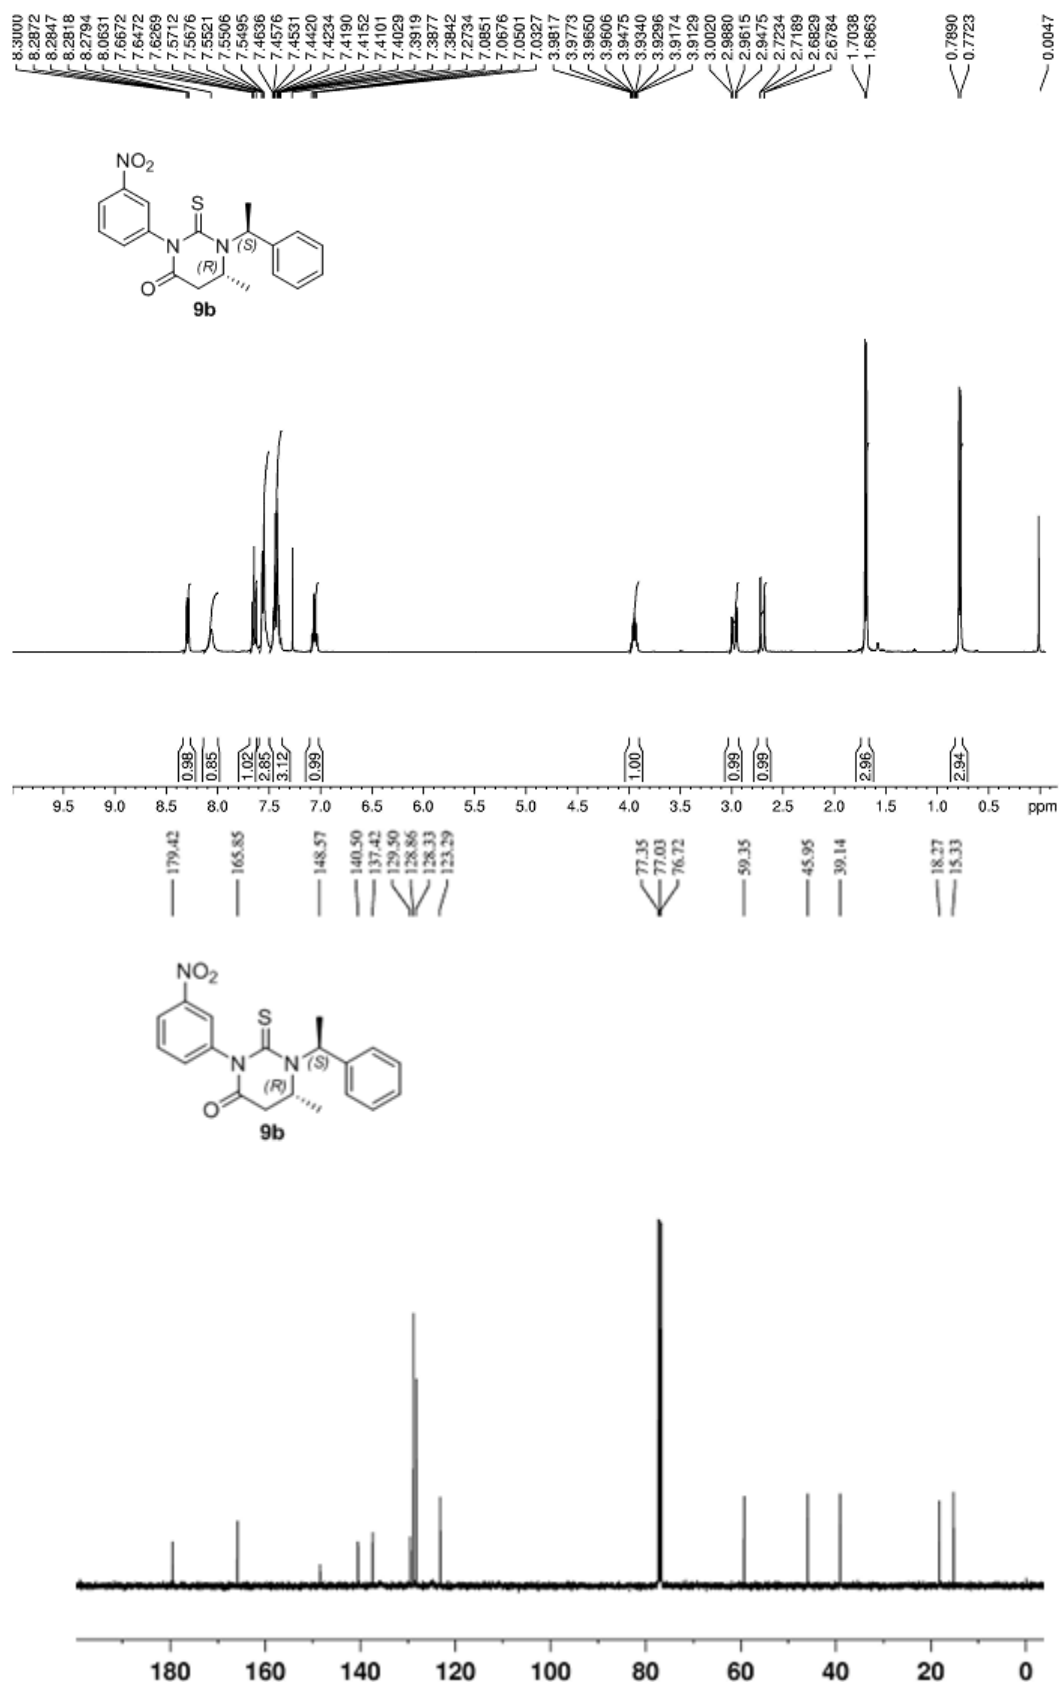

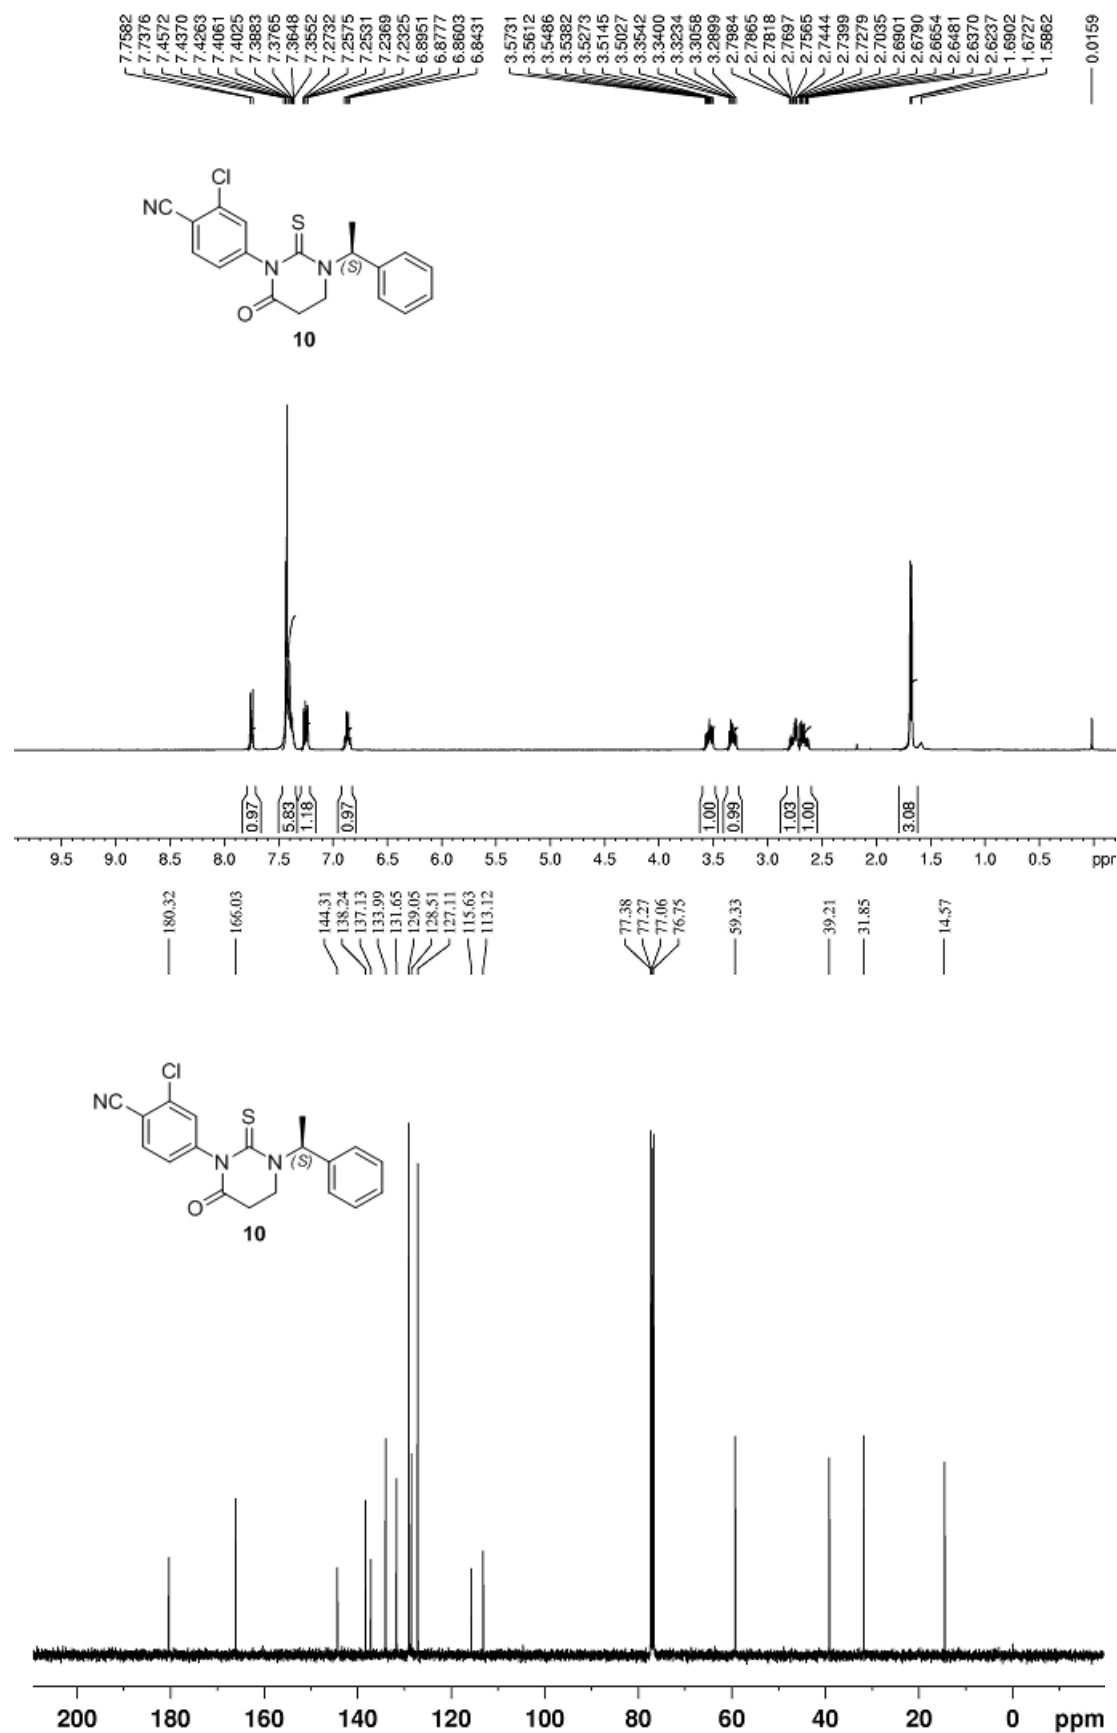

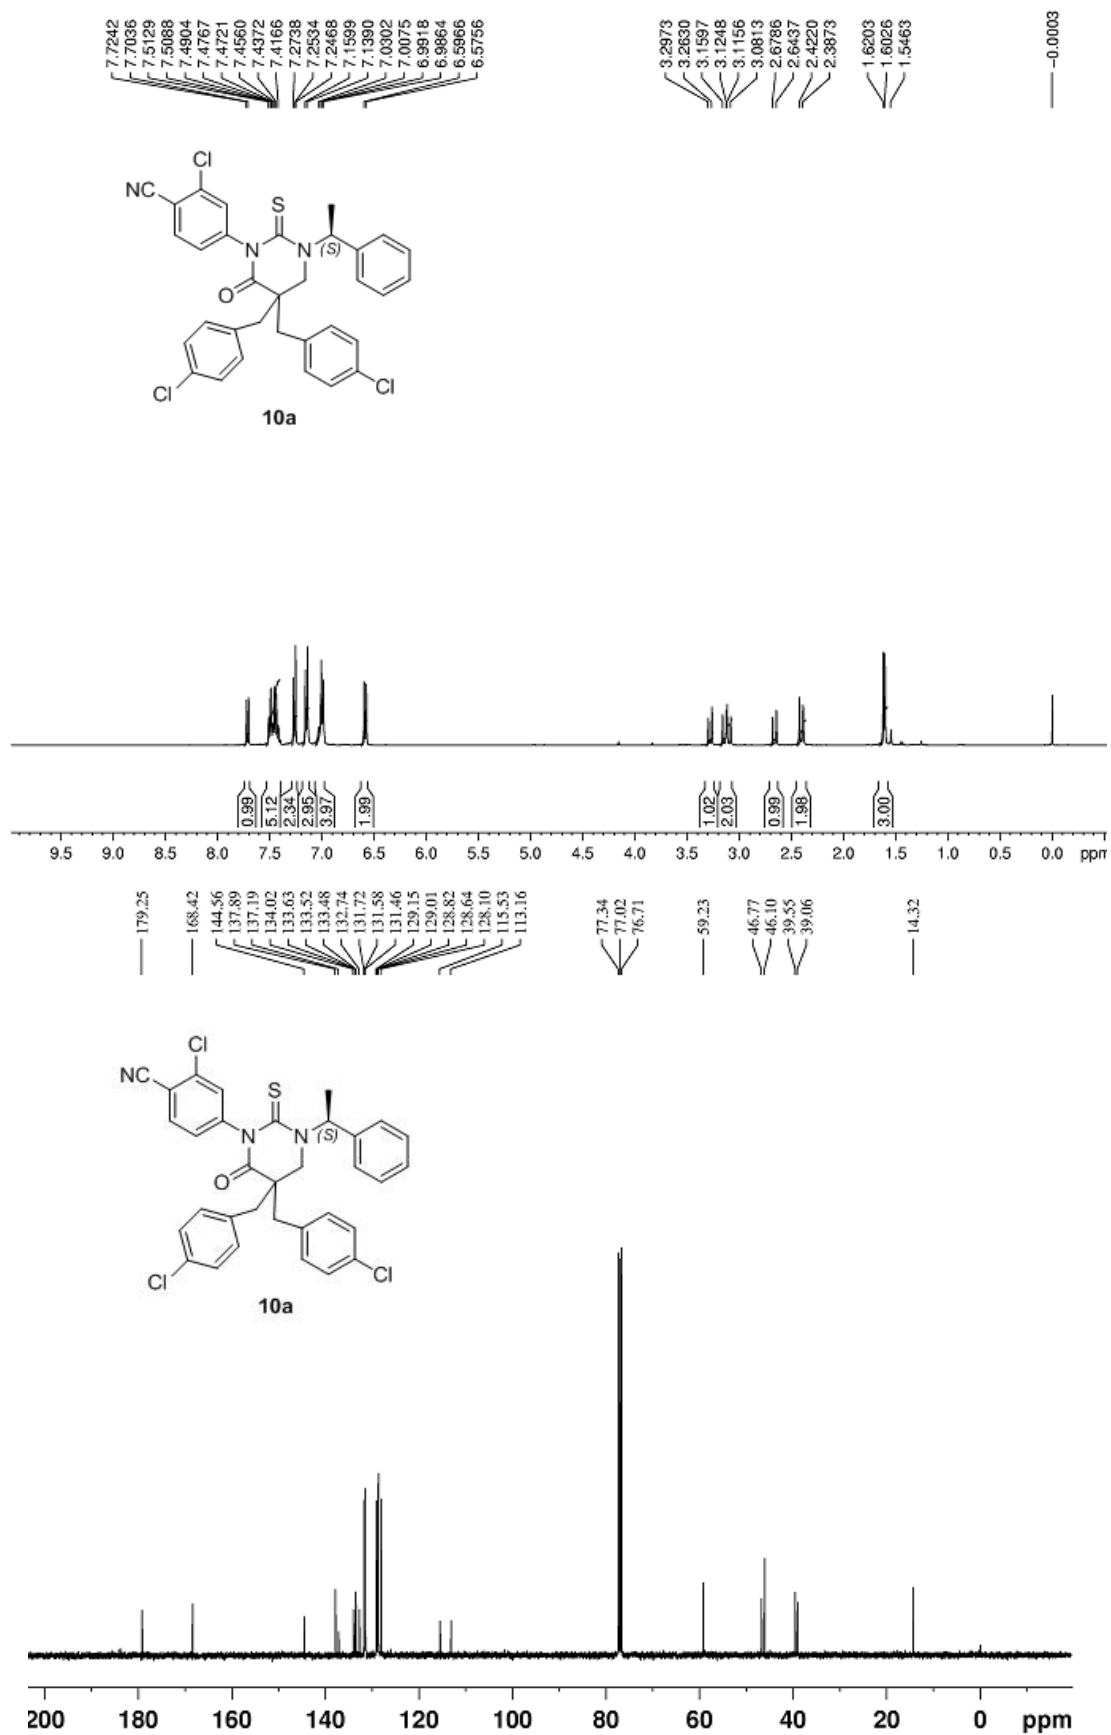

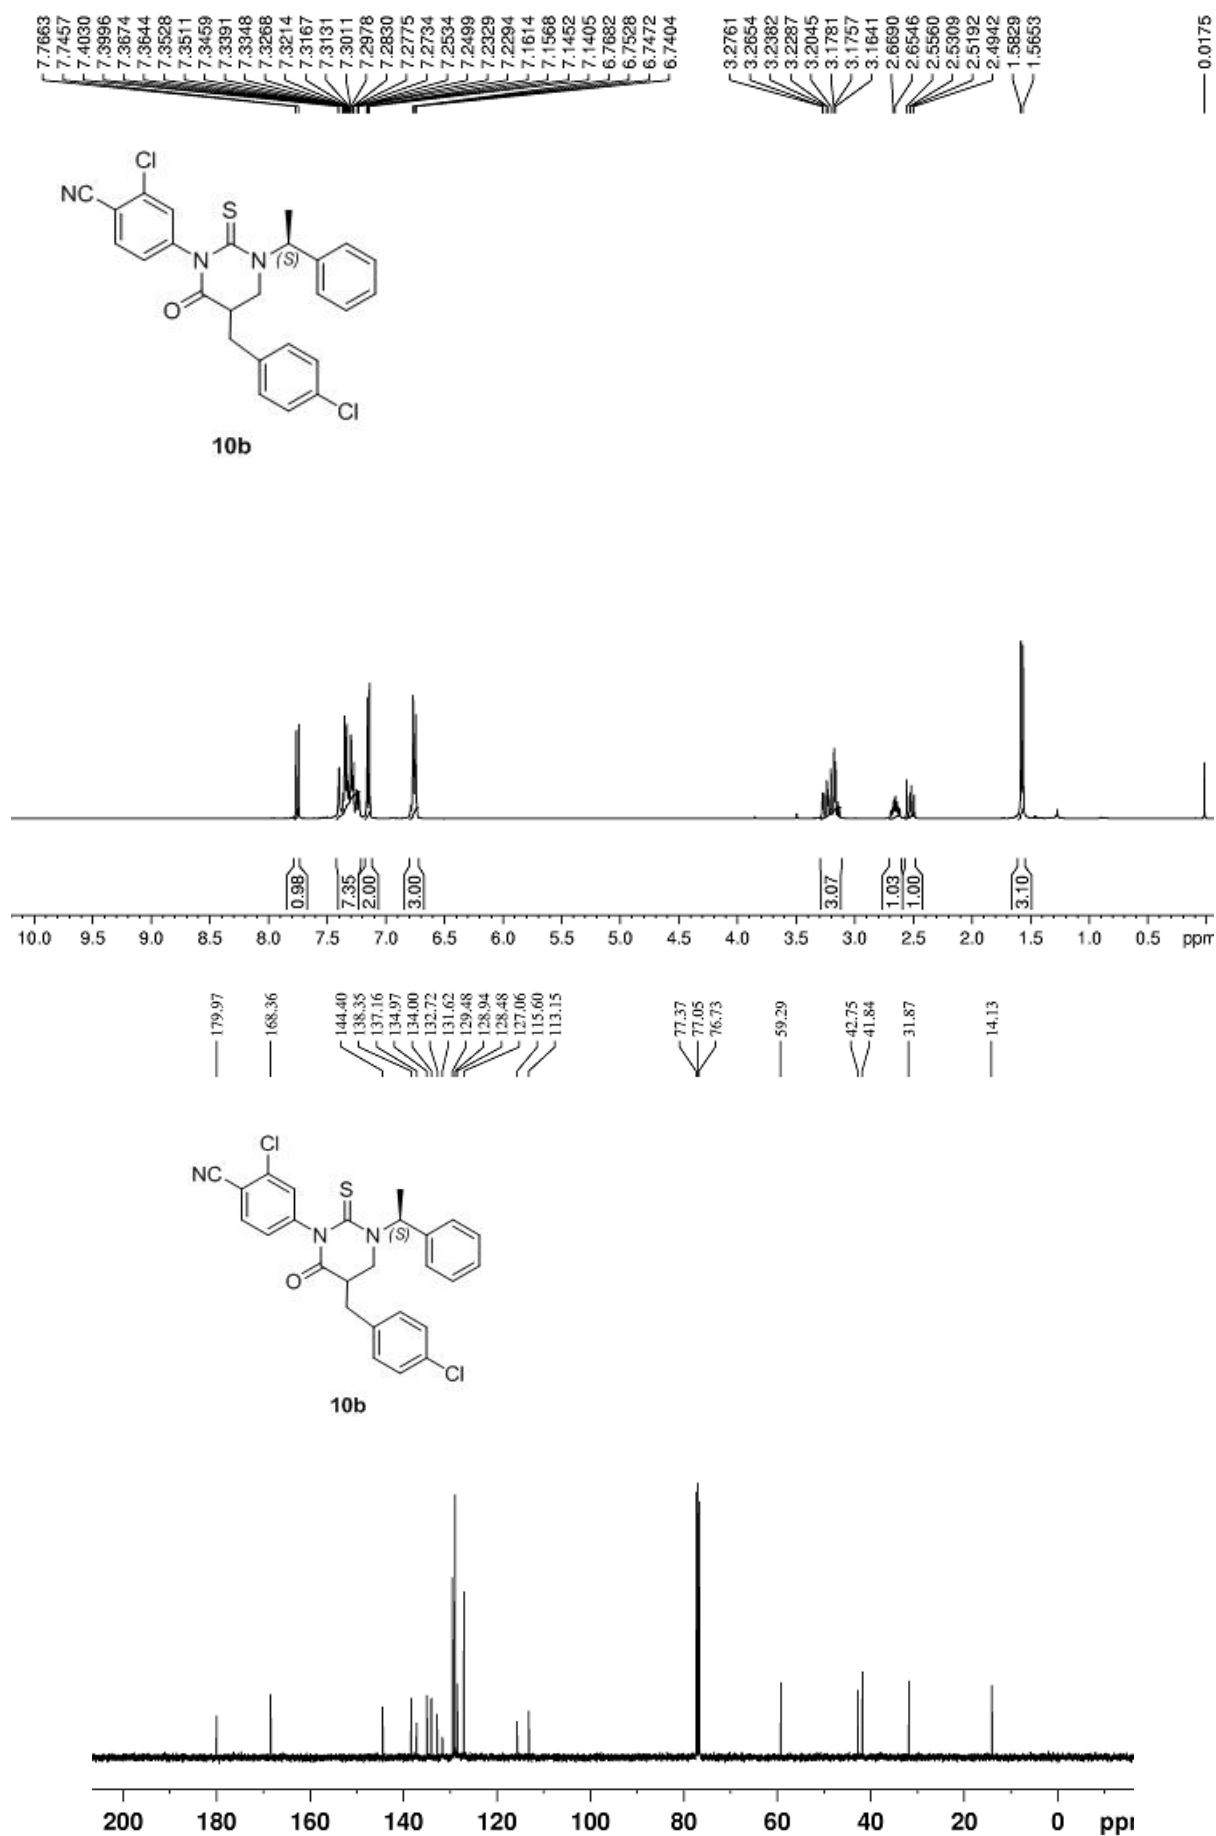

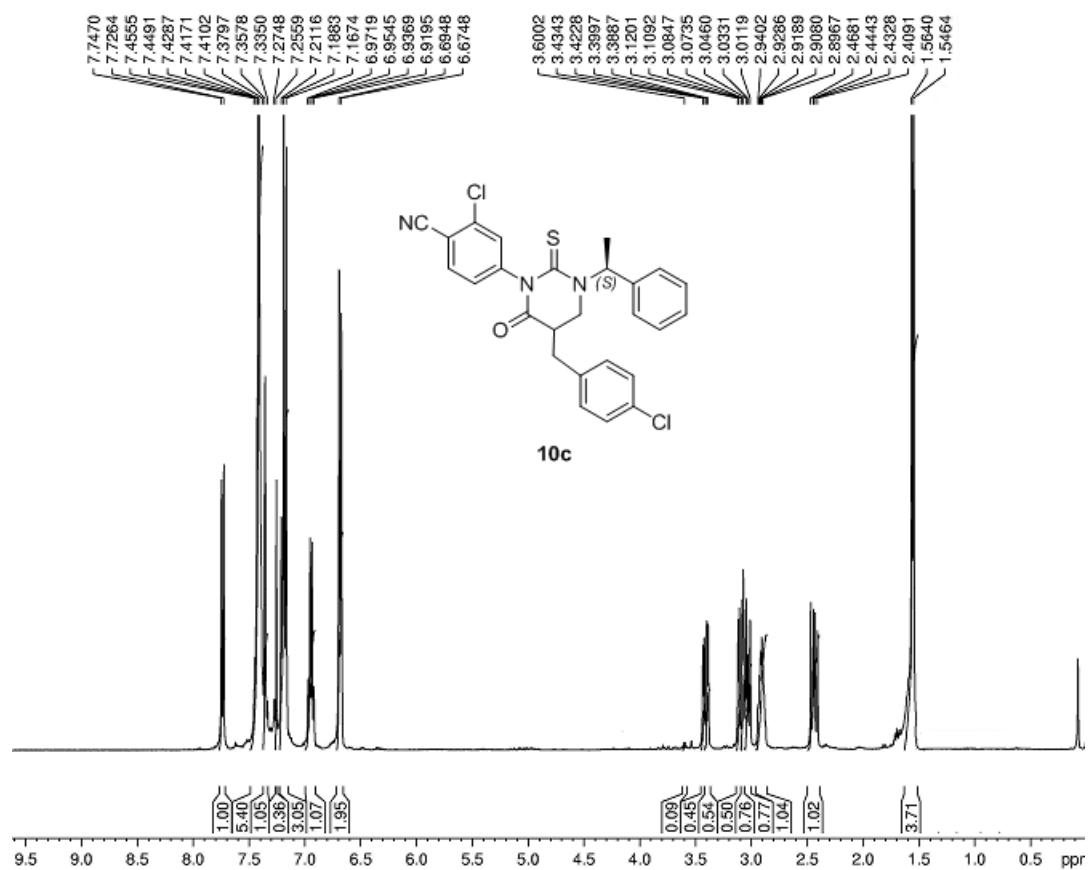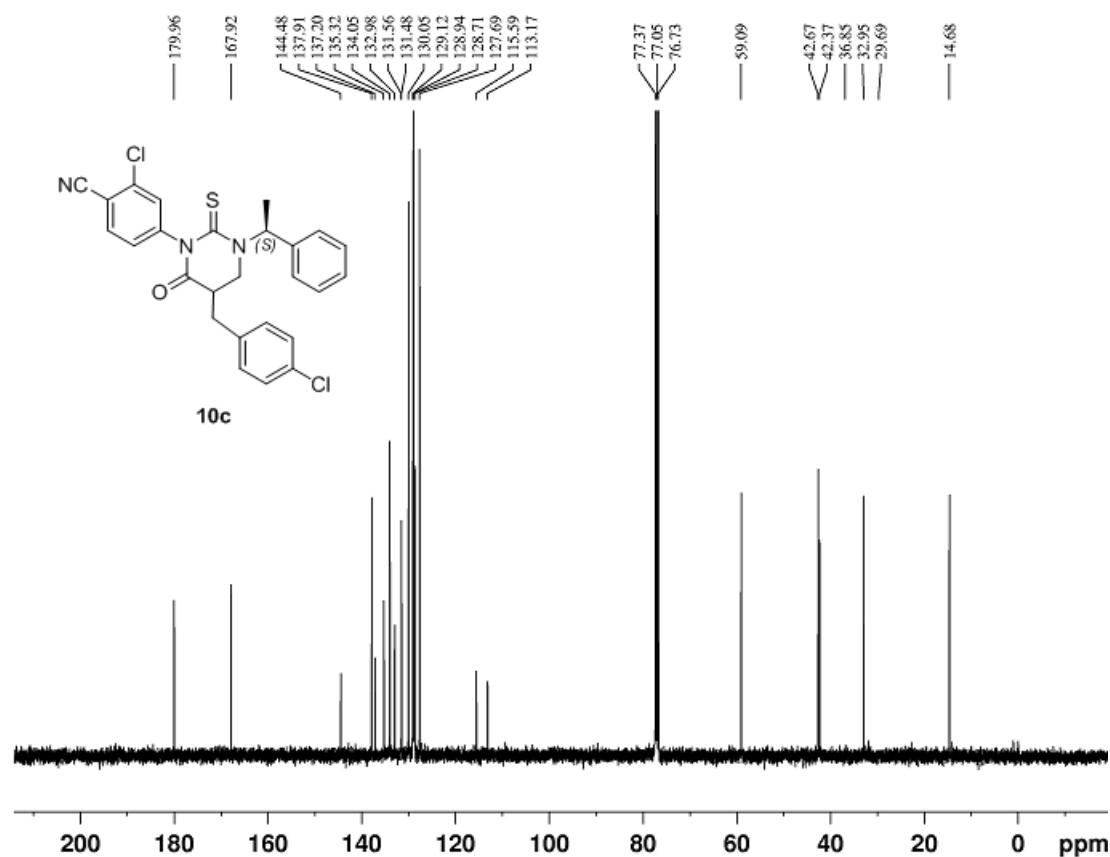

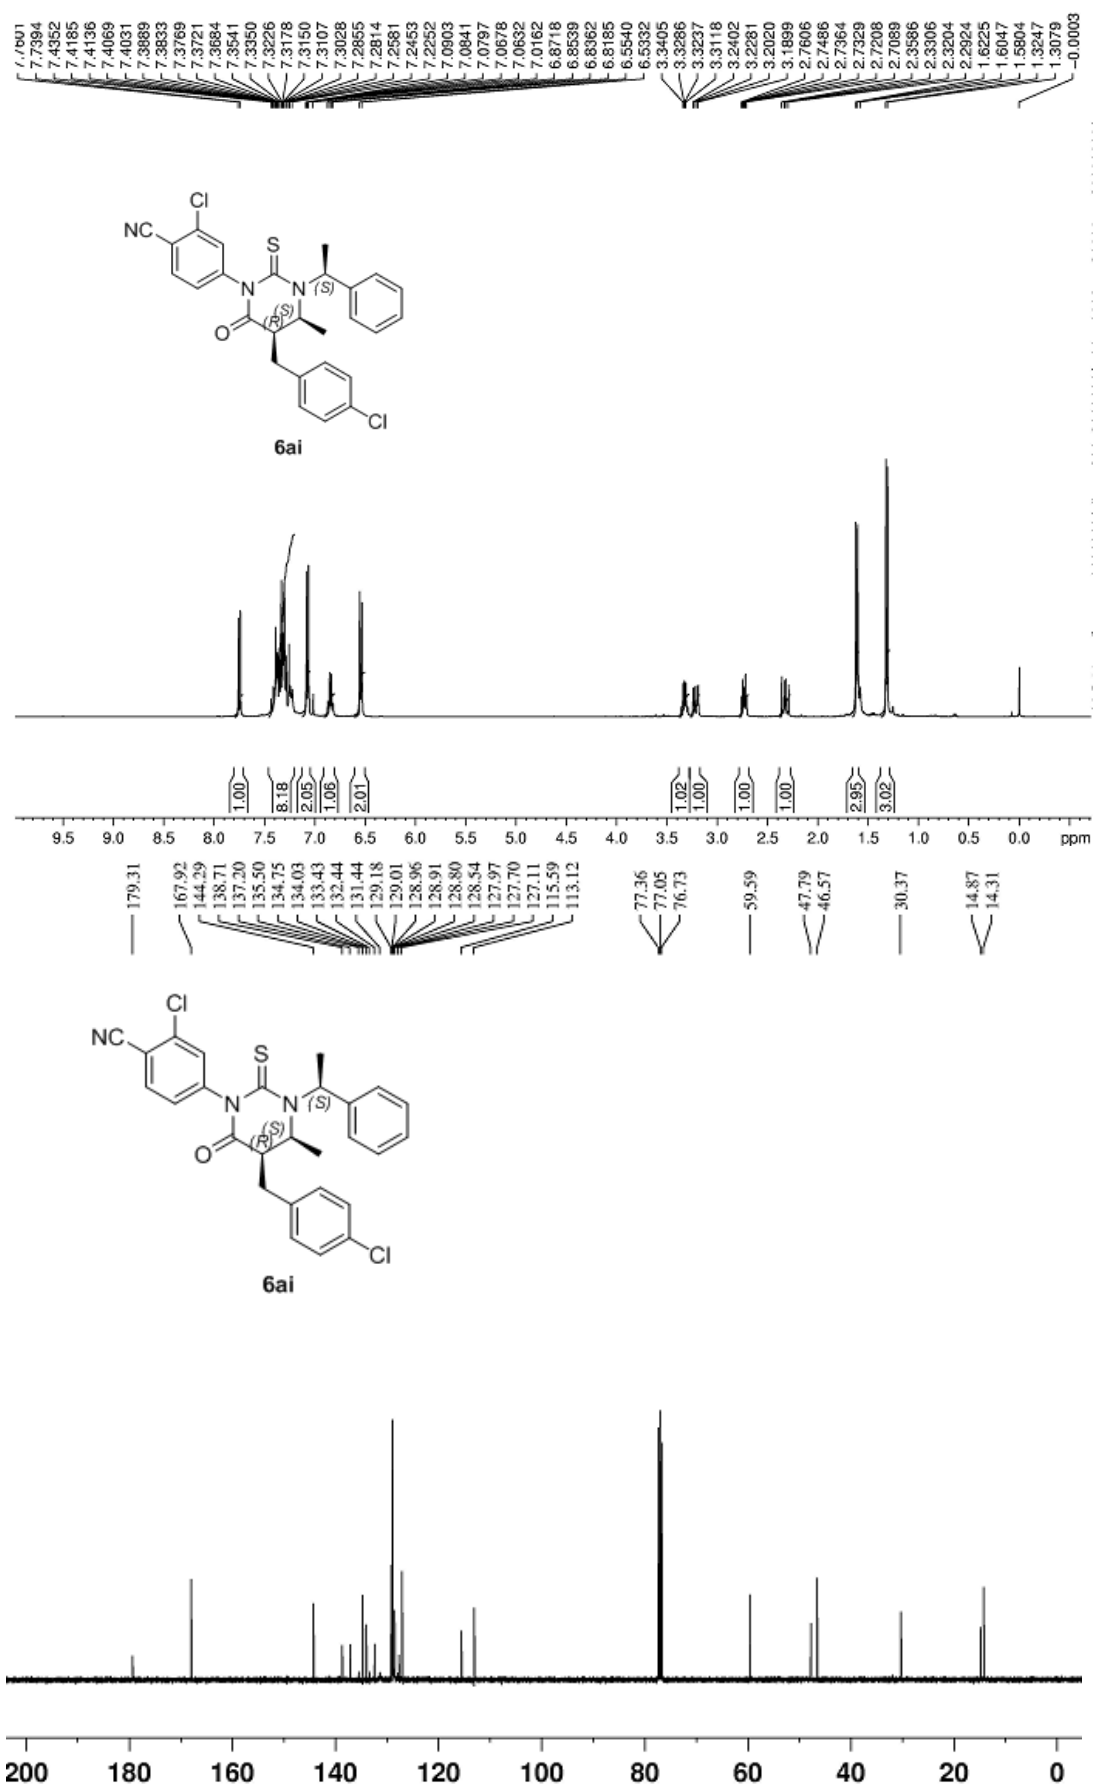



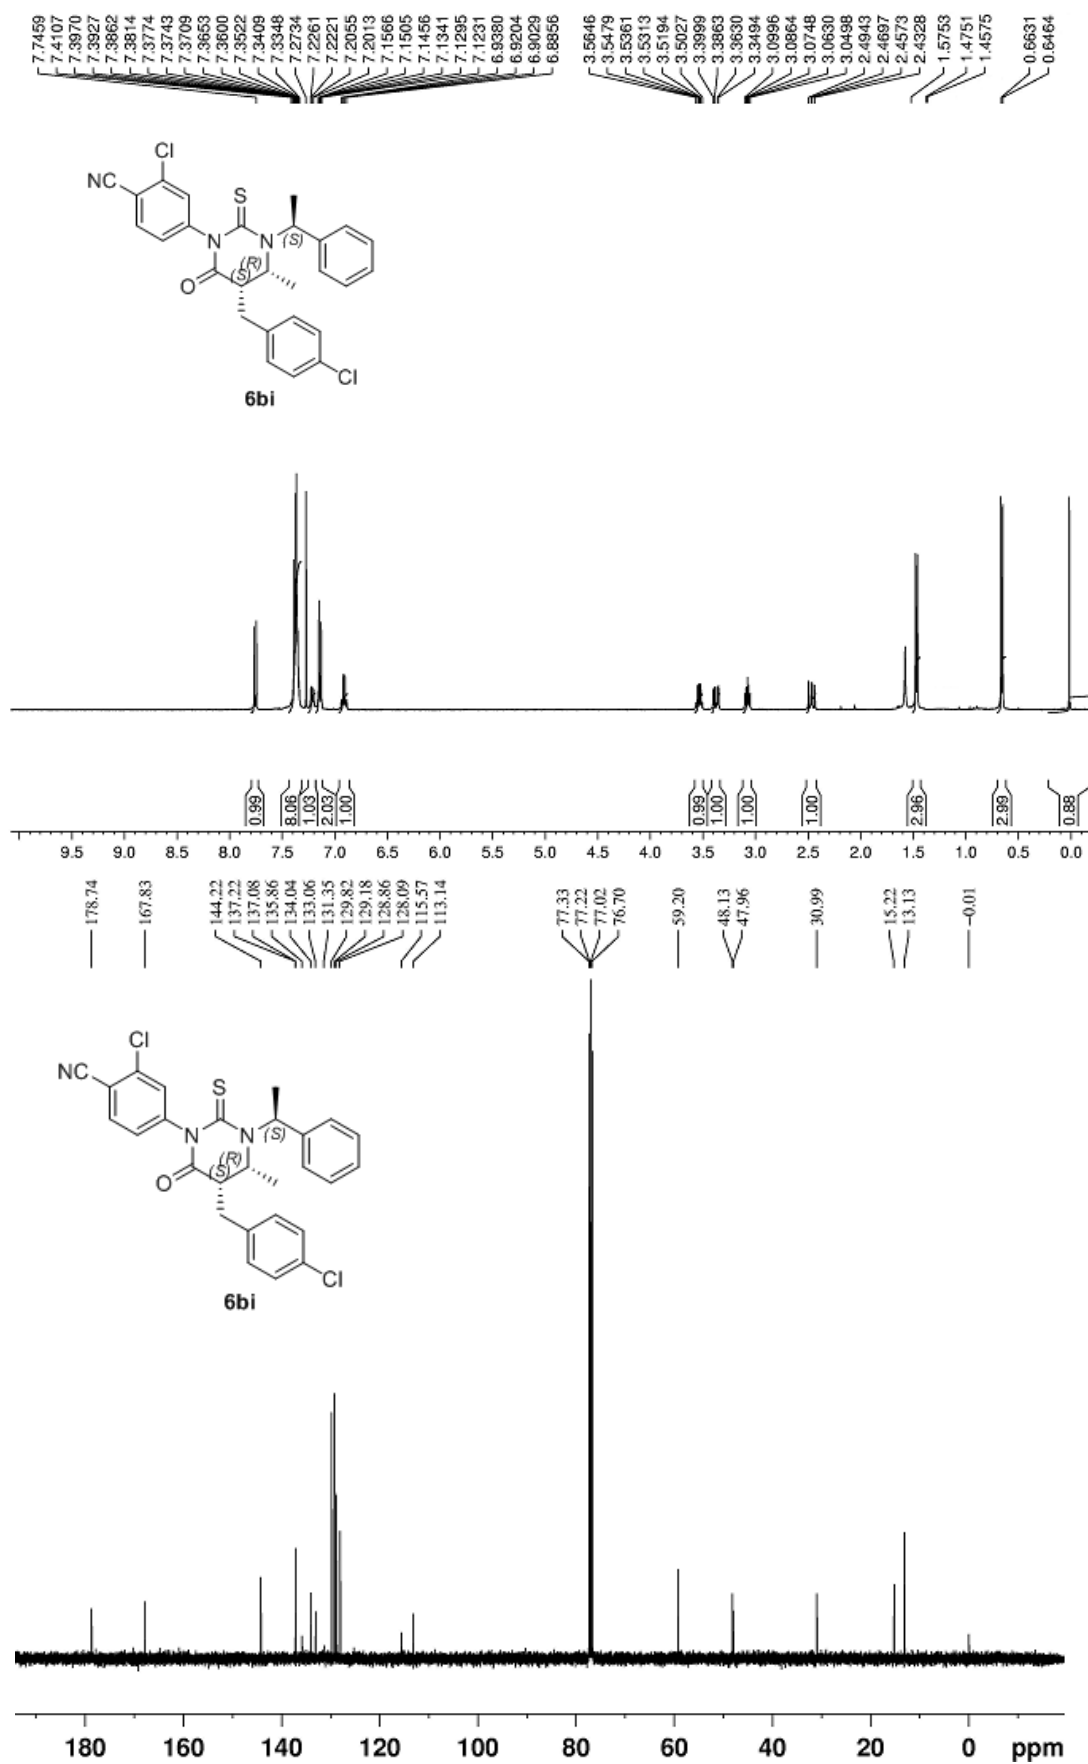

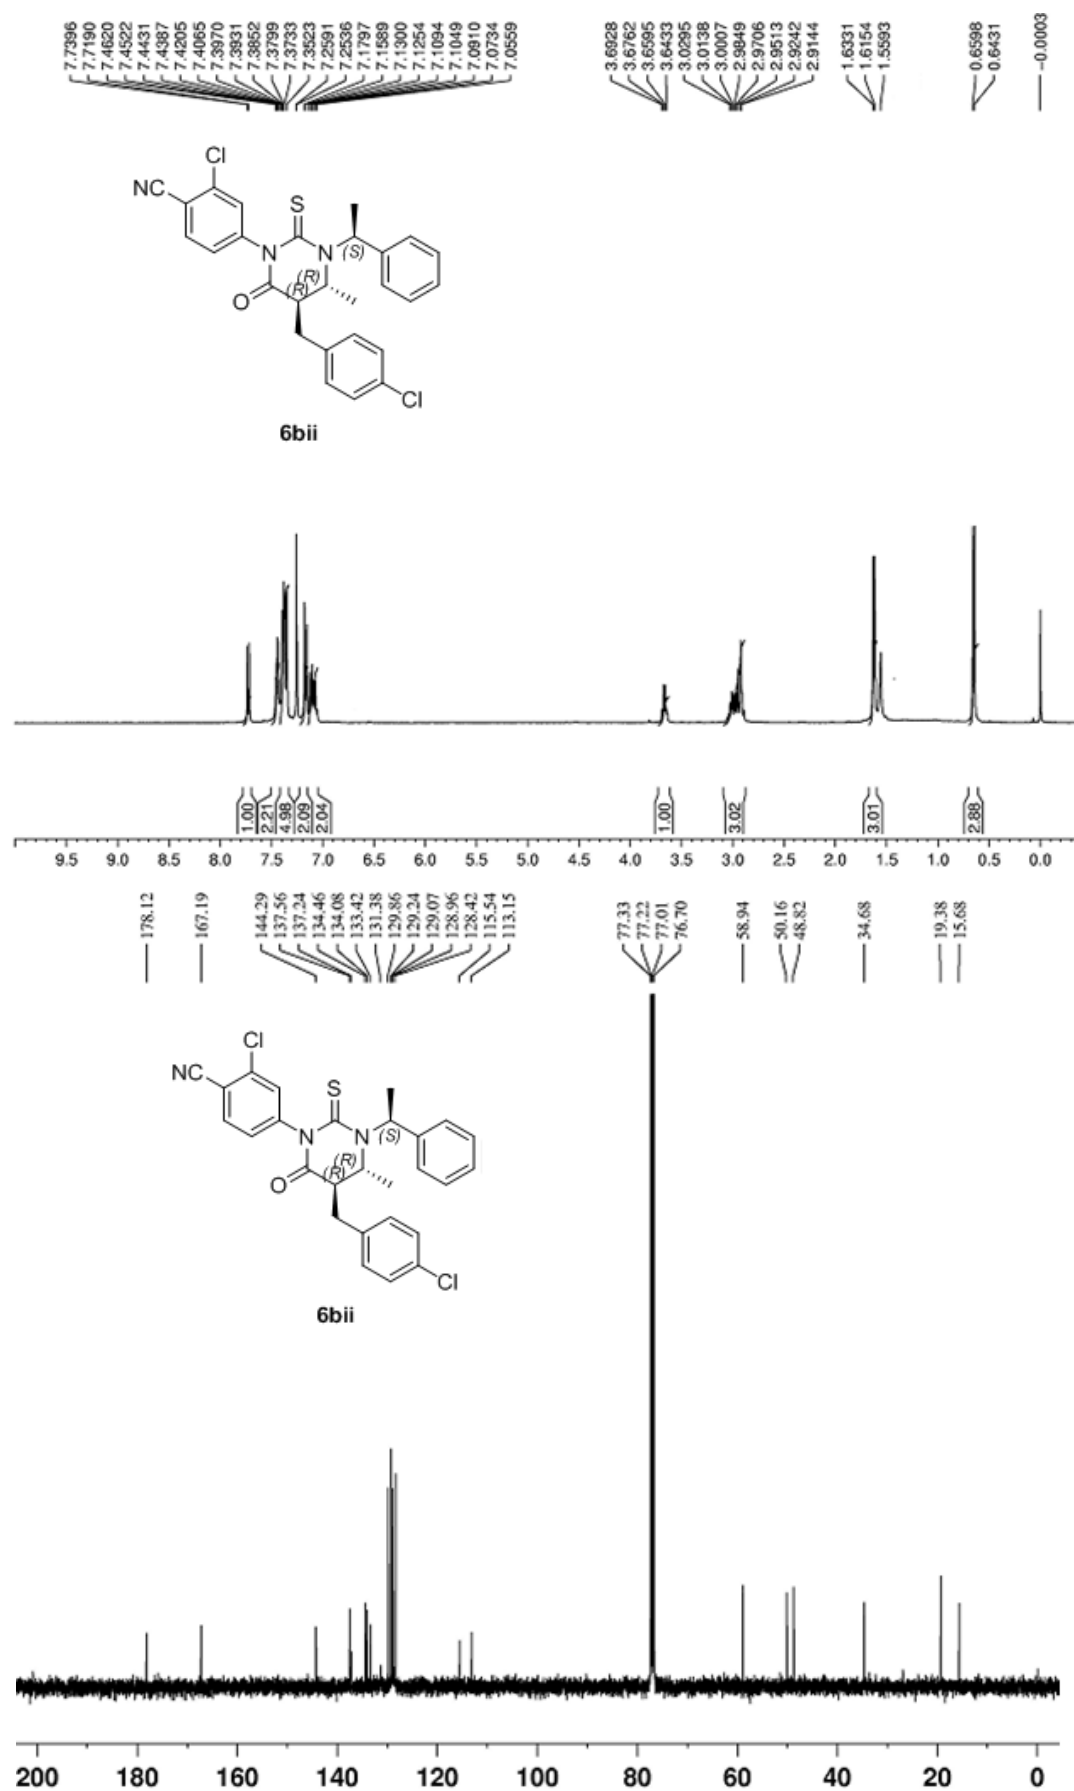

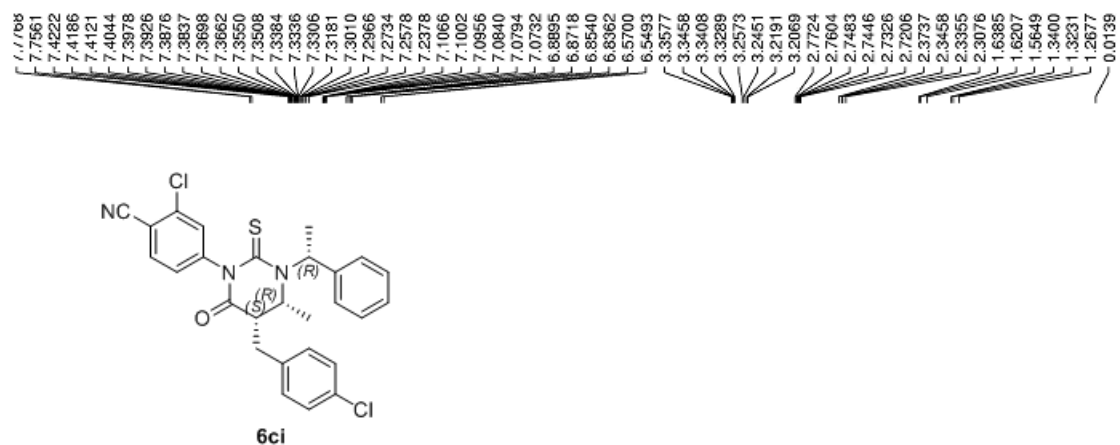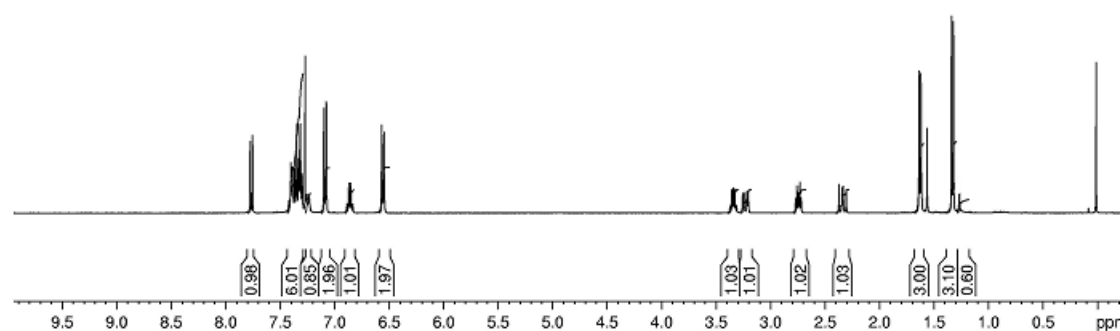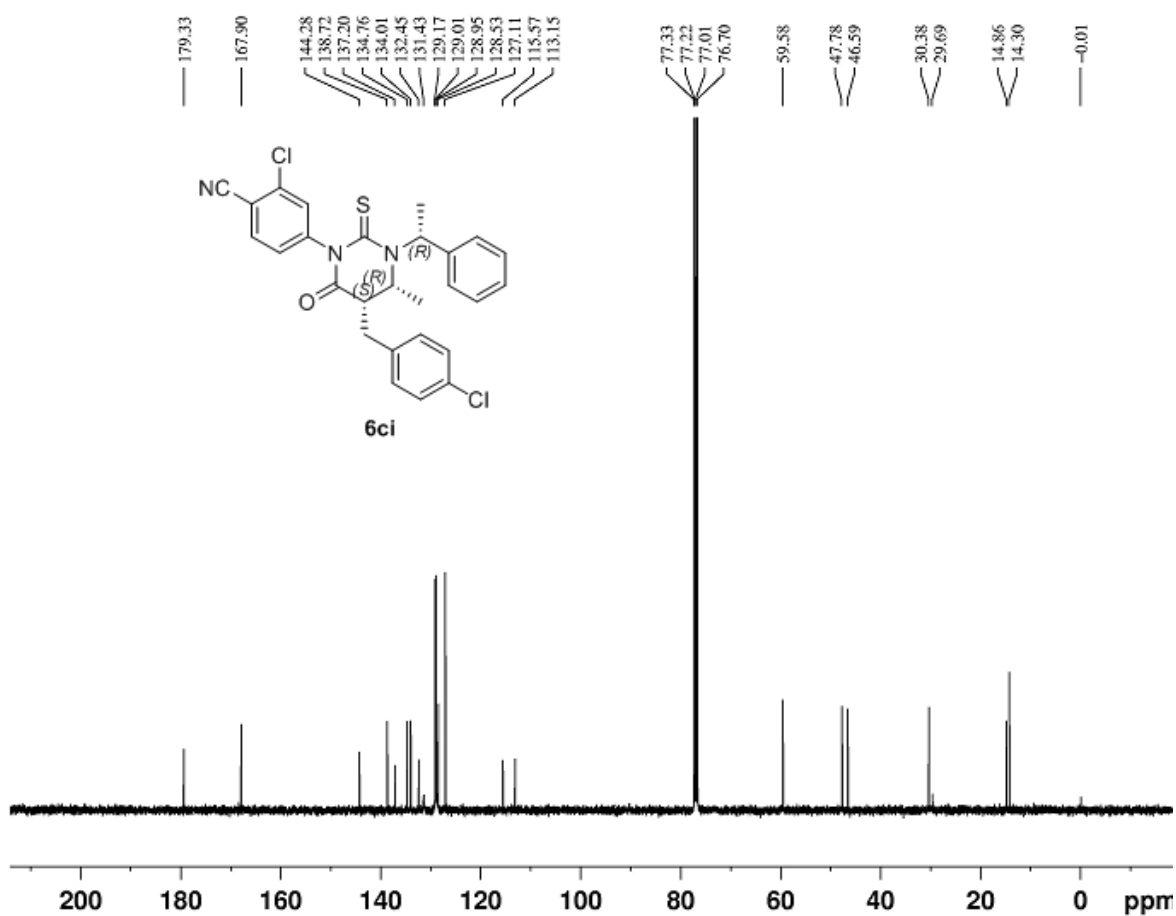

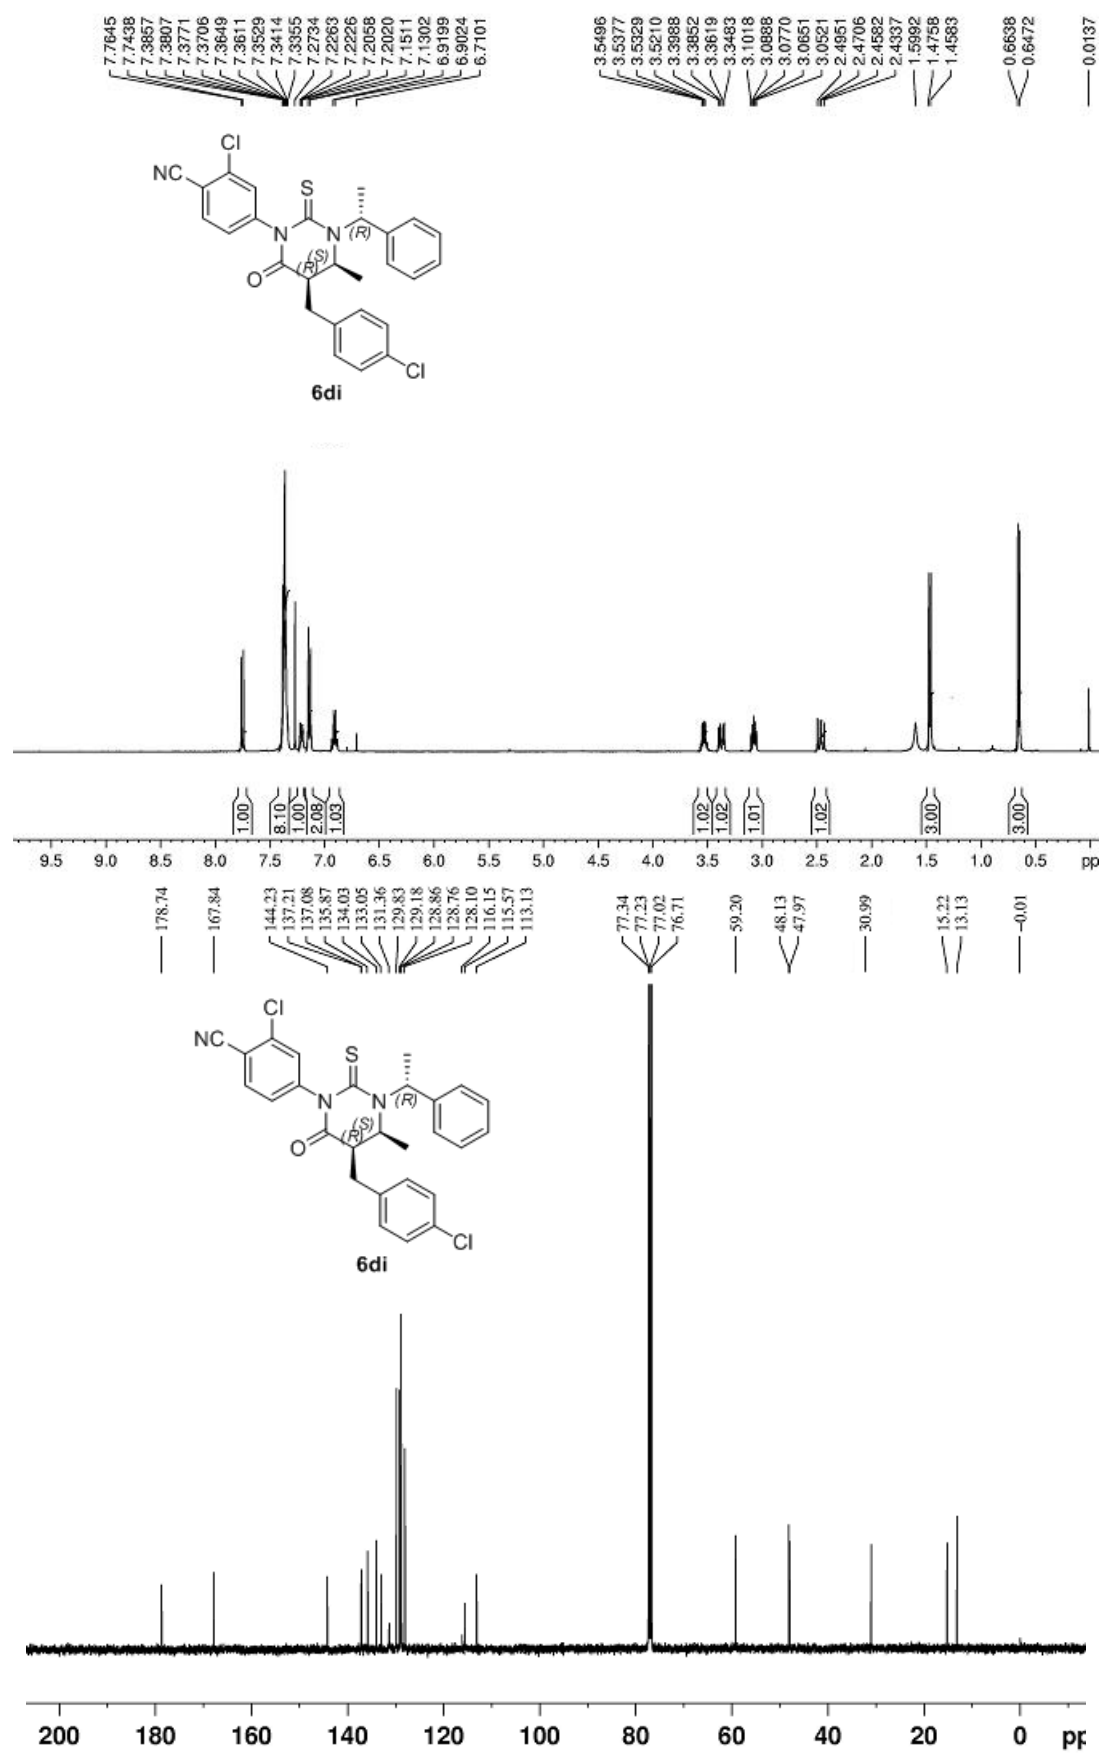

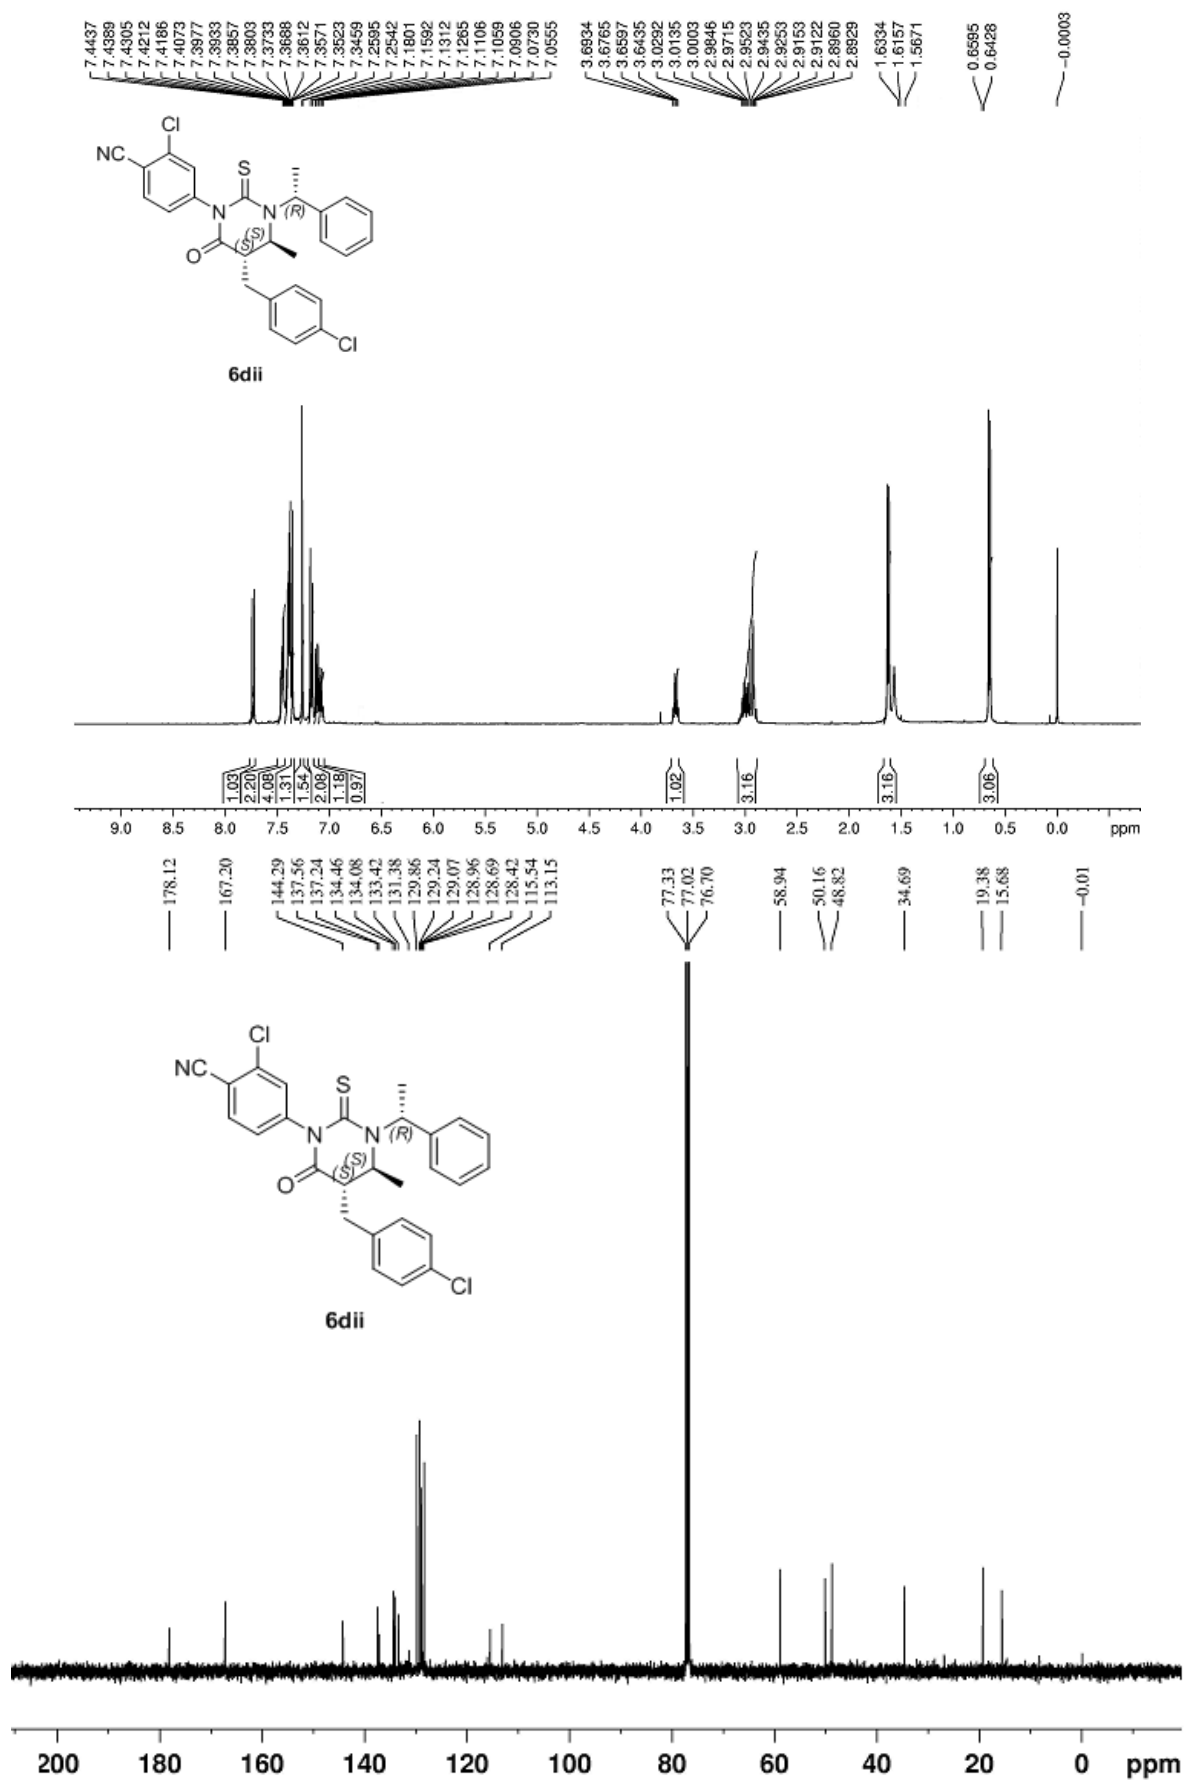

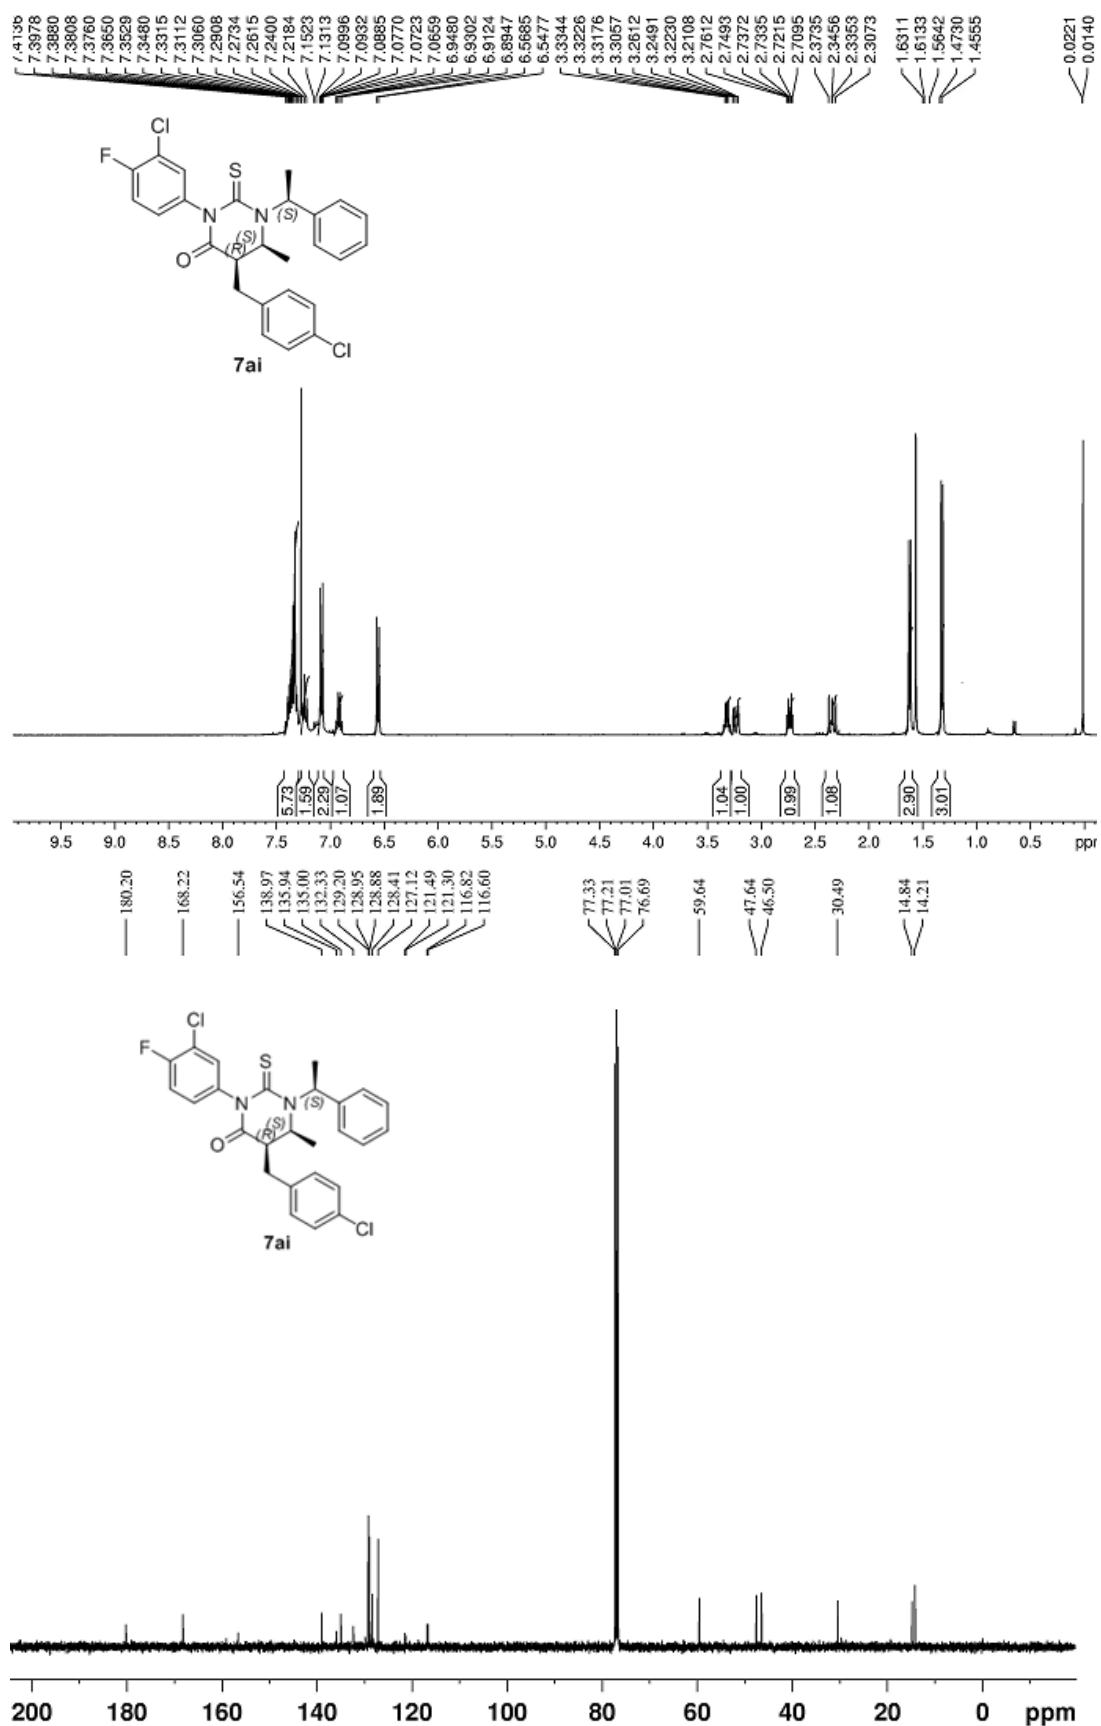

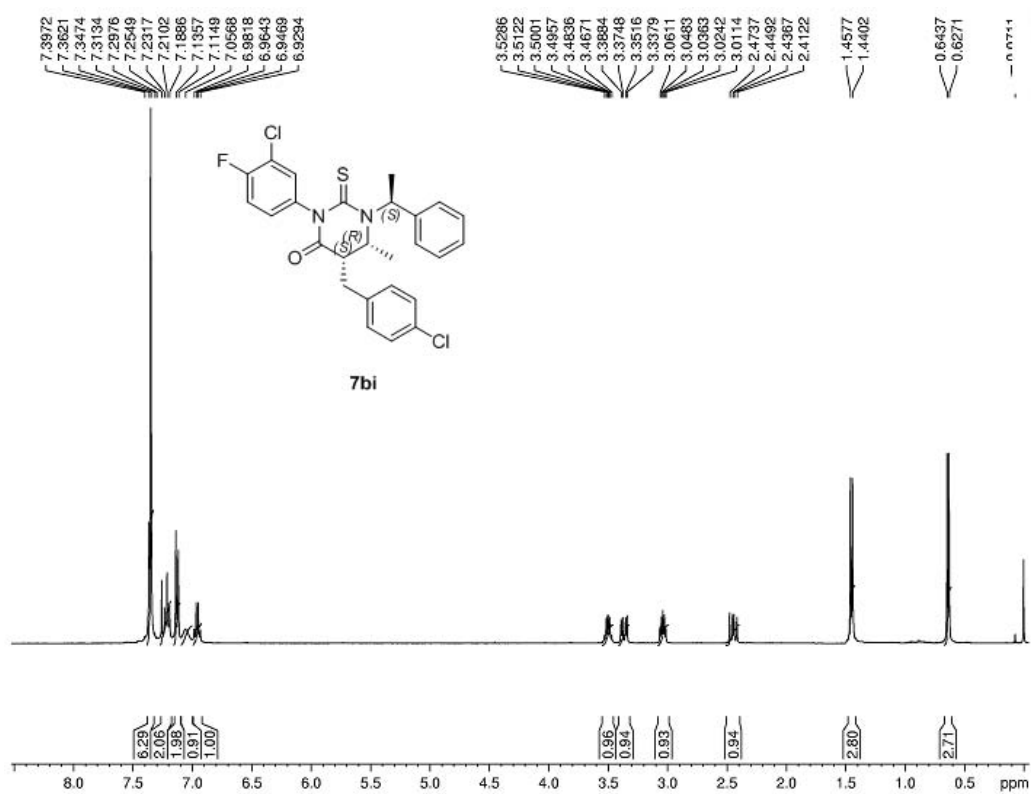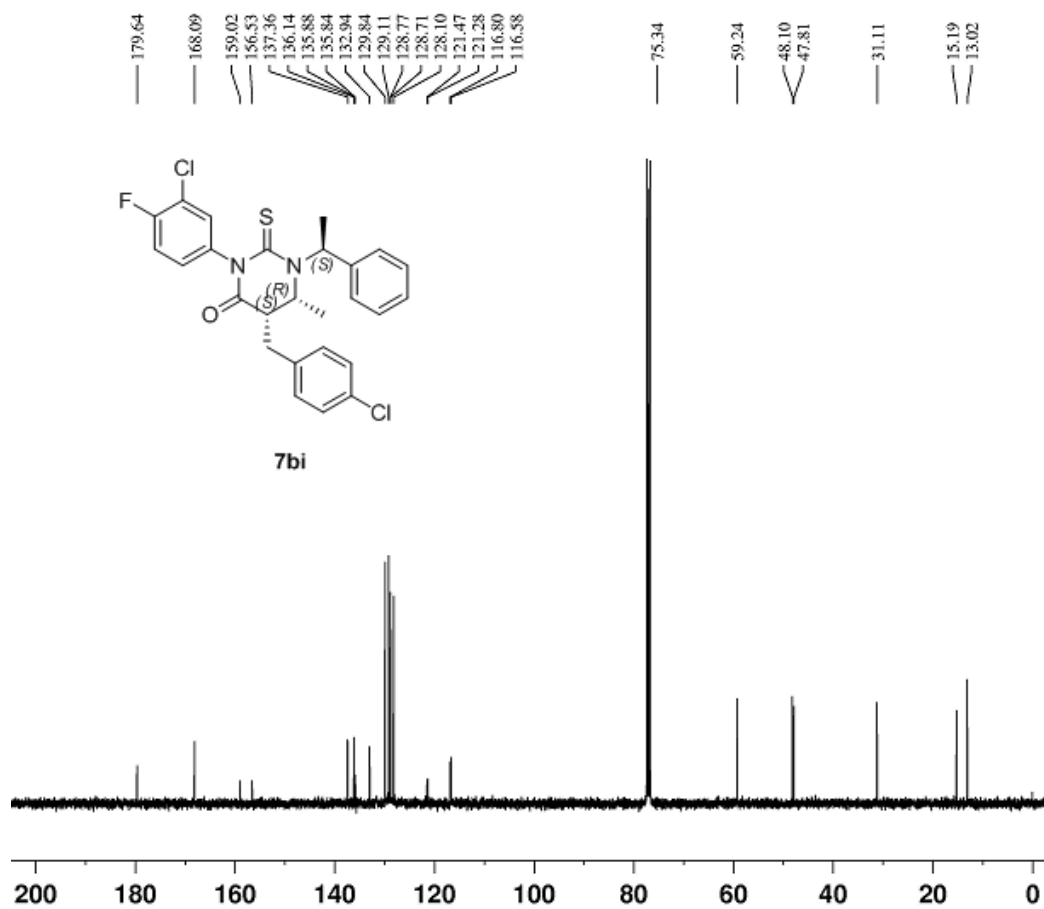

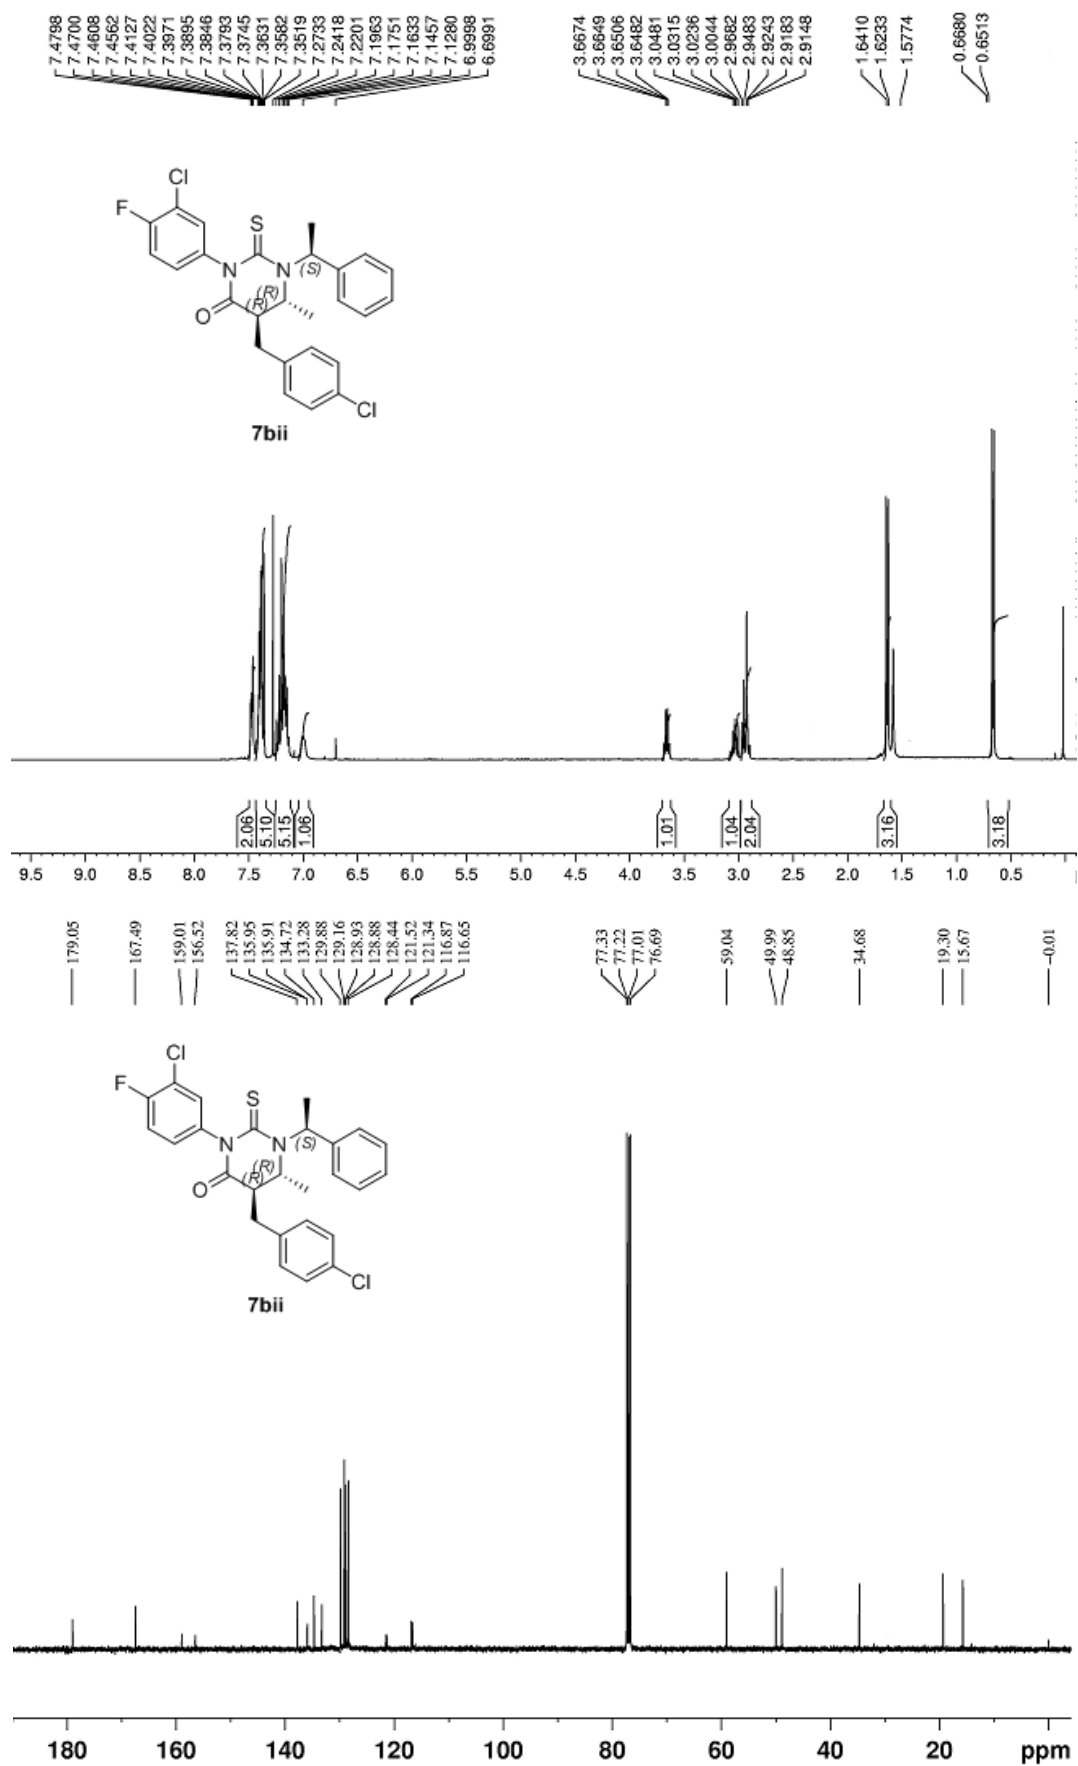



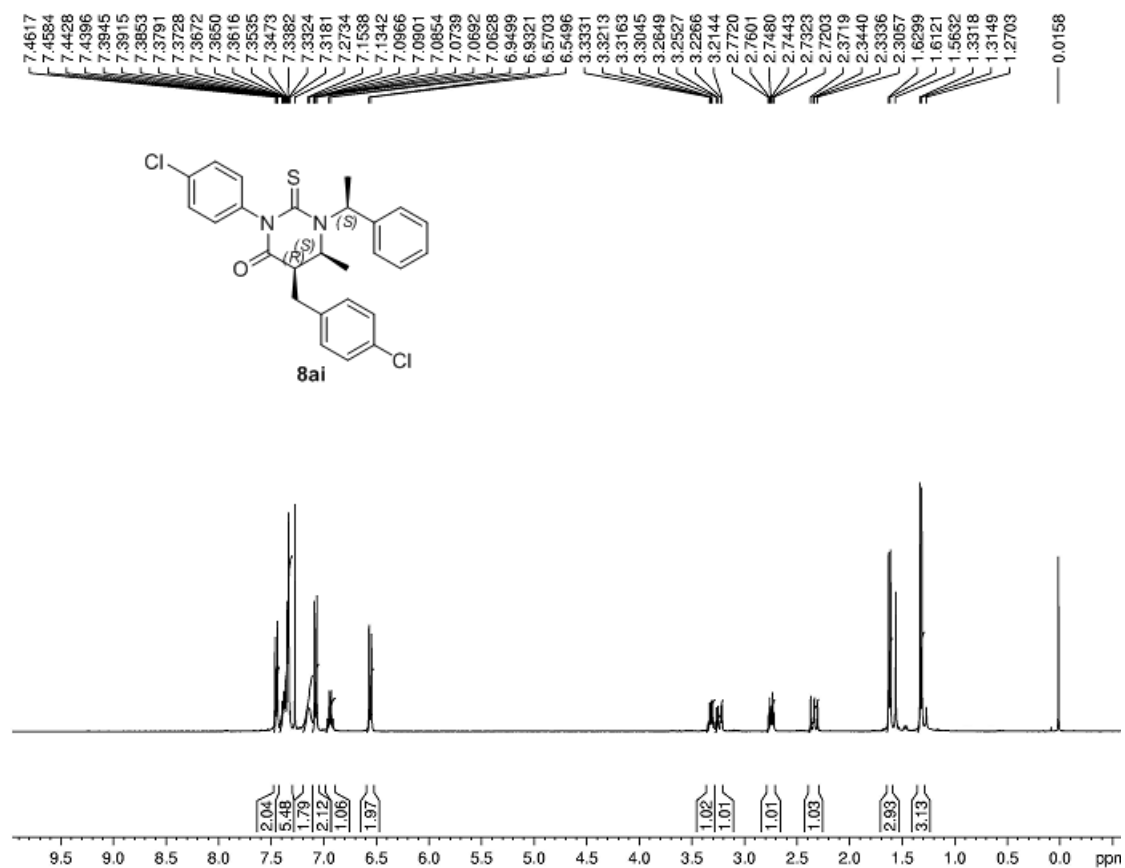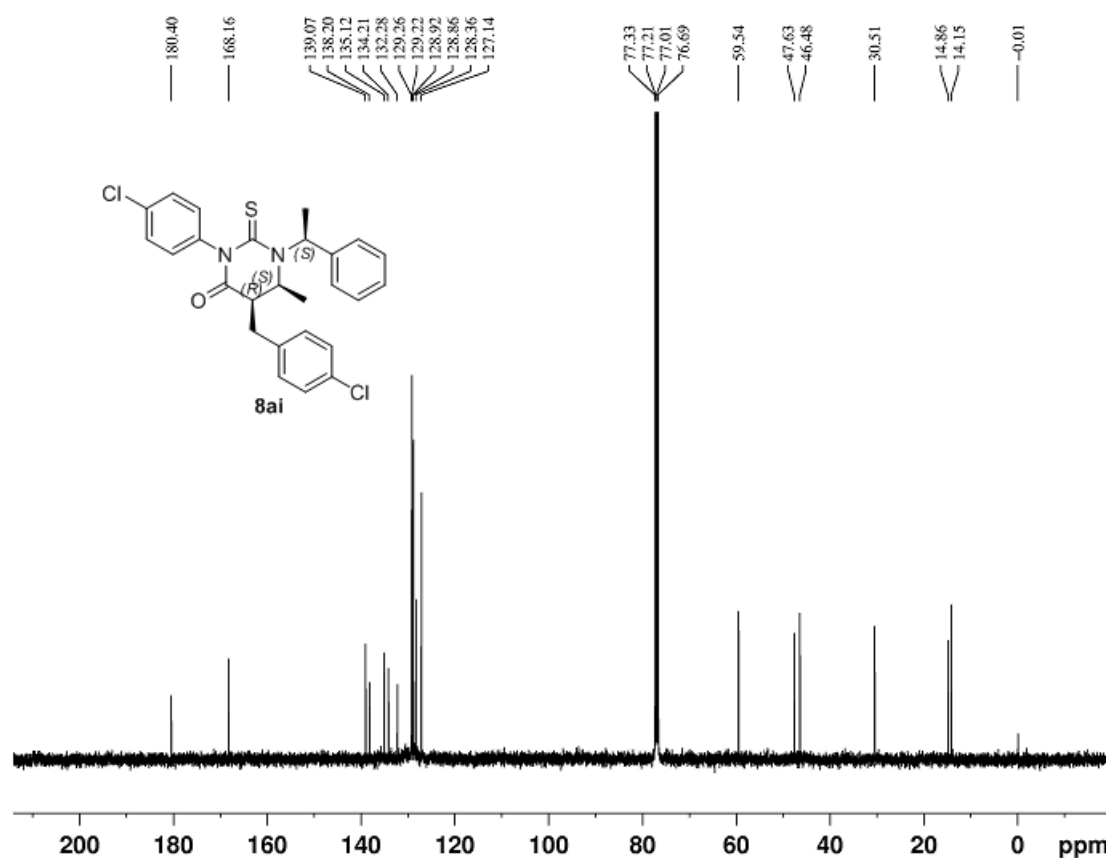

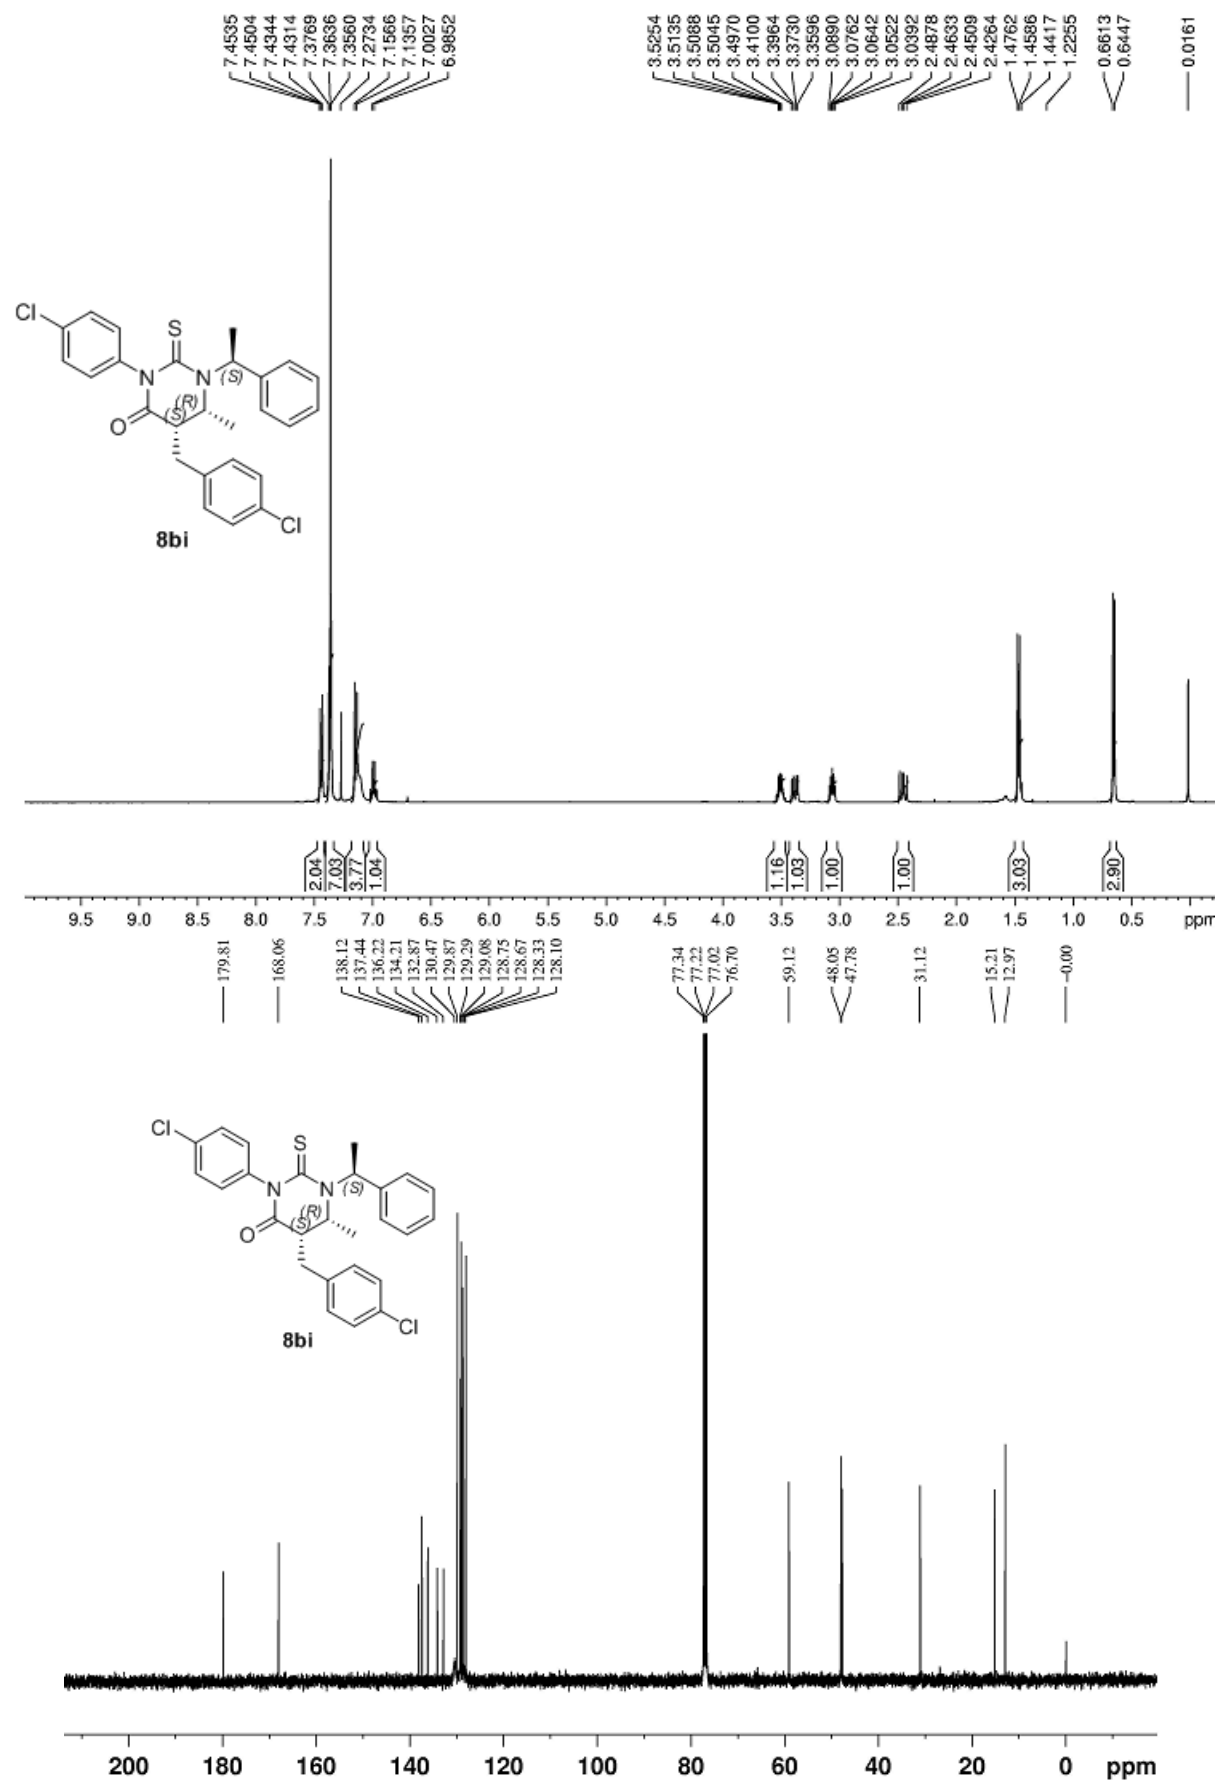

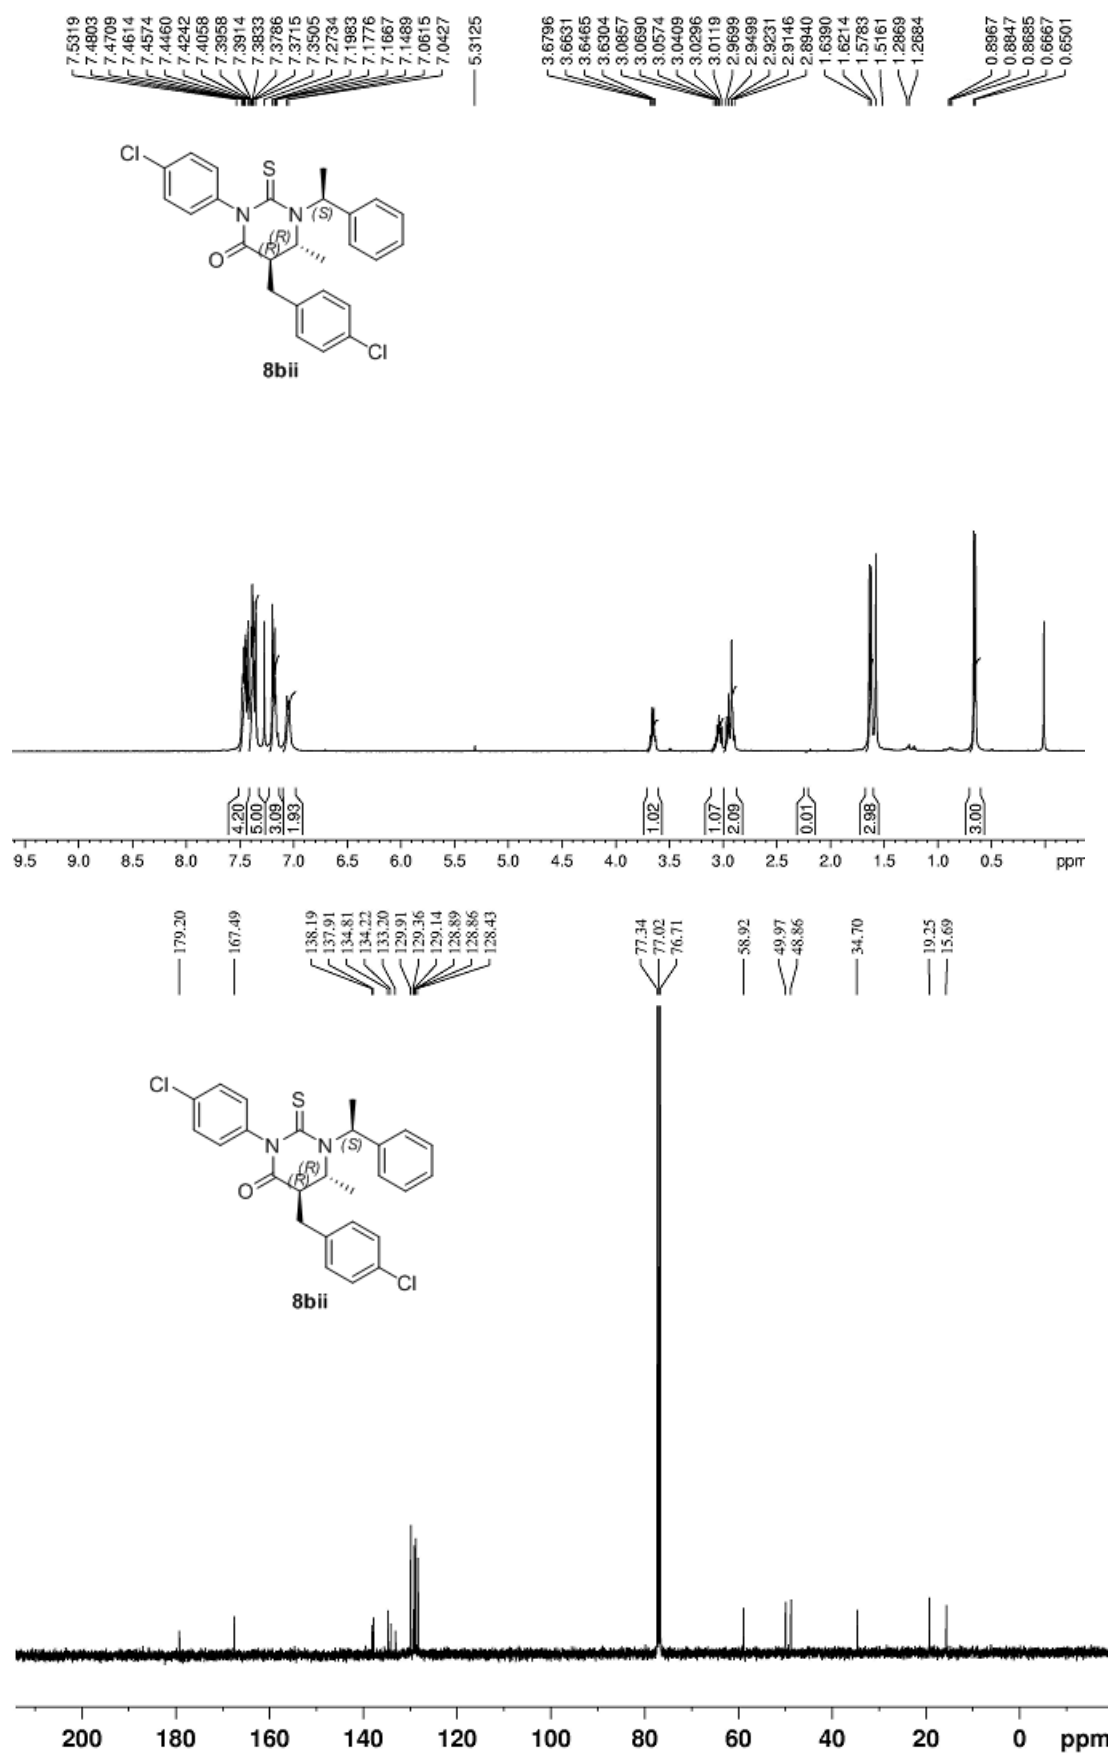

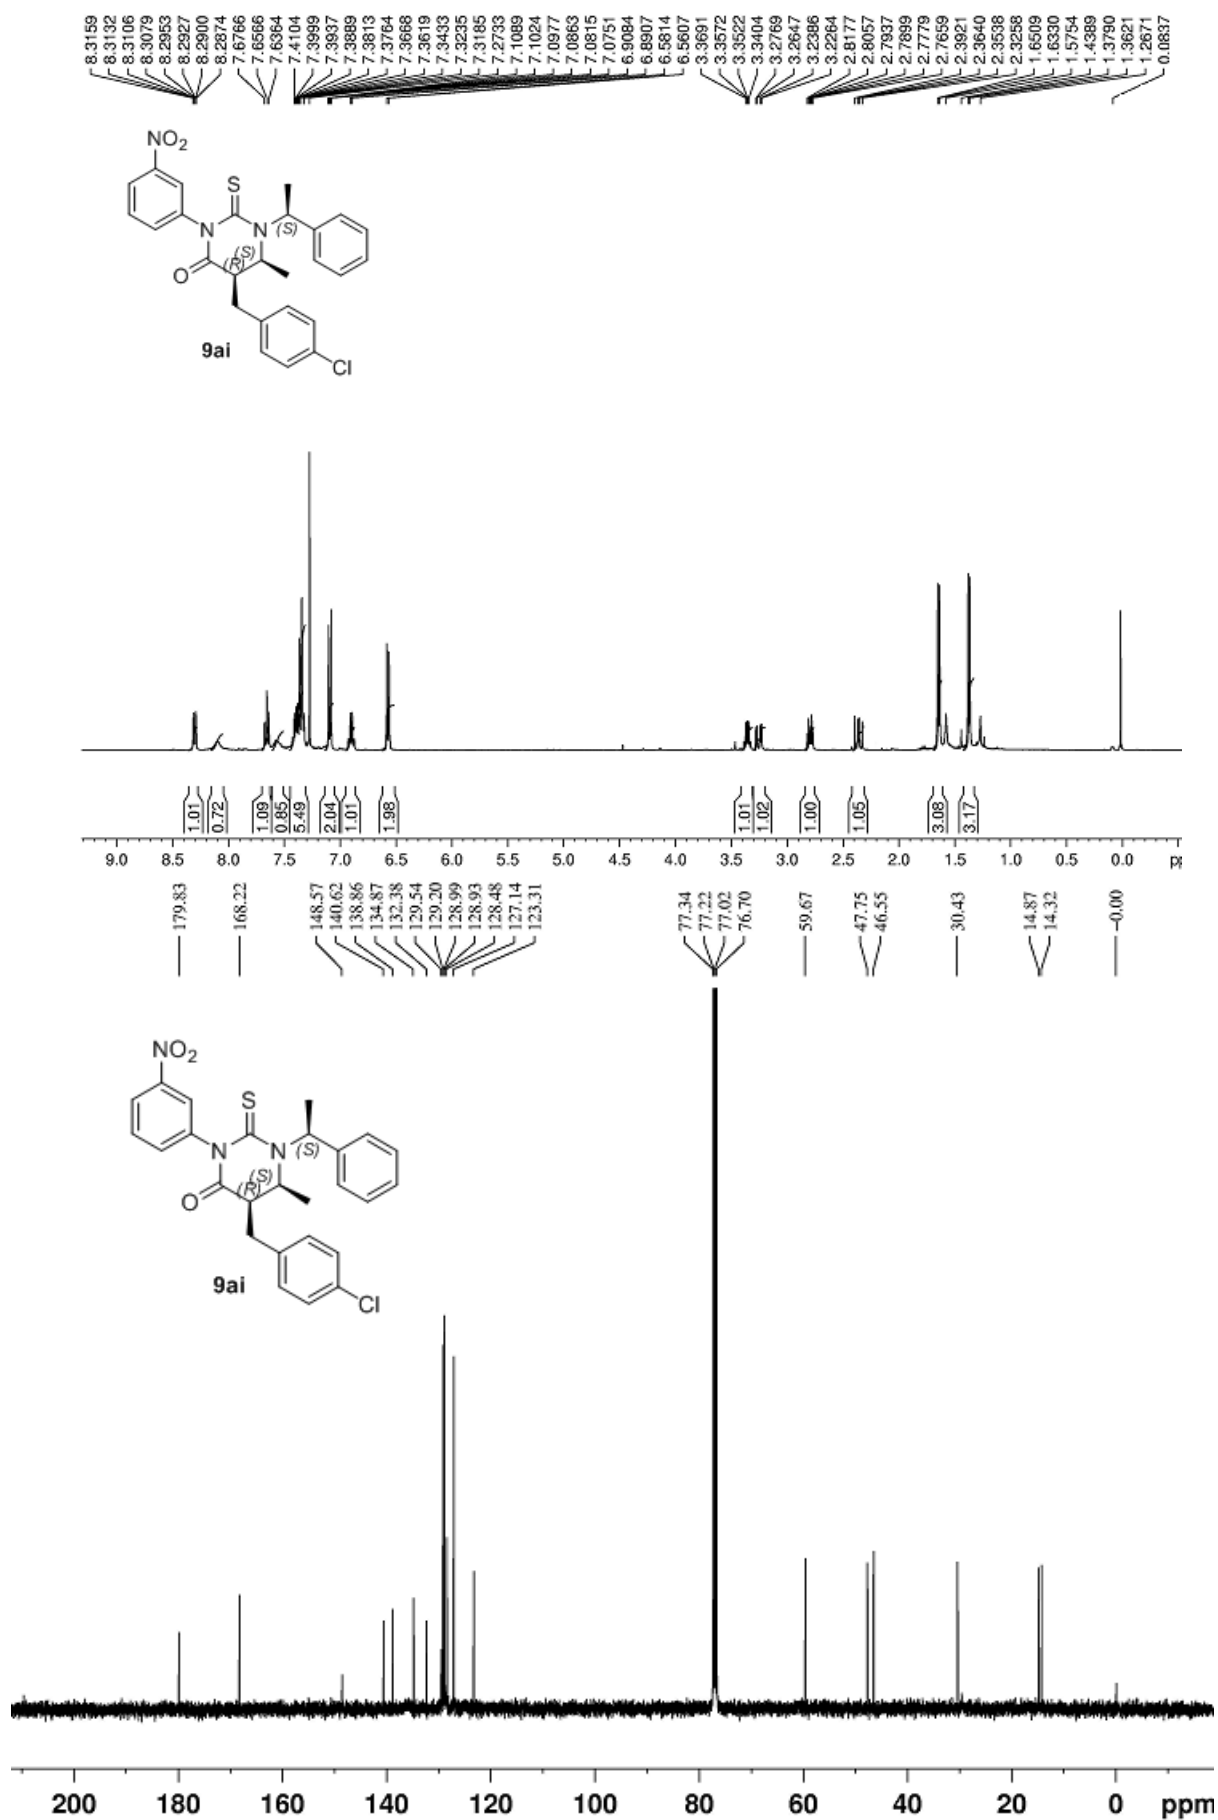

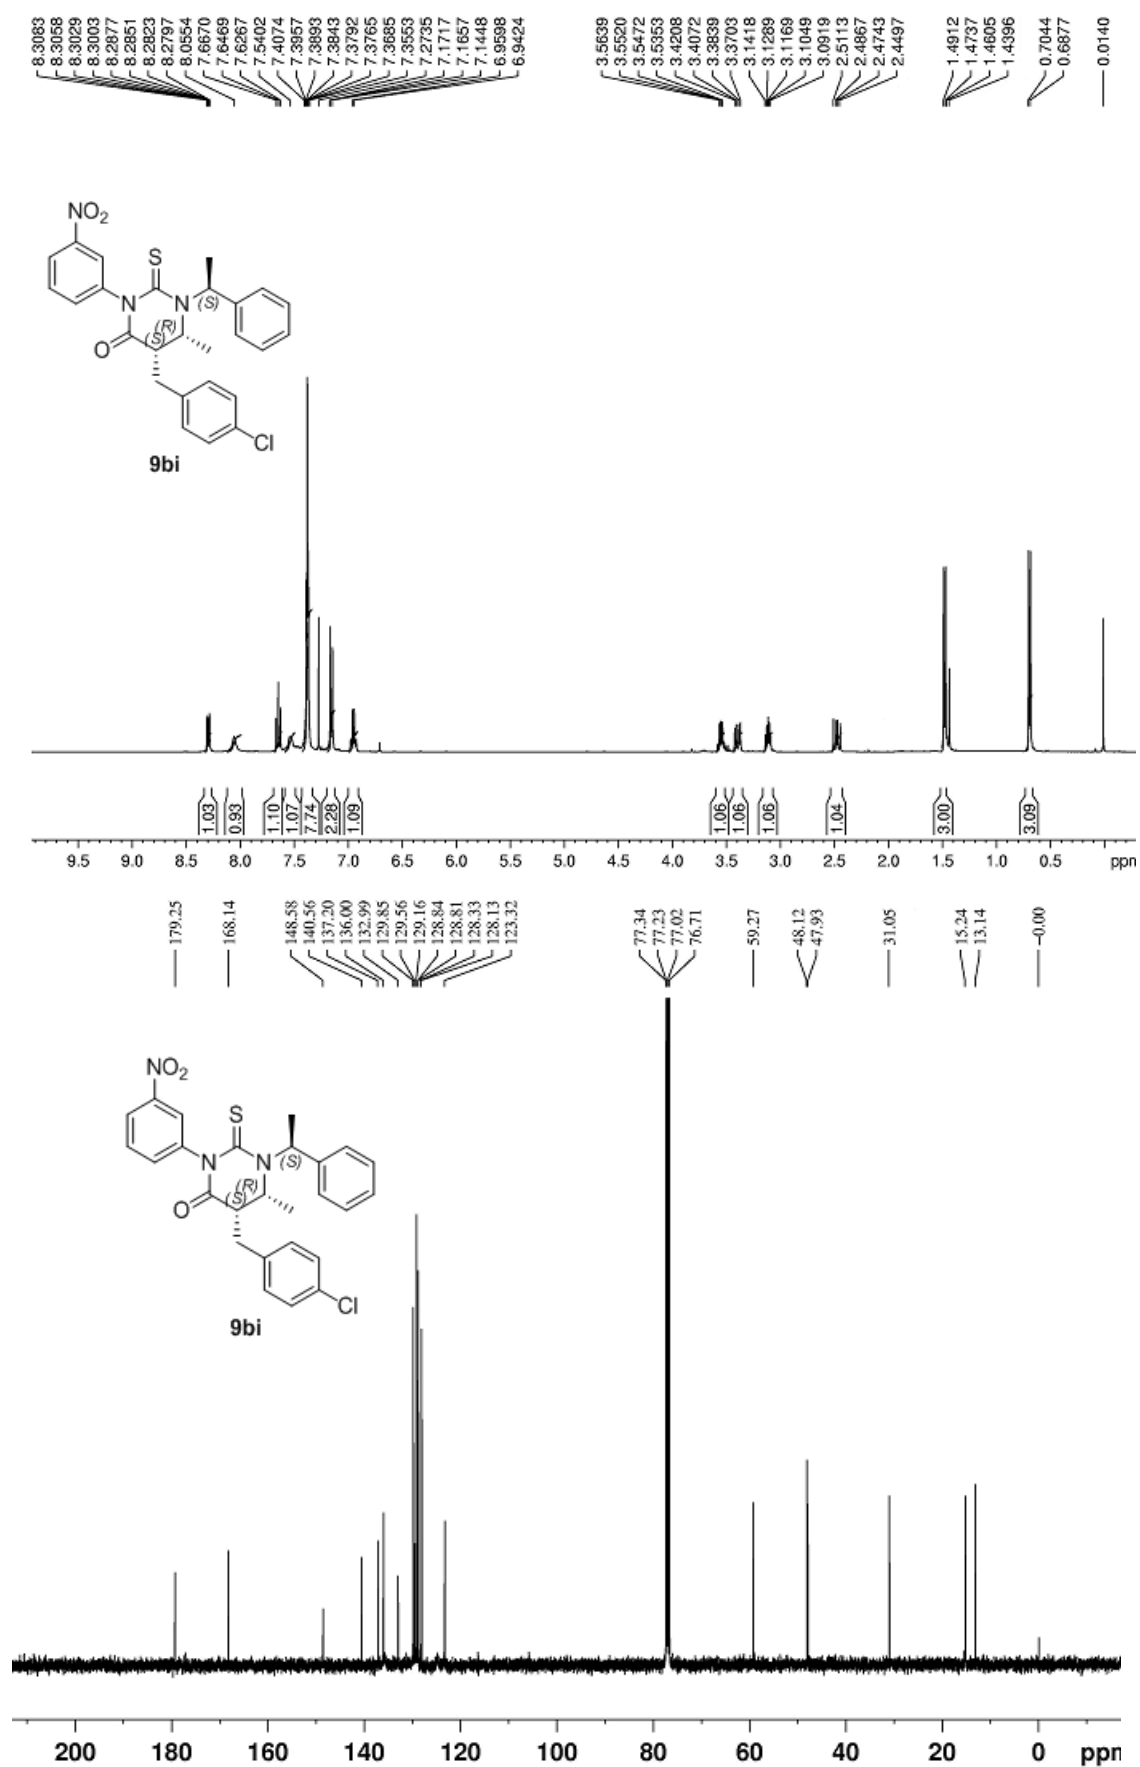

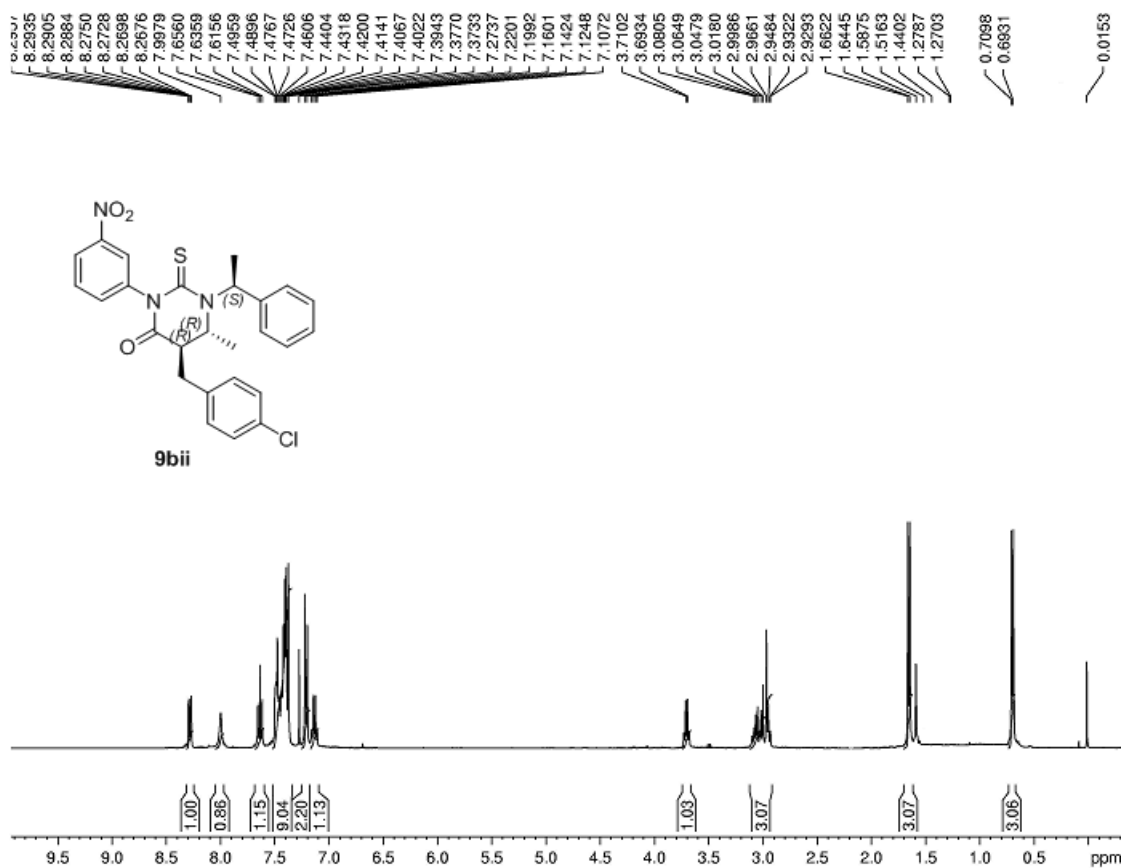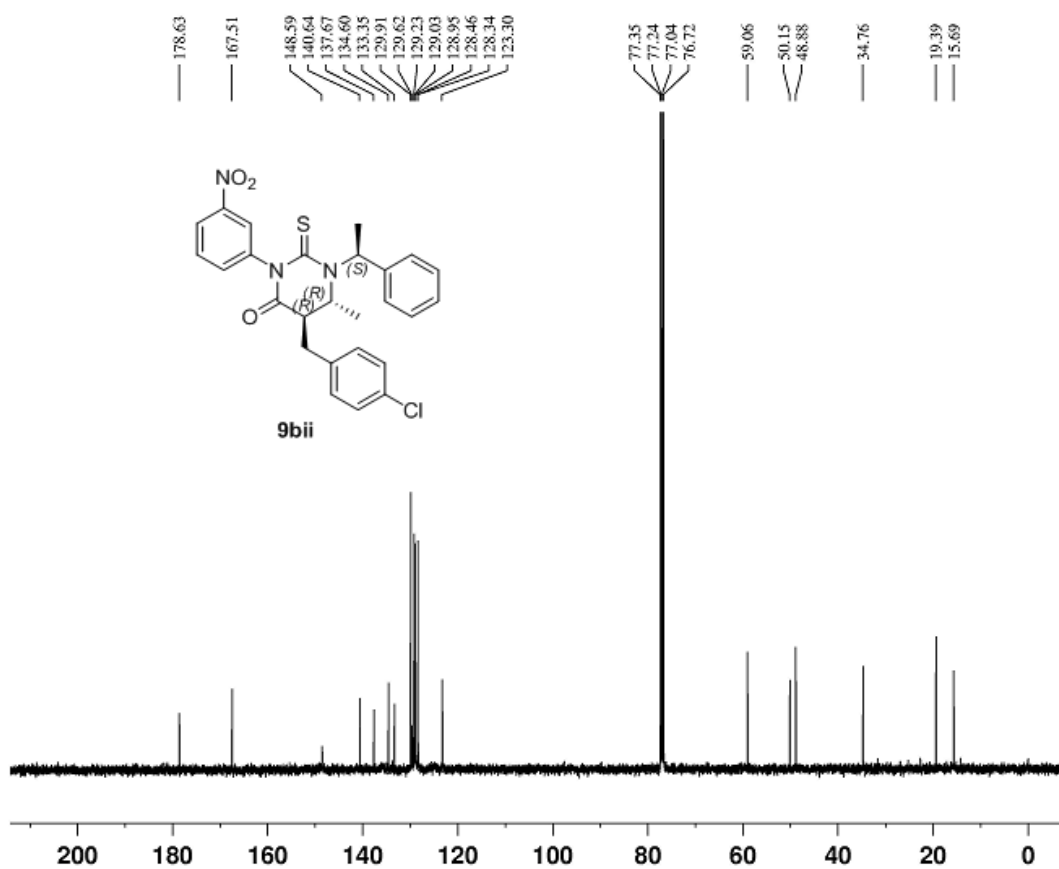

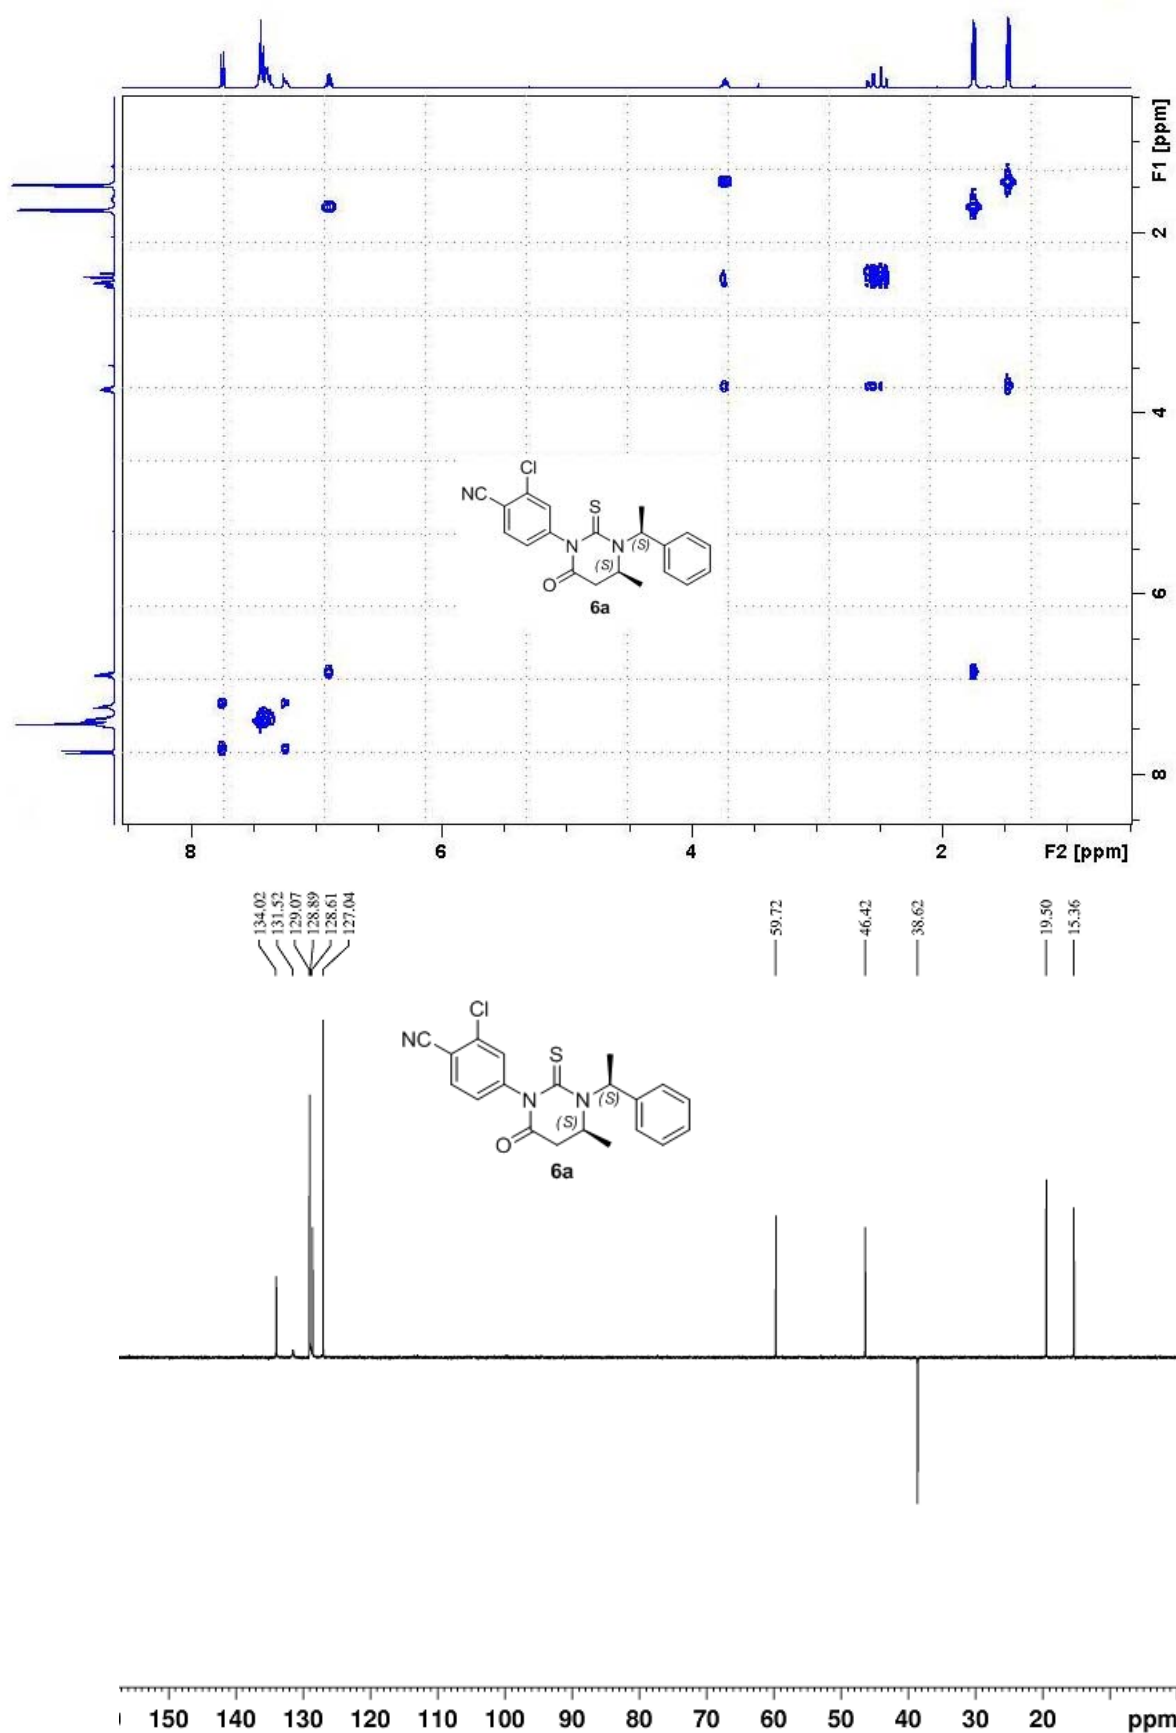

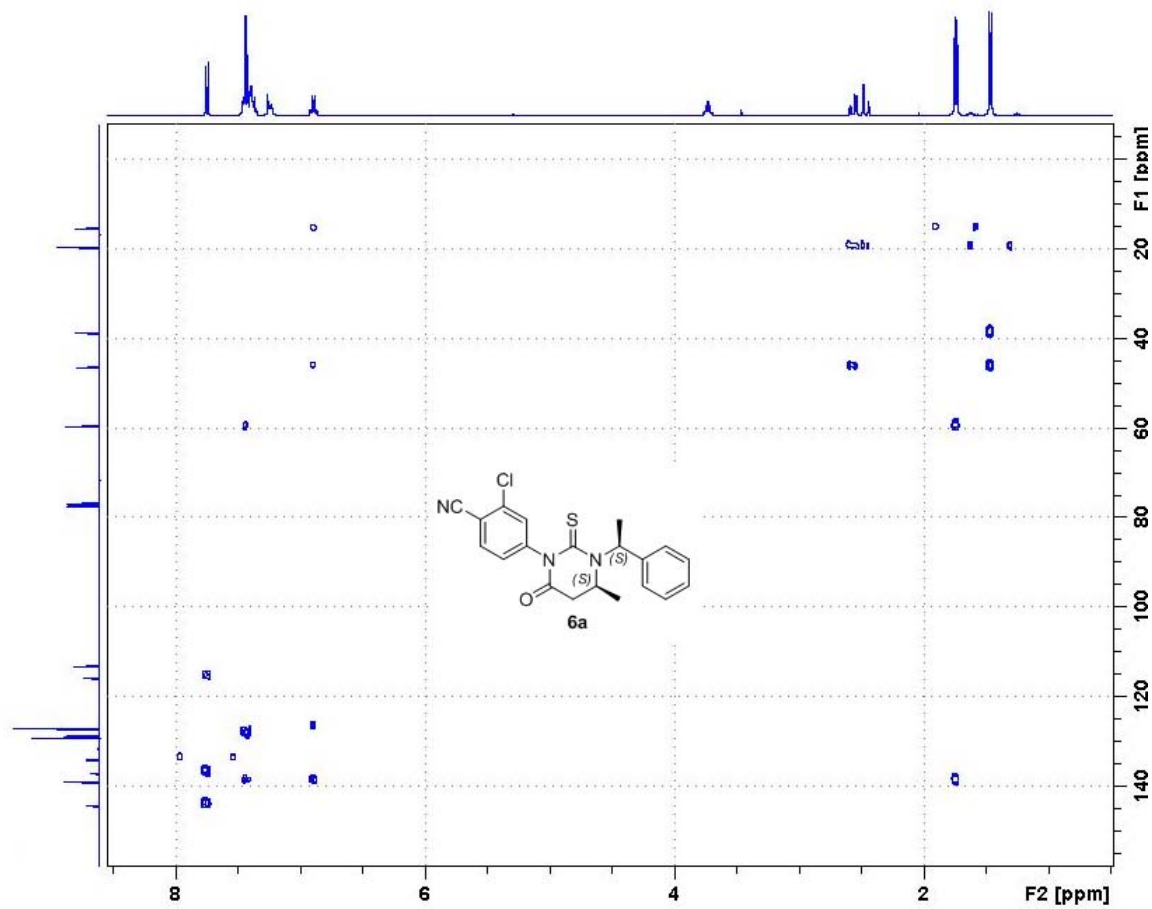



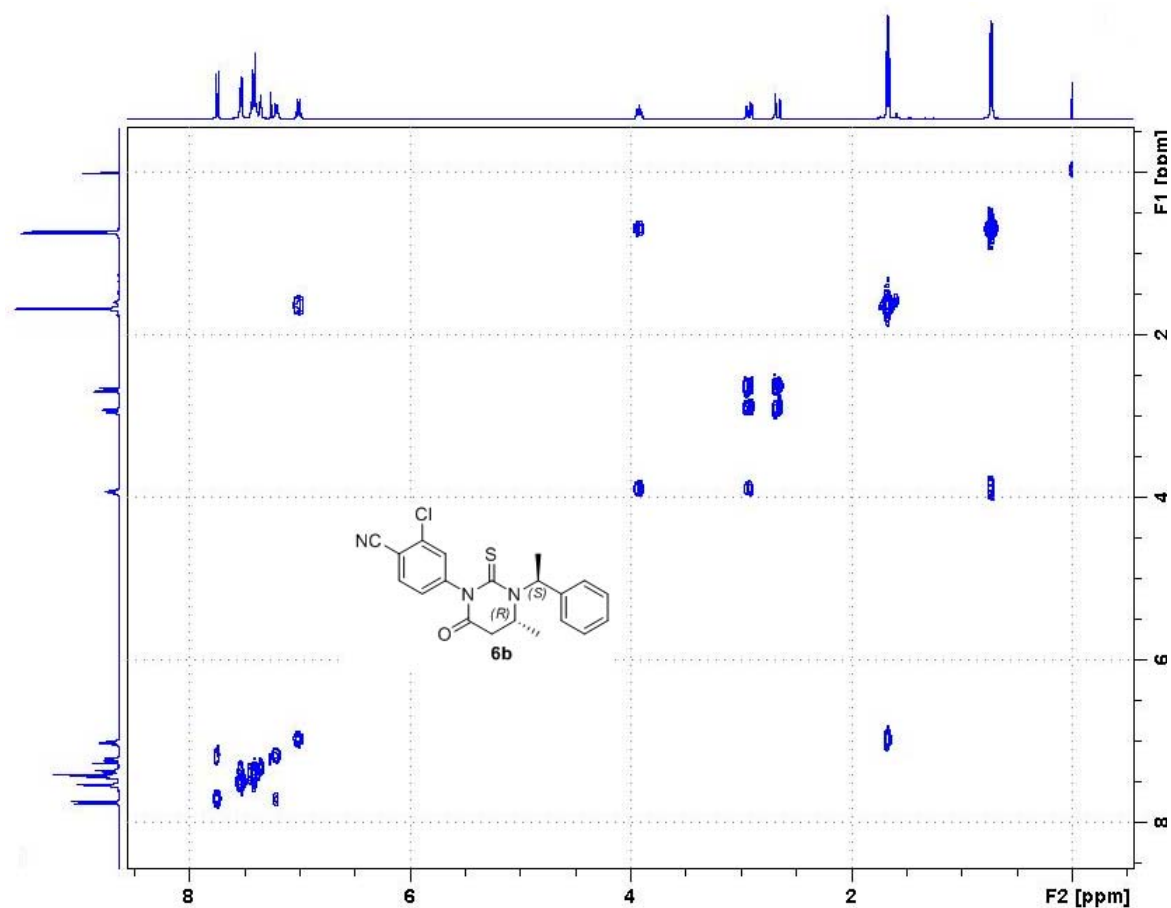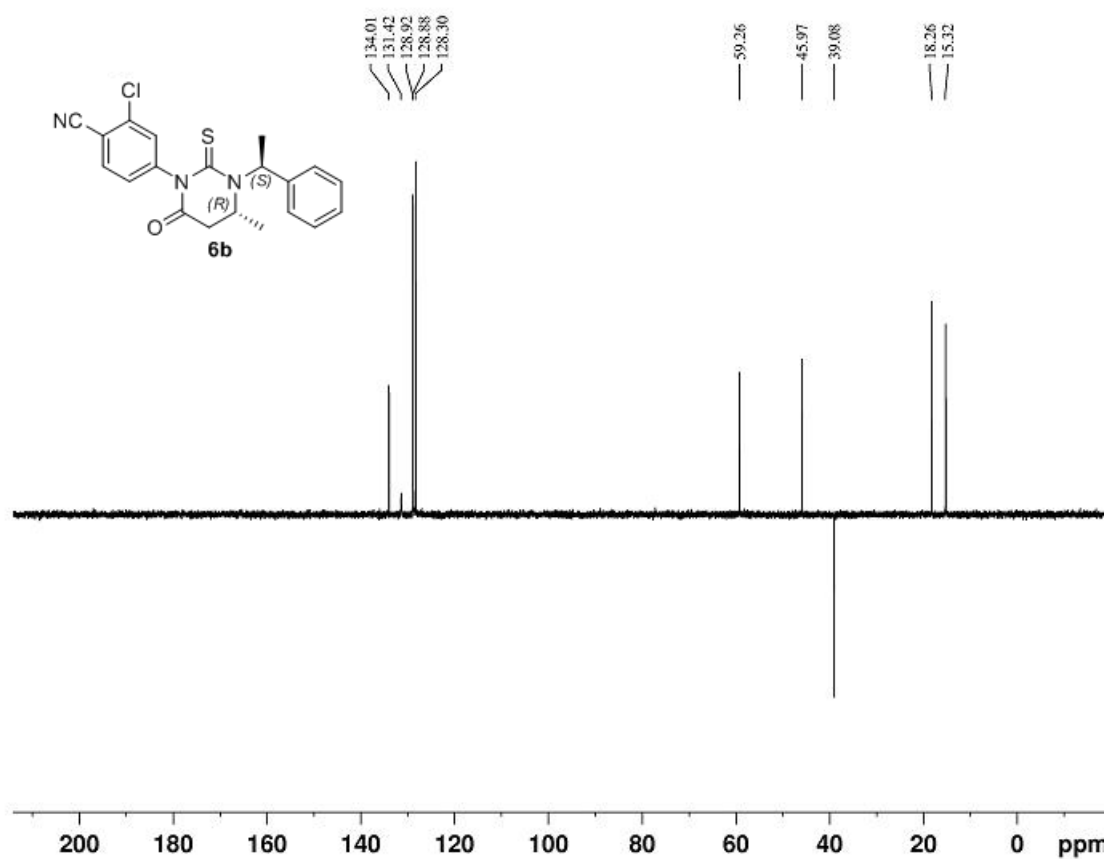

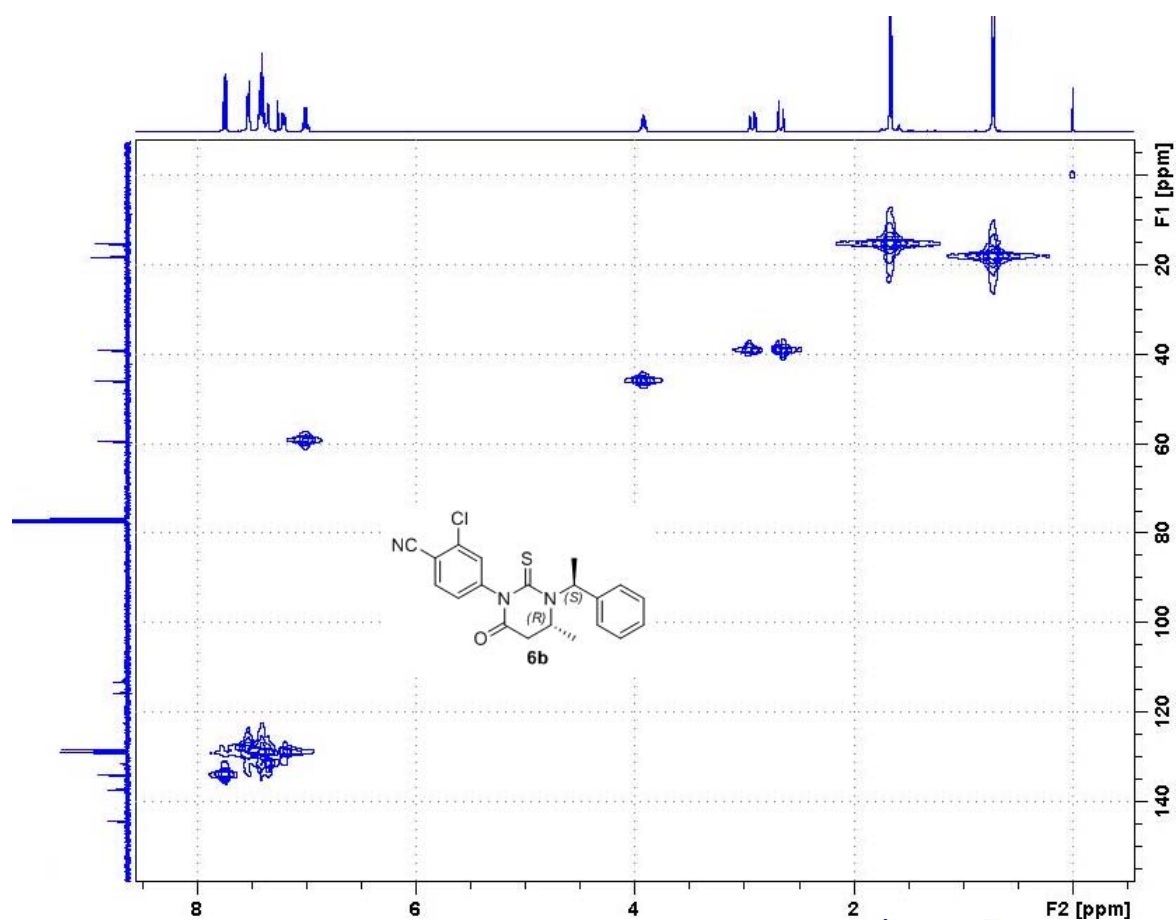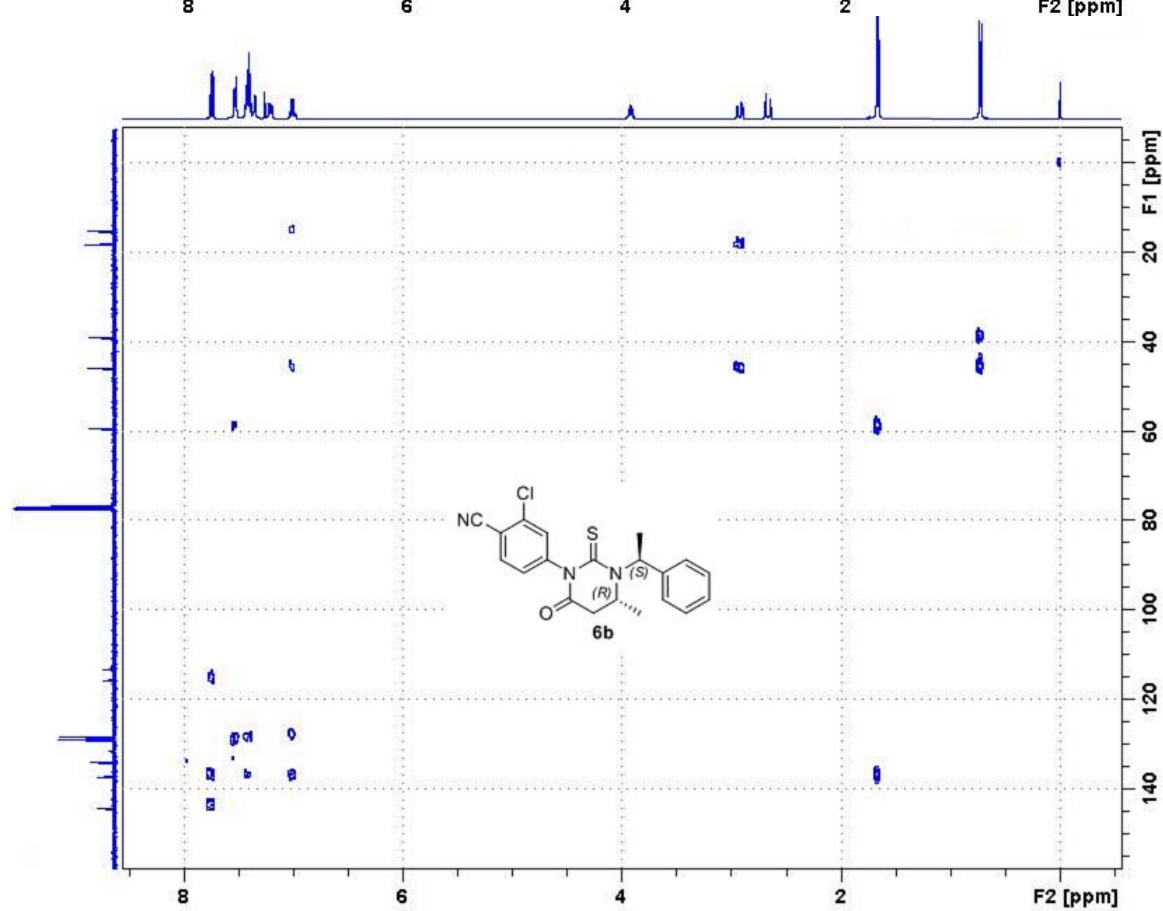

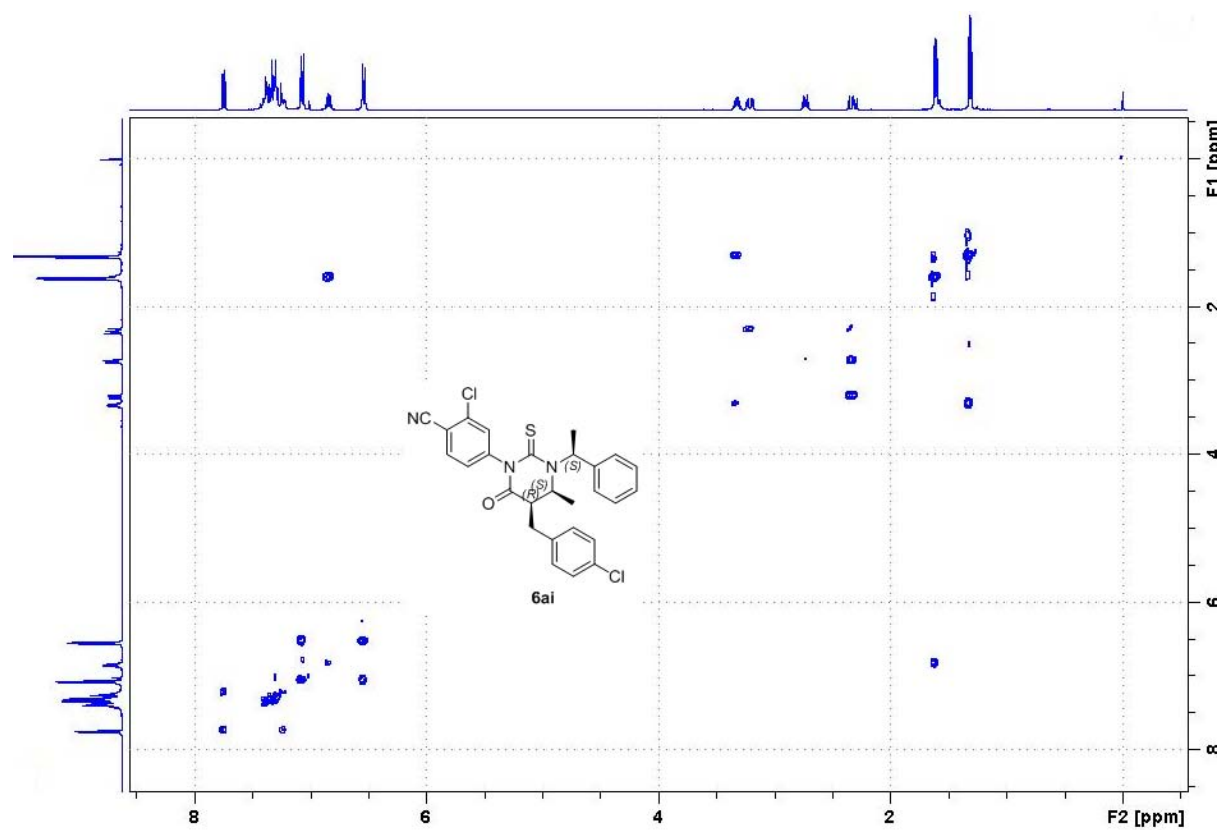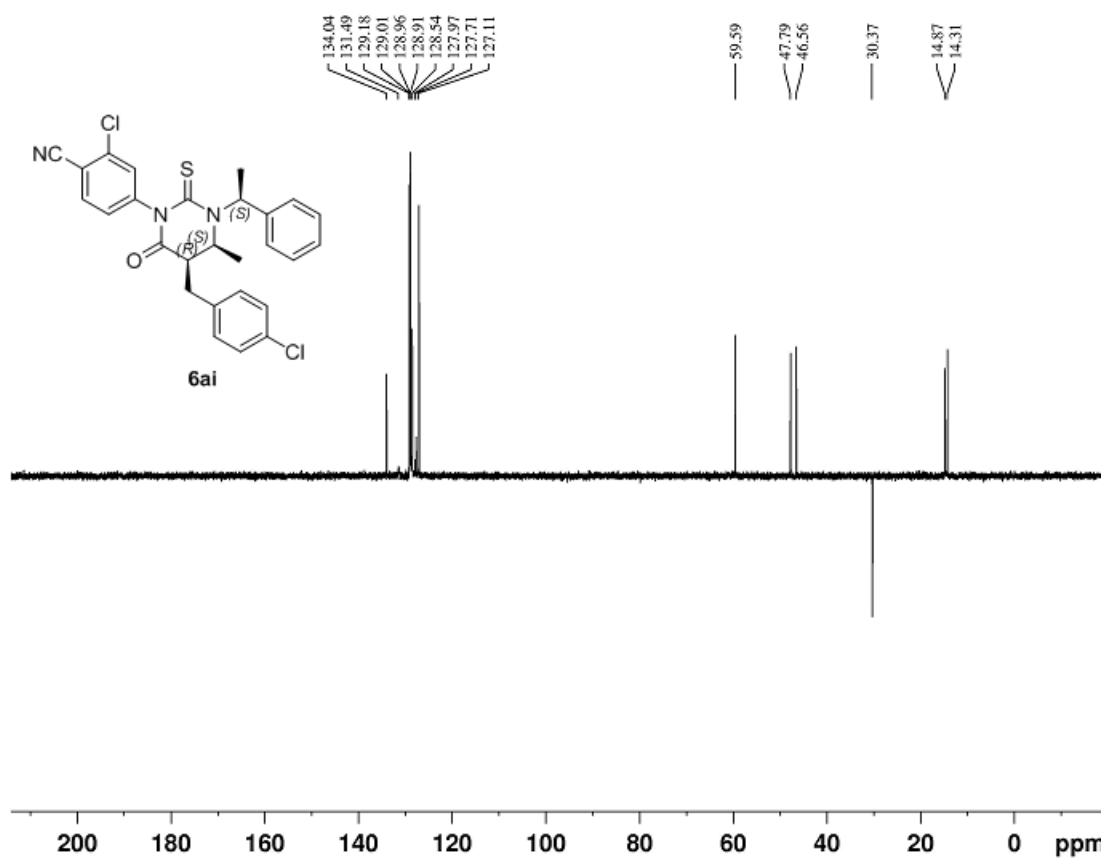

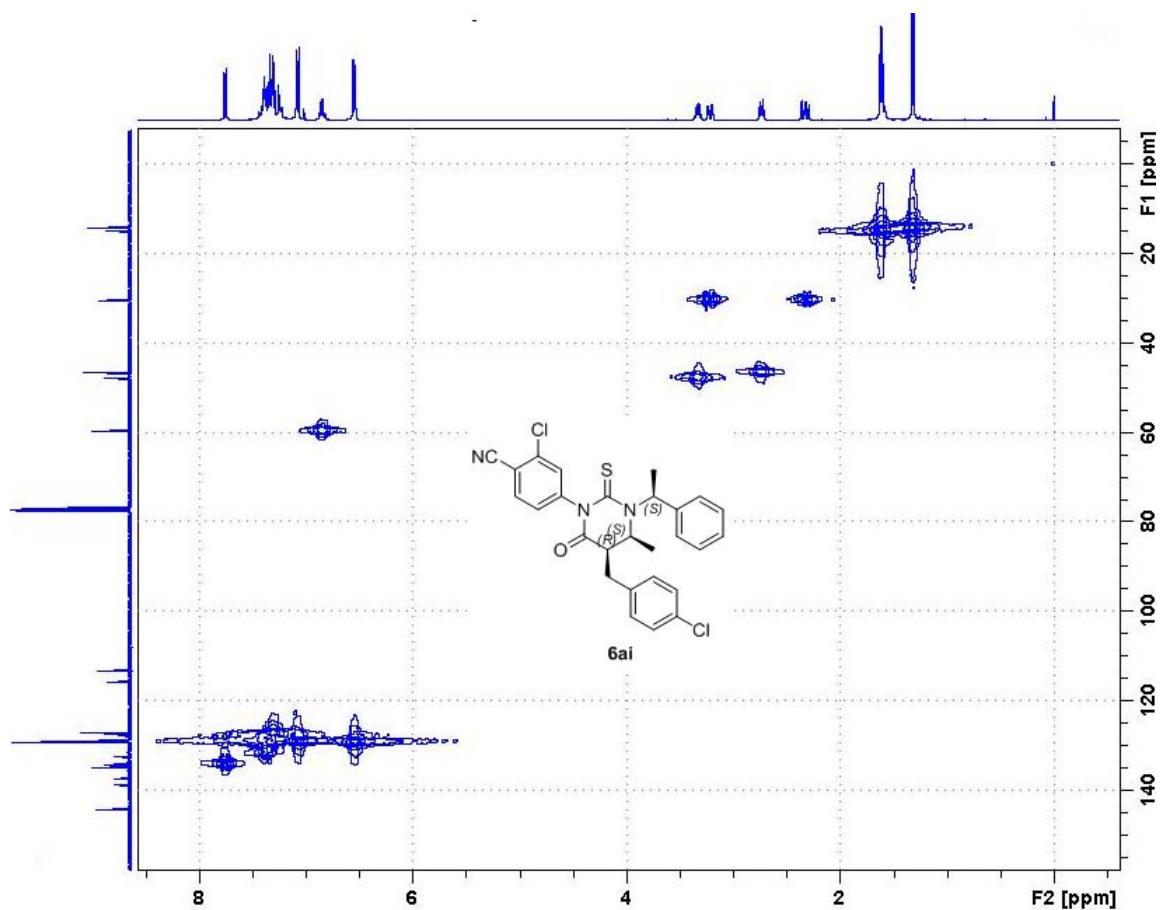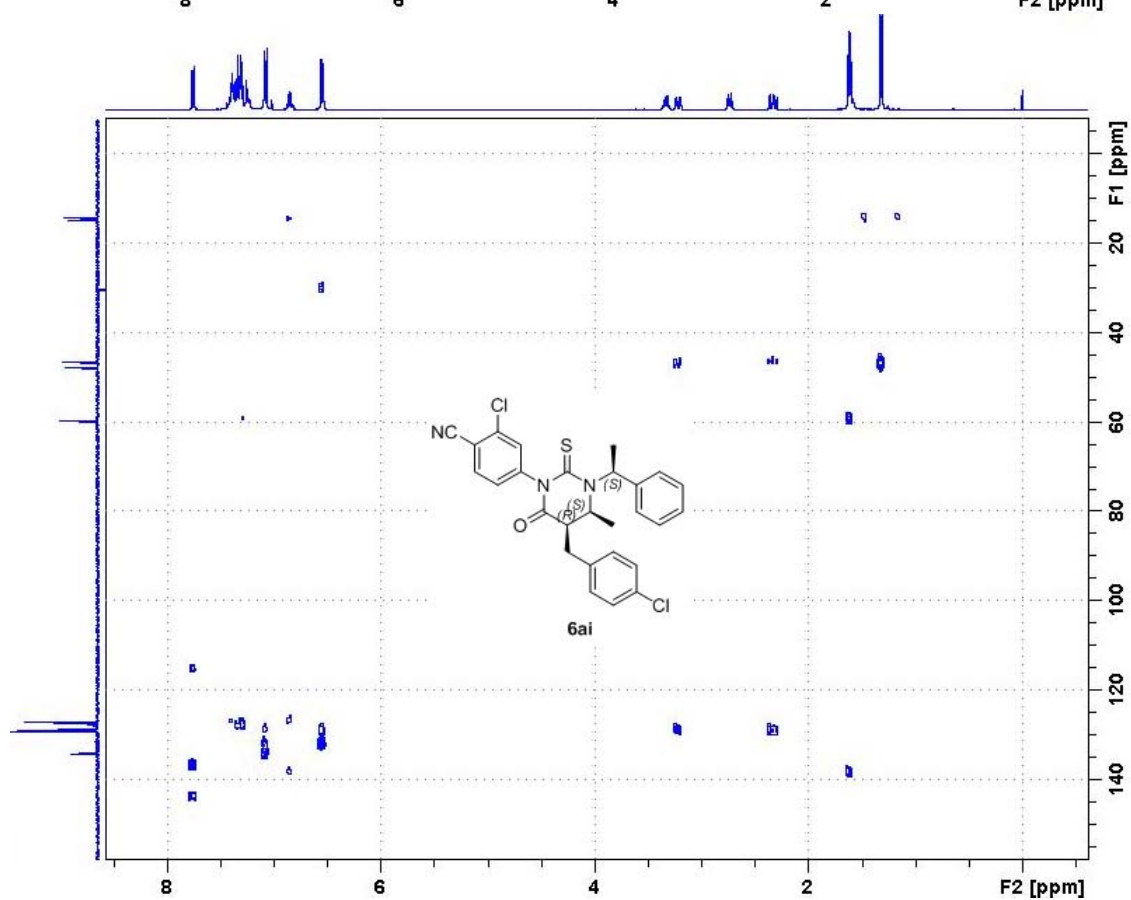

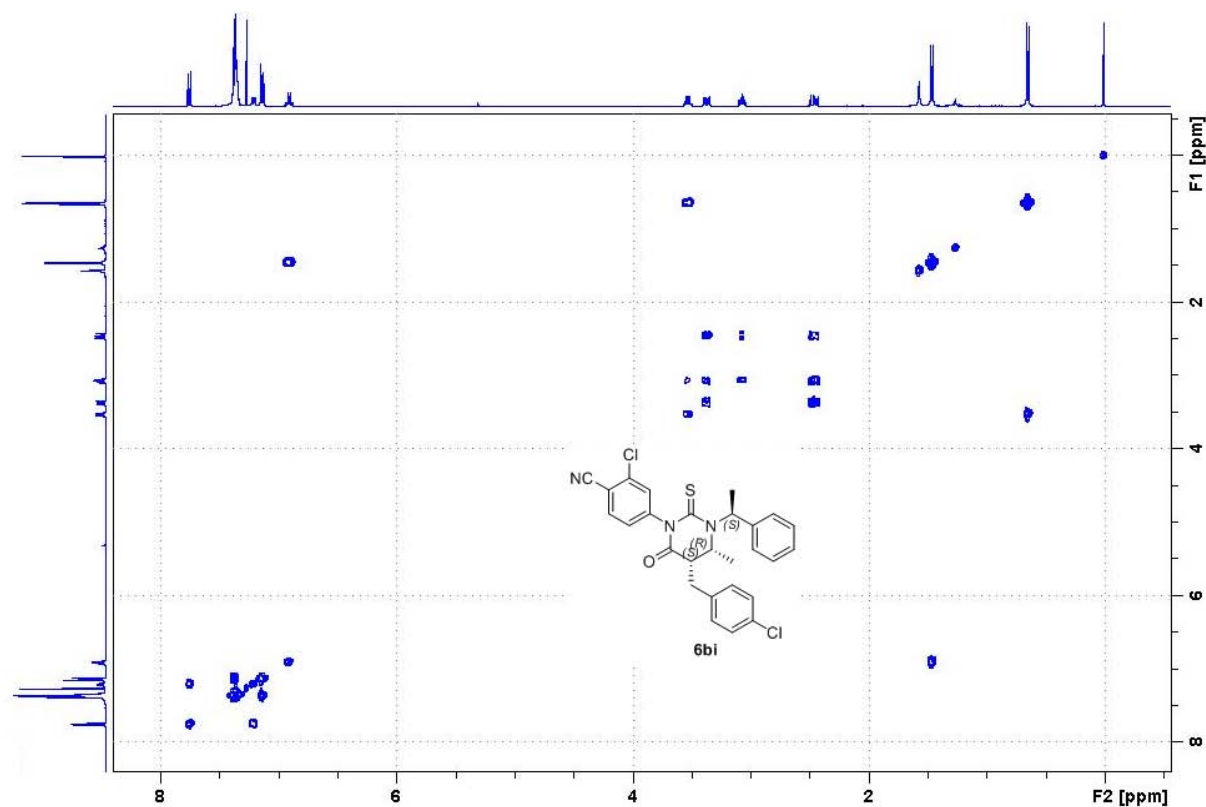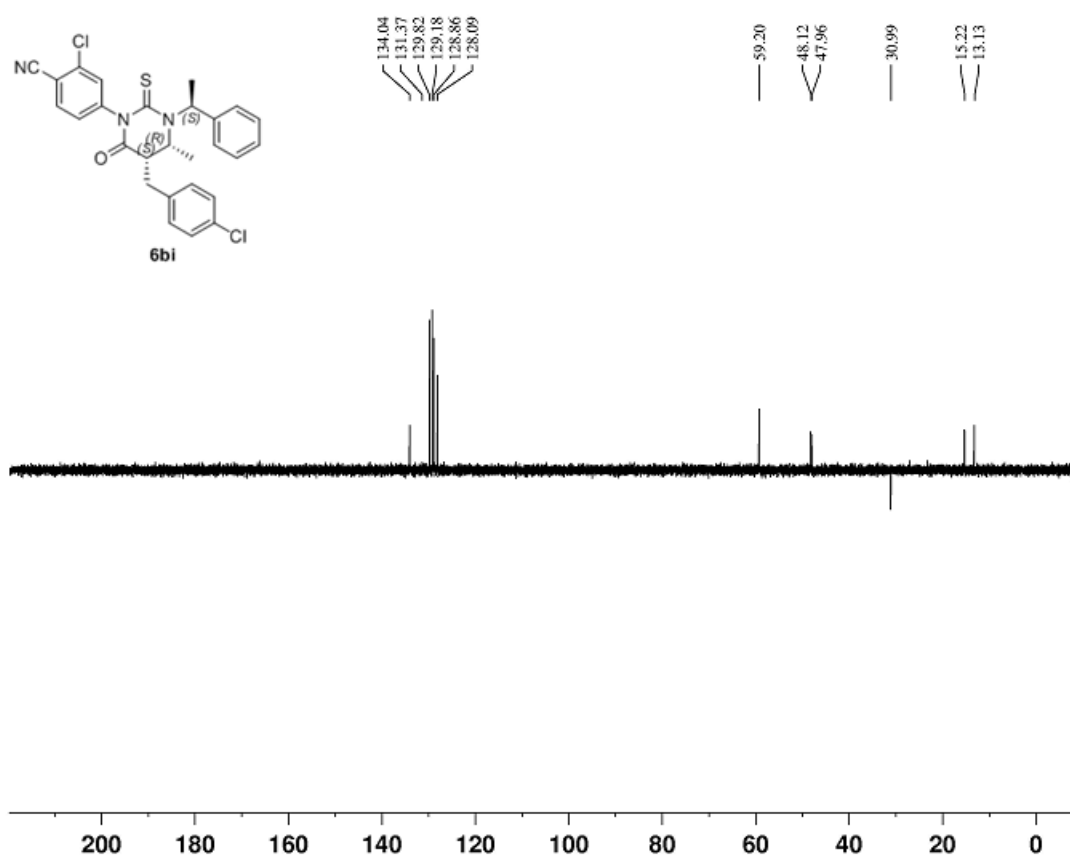

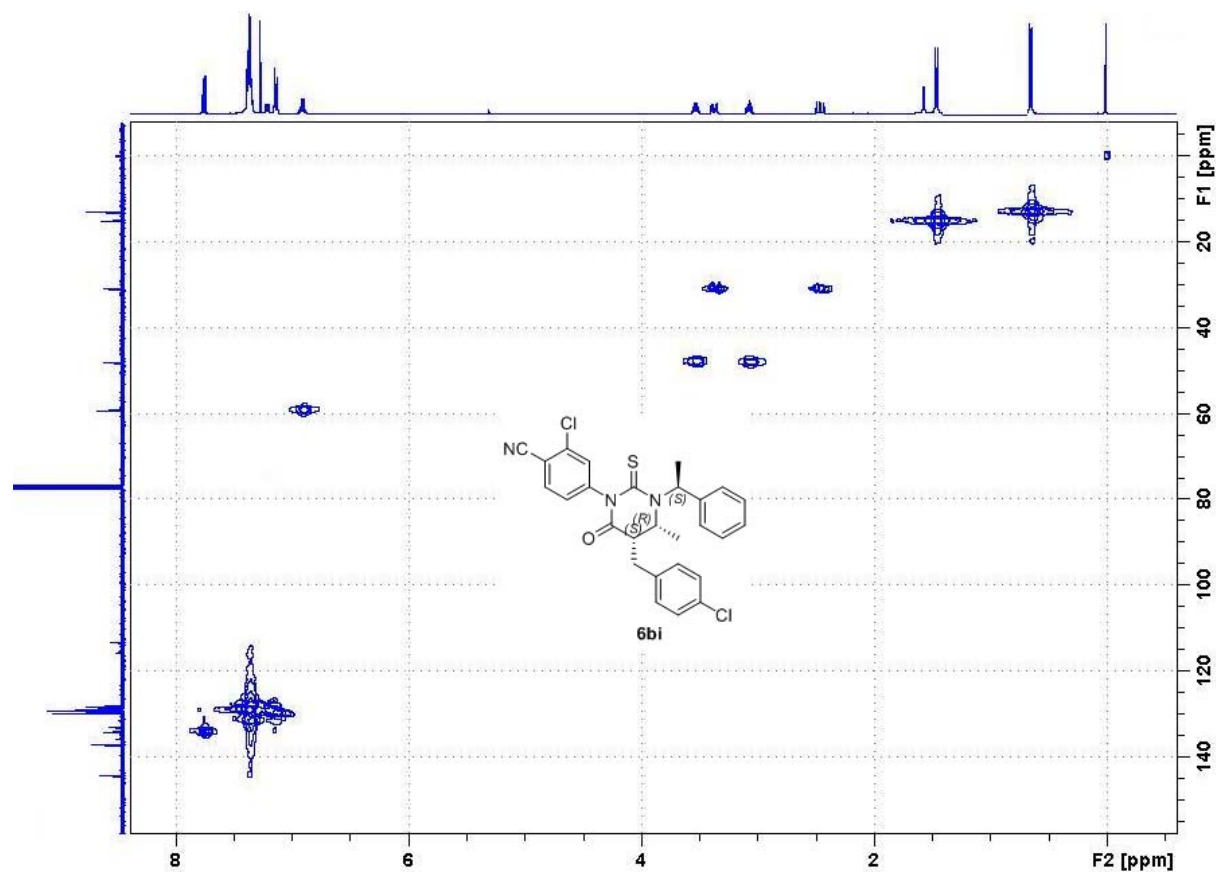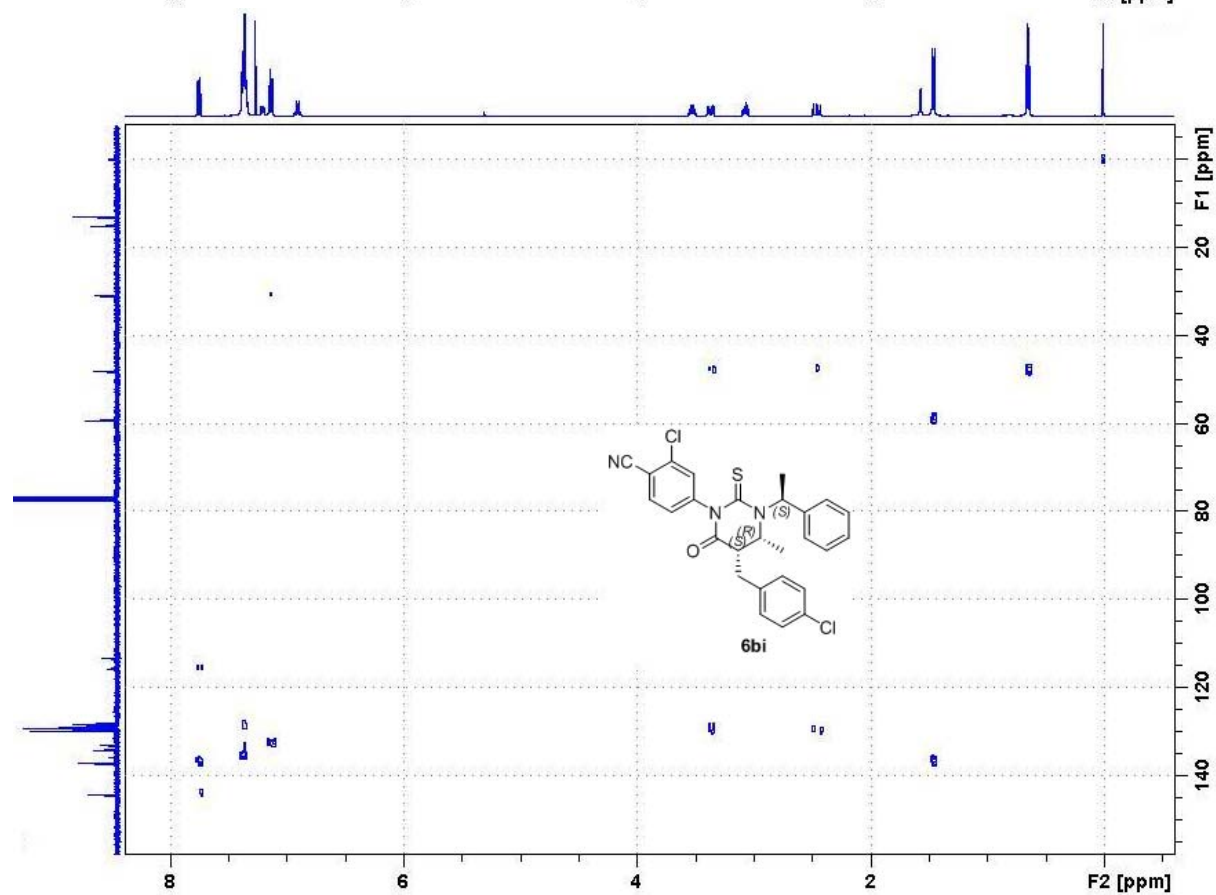

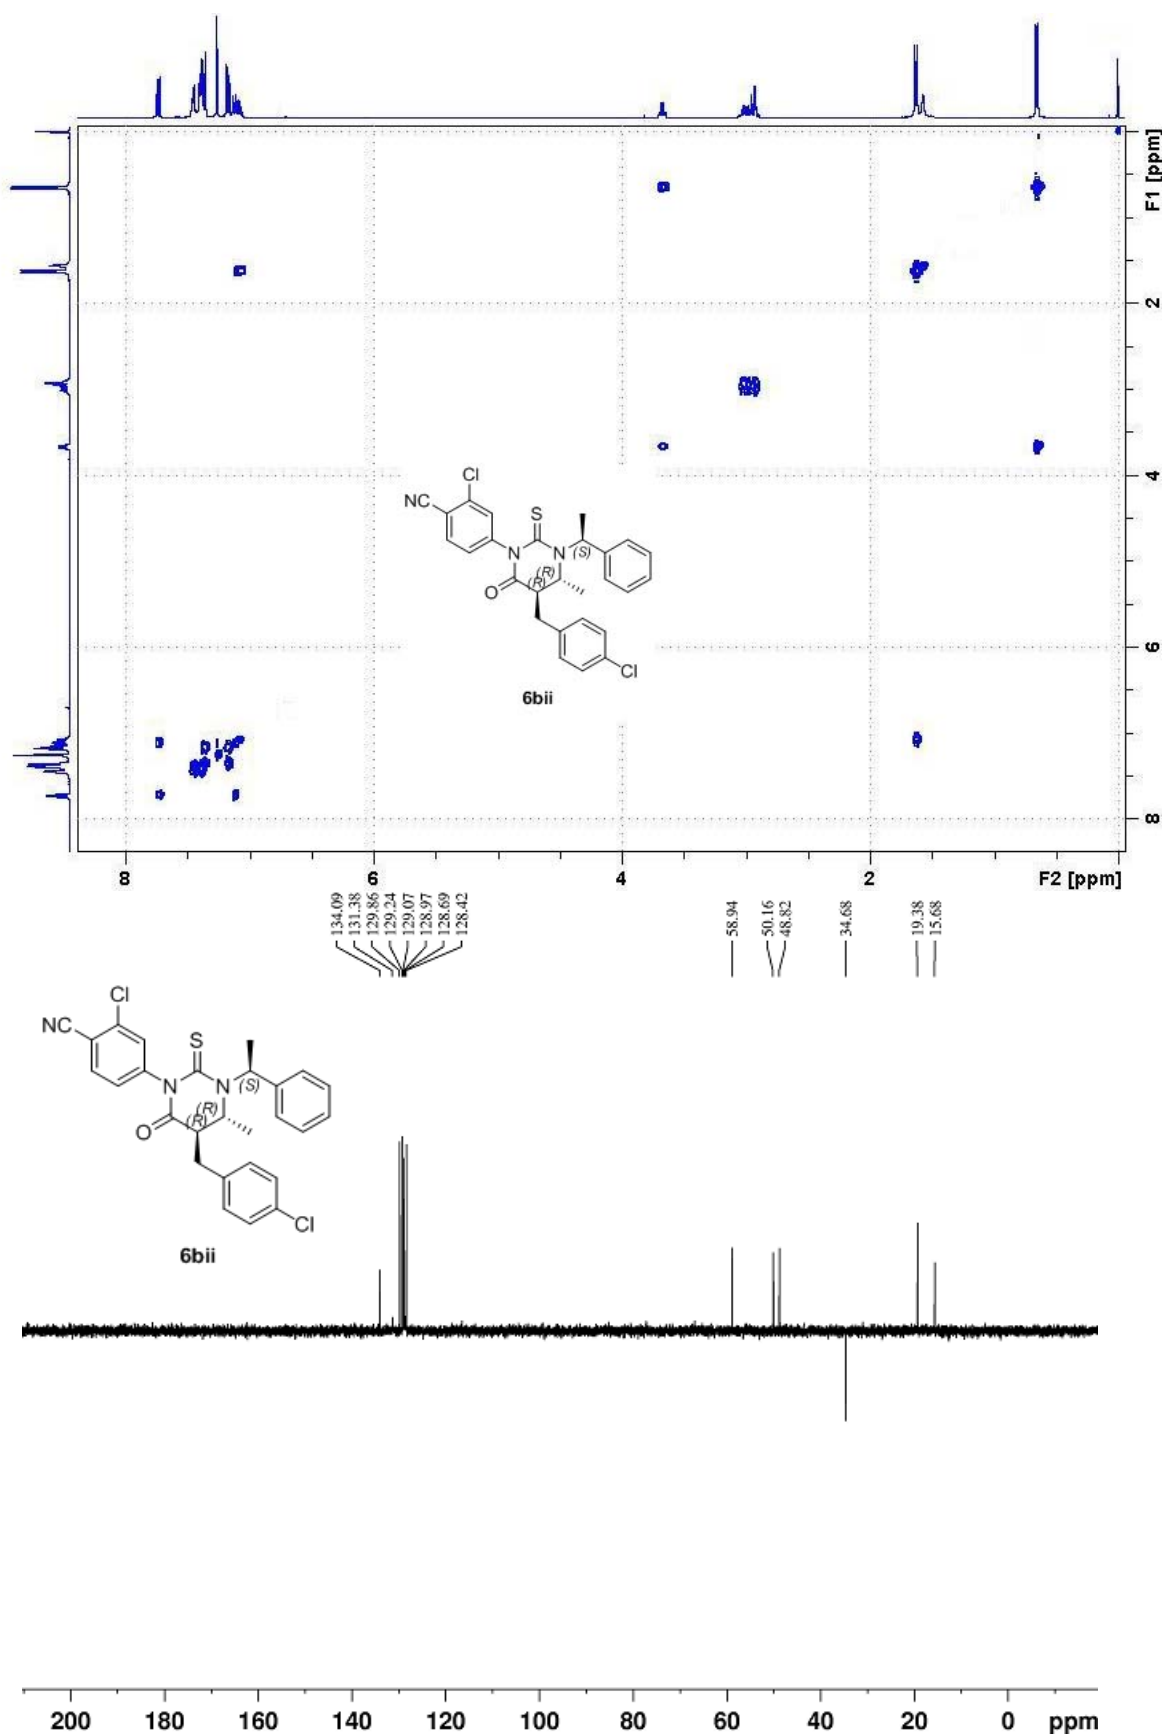



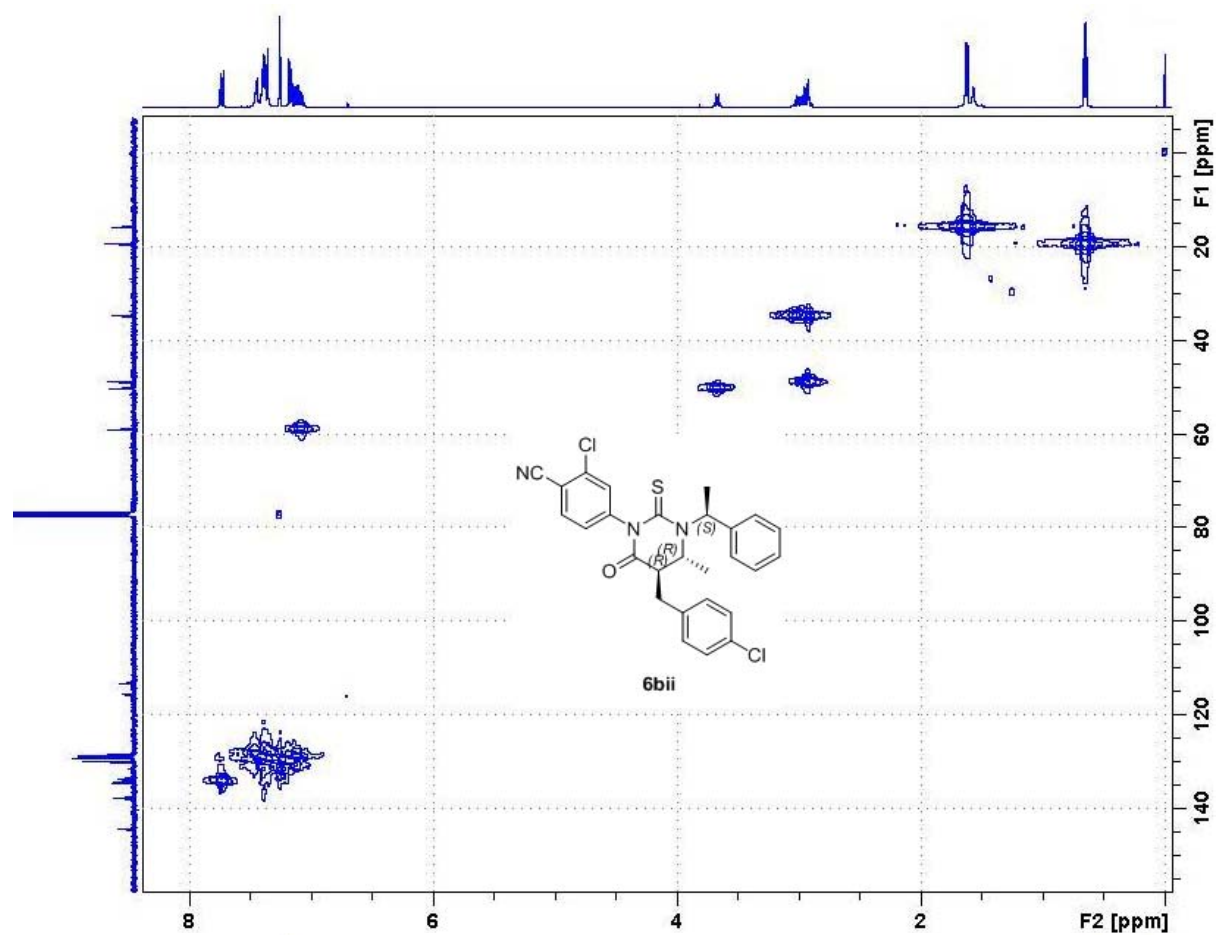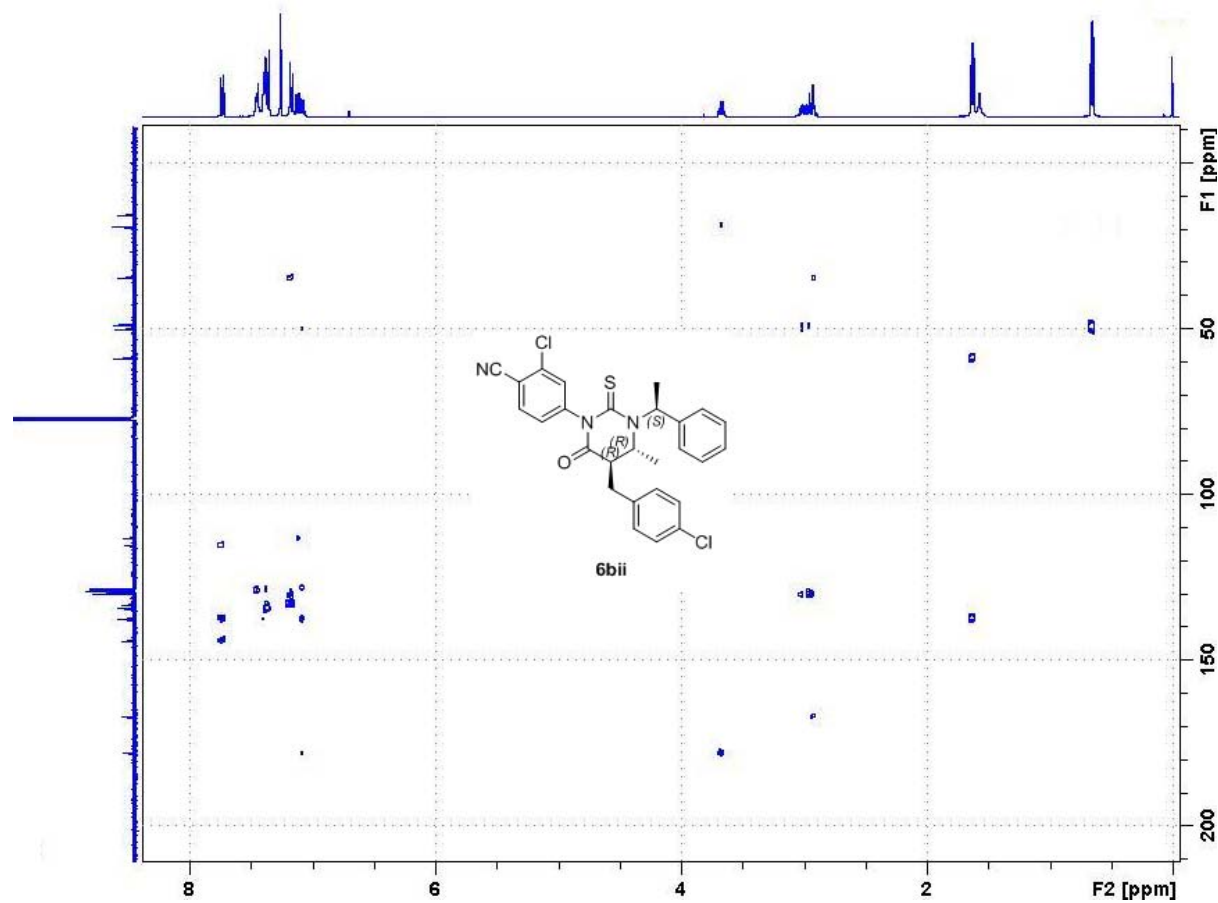



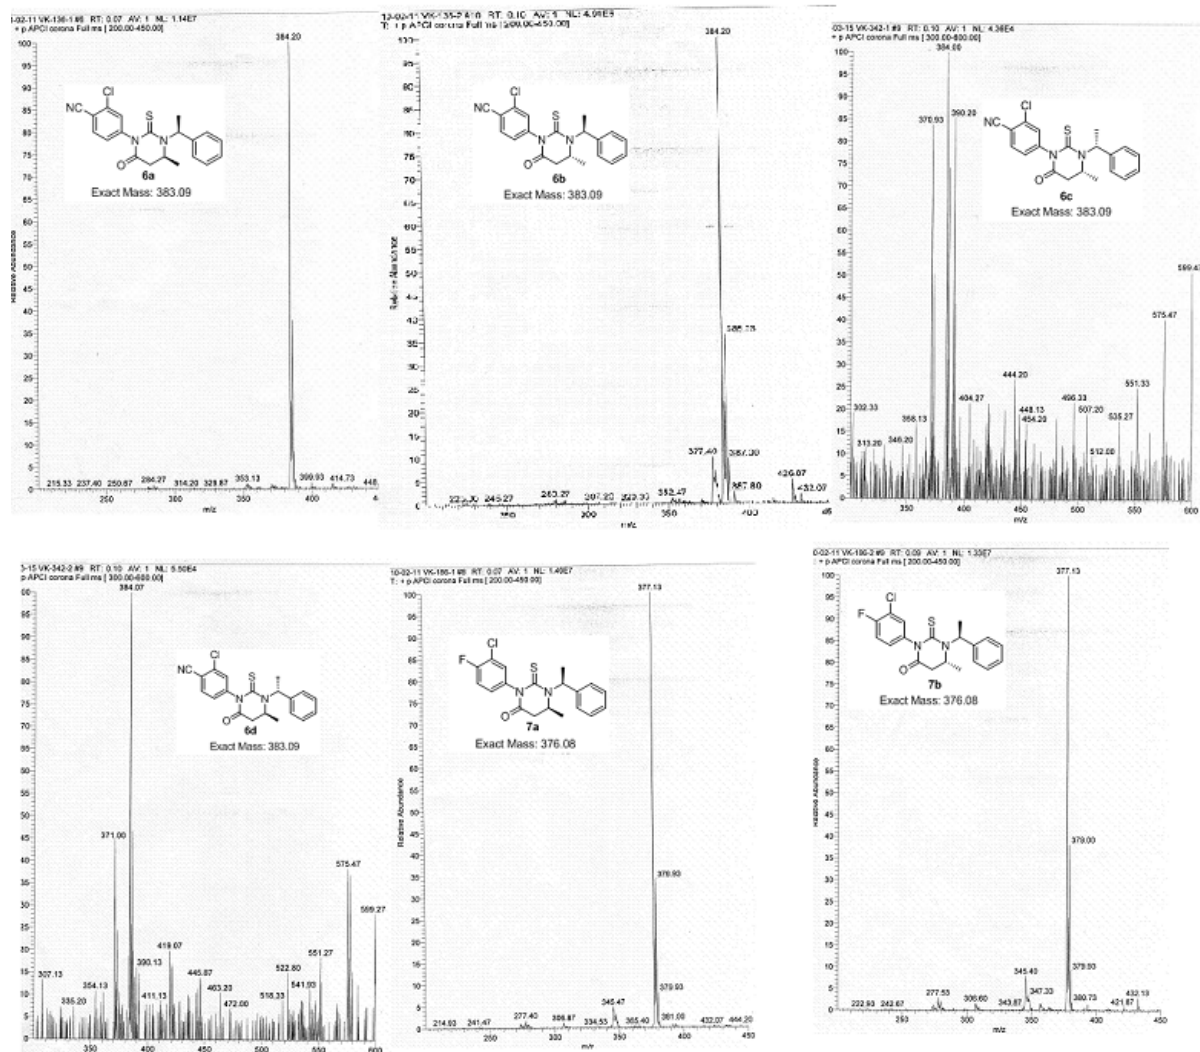

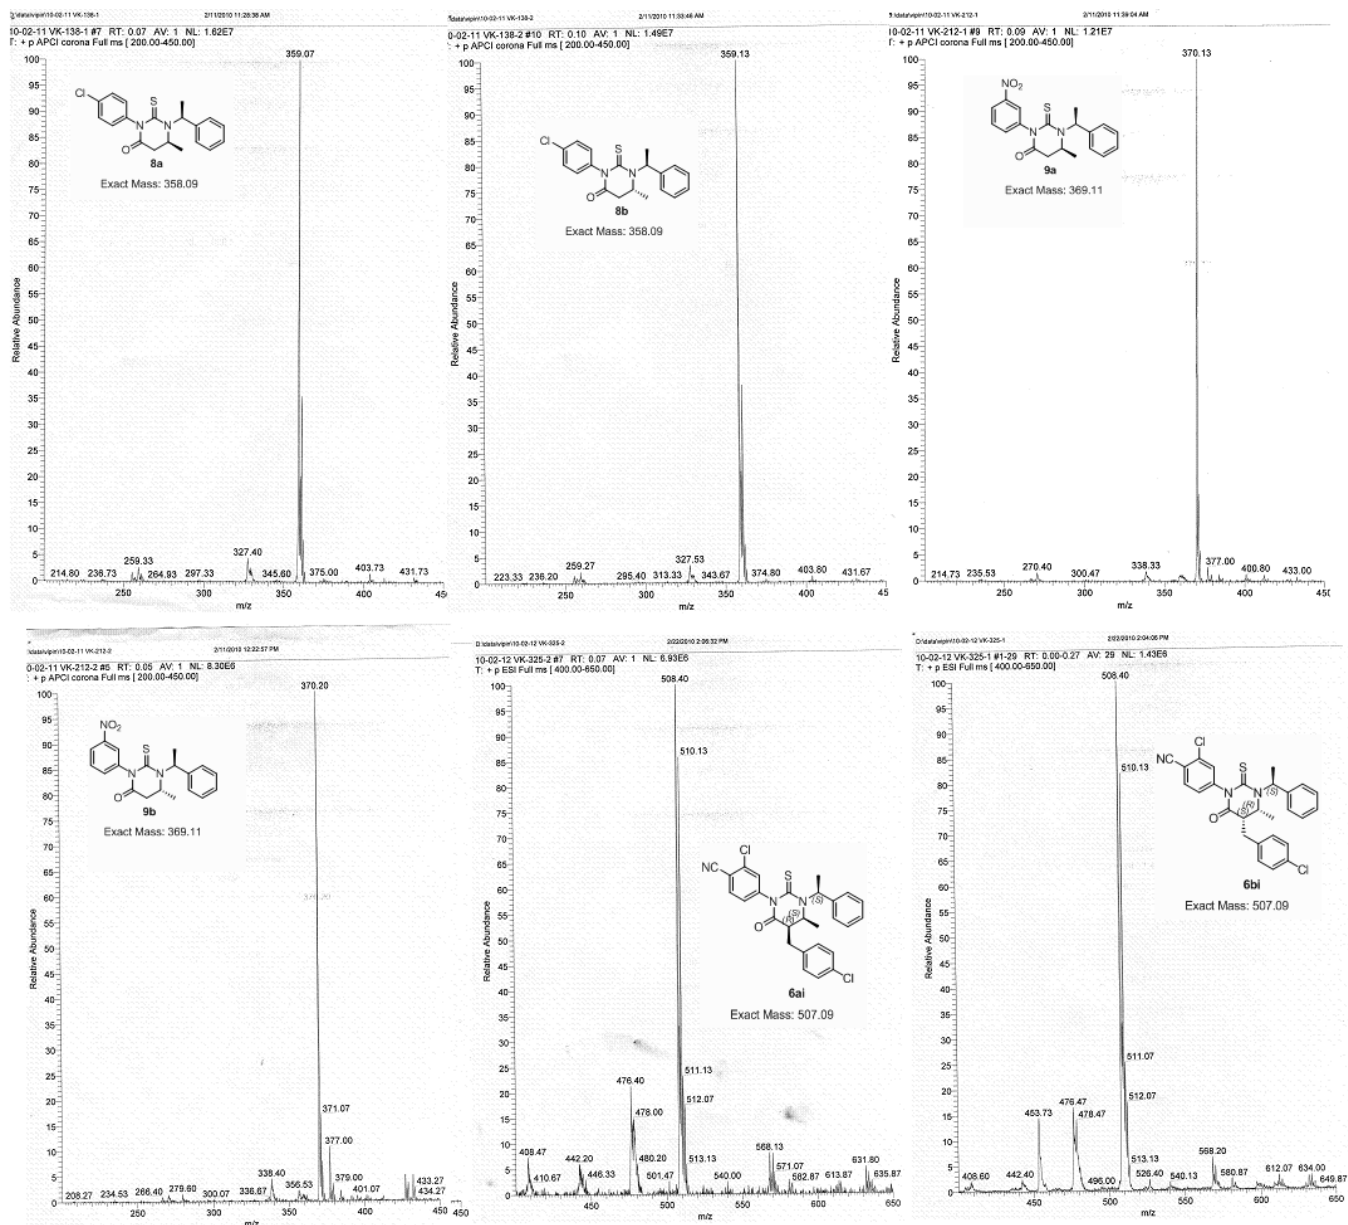

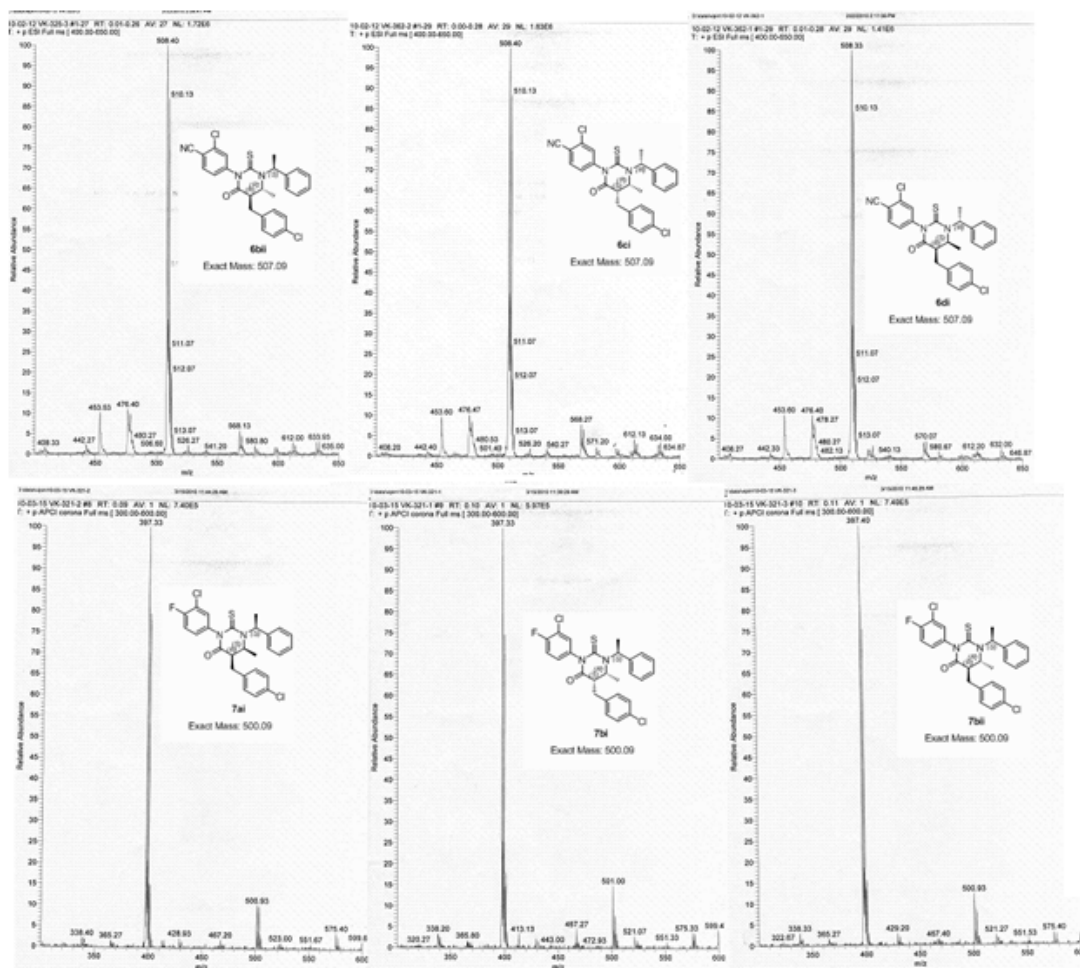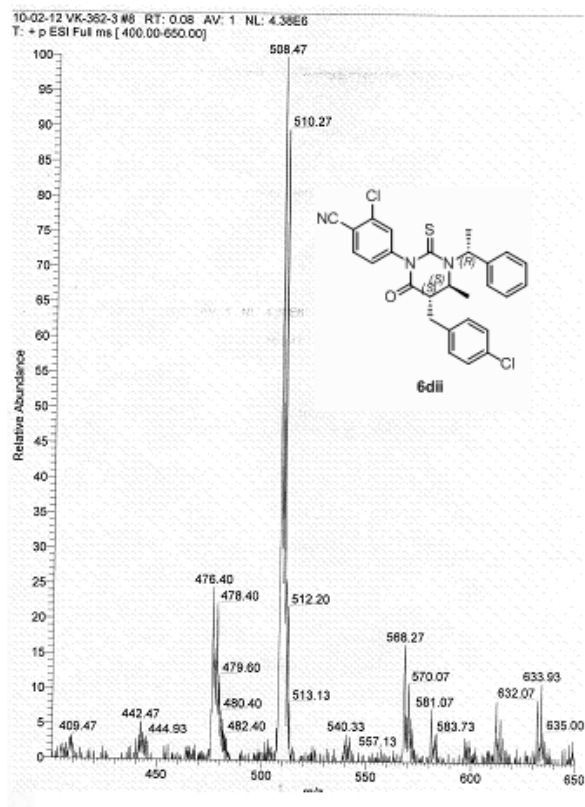

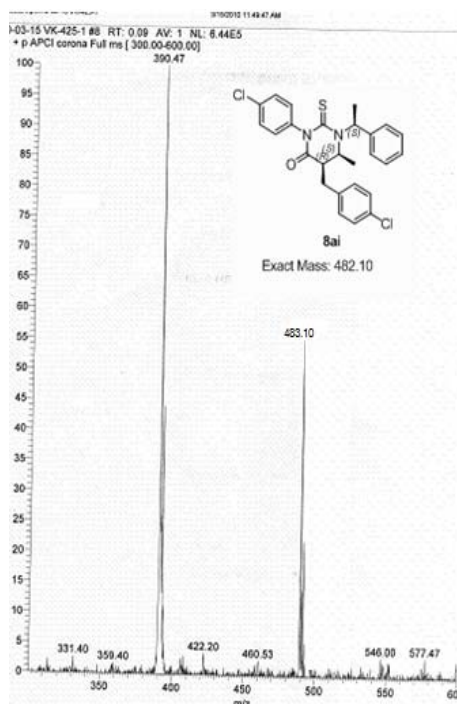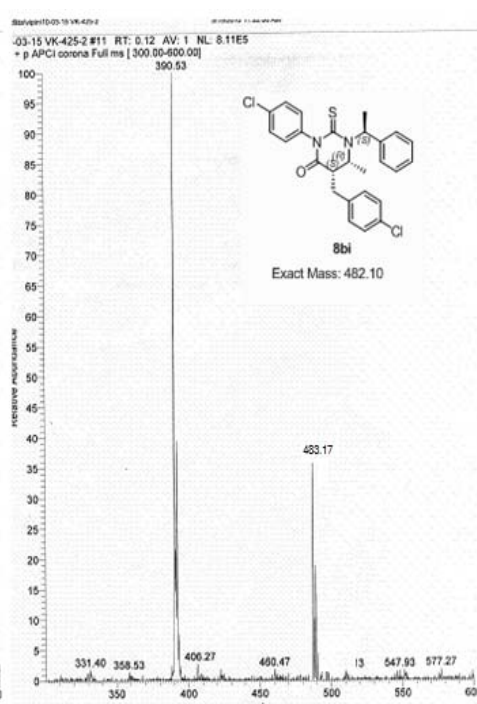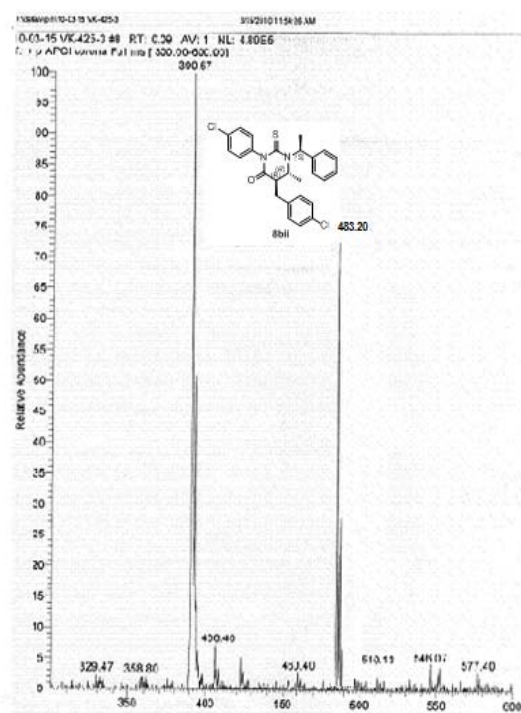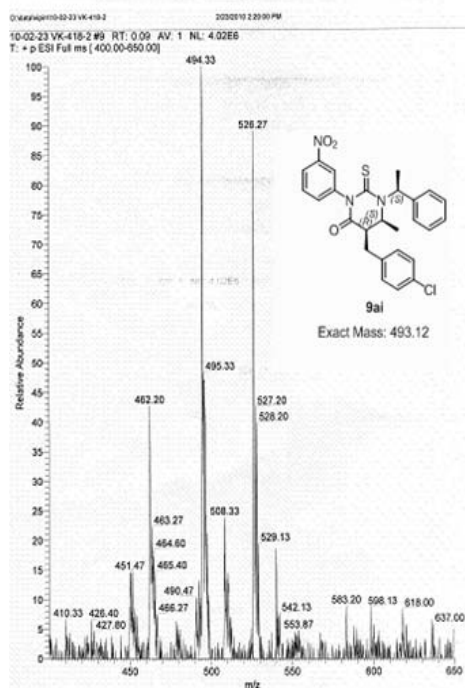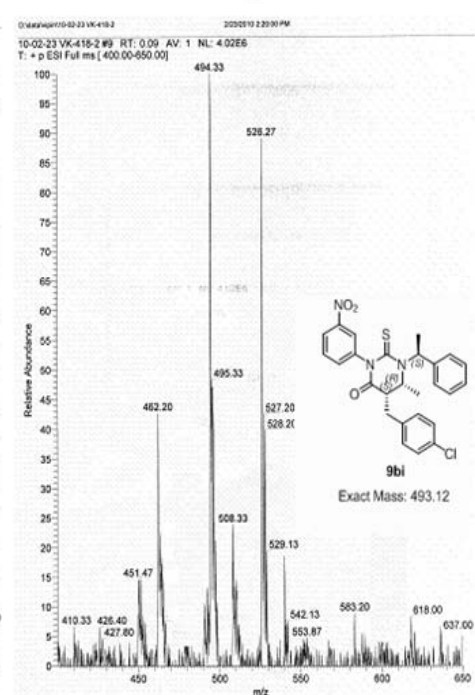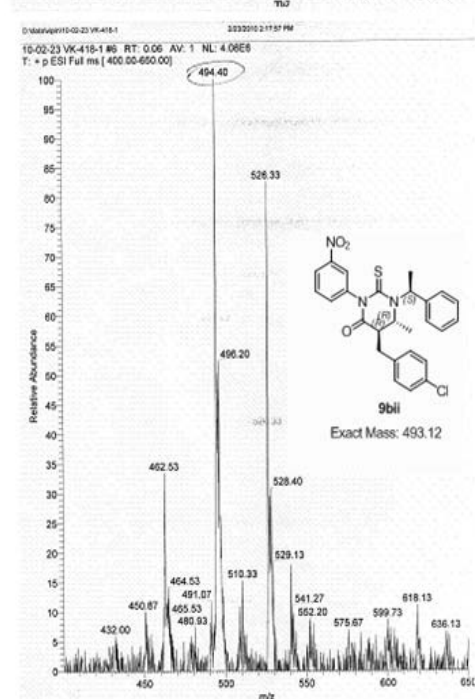

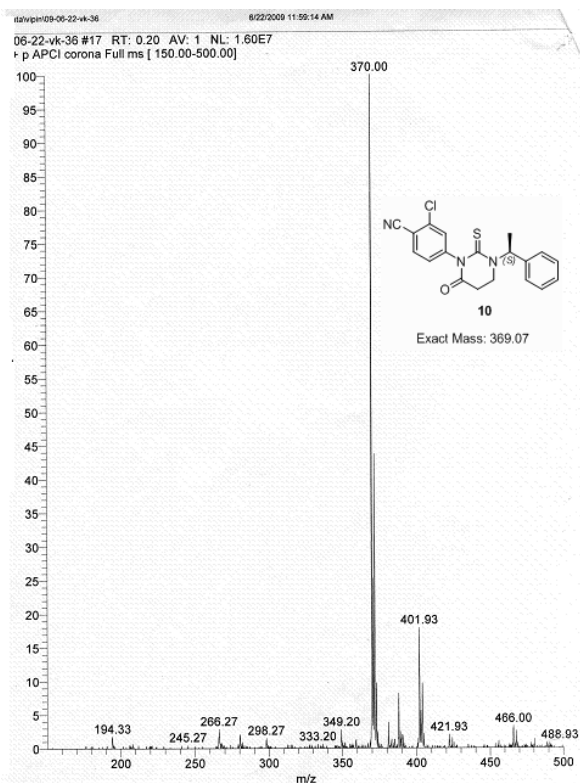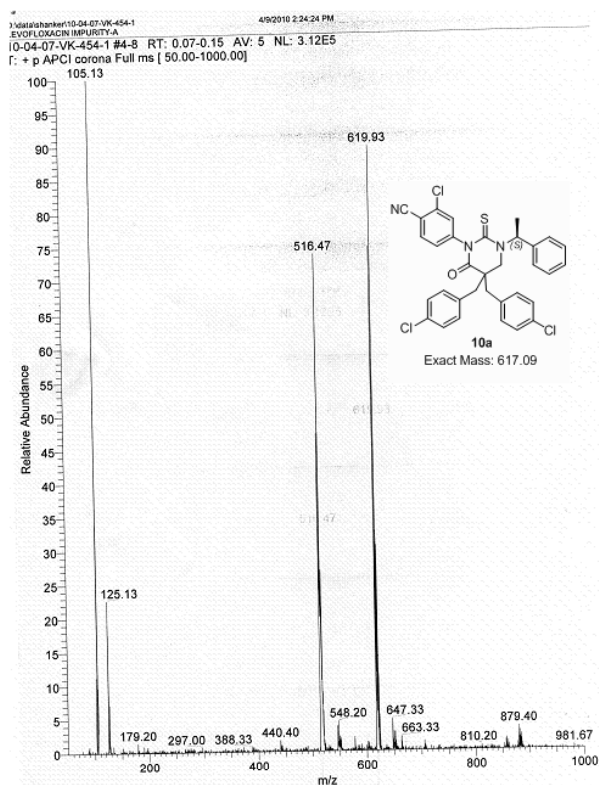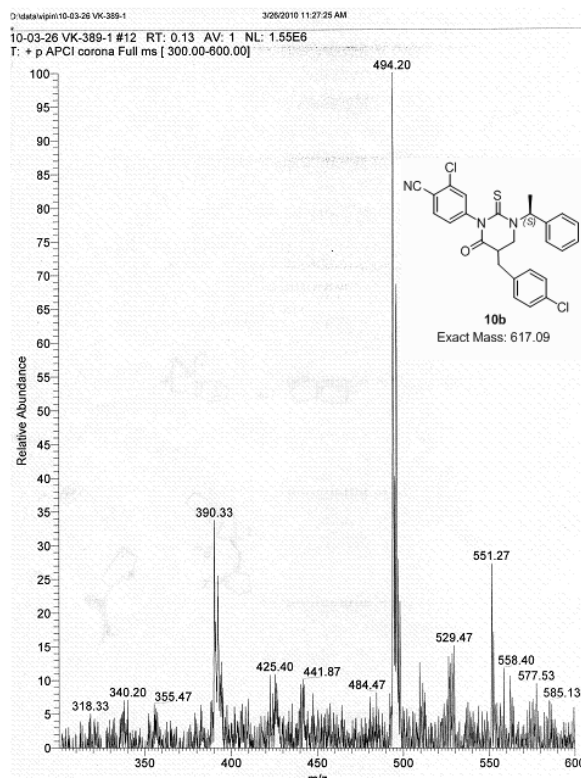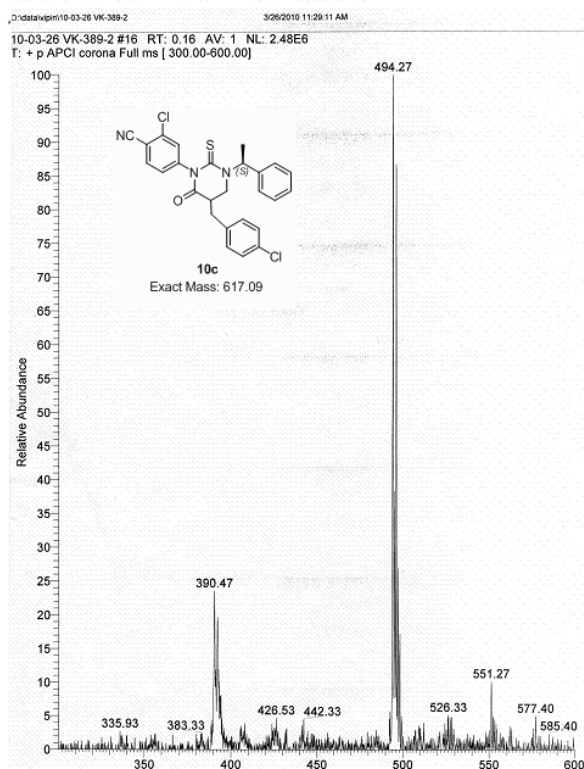



ORTEP diagram of compound **6a**

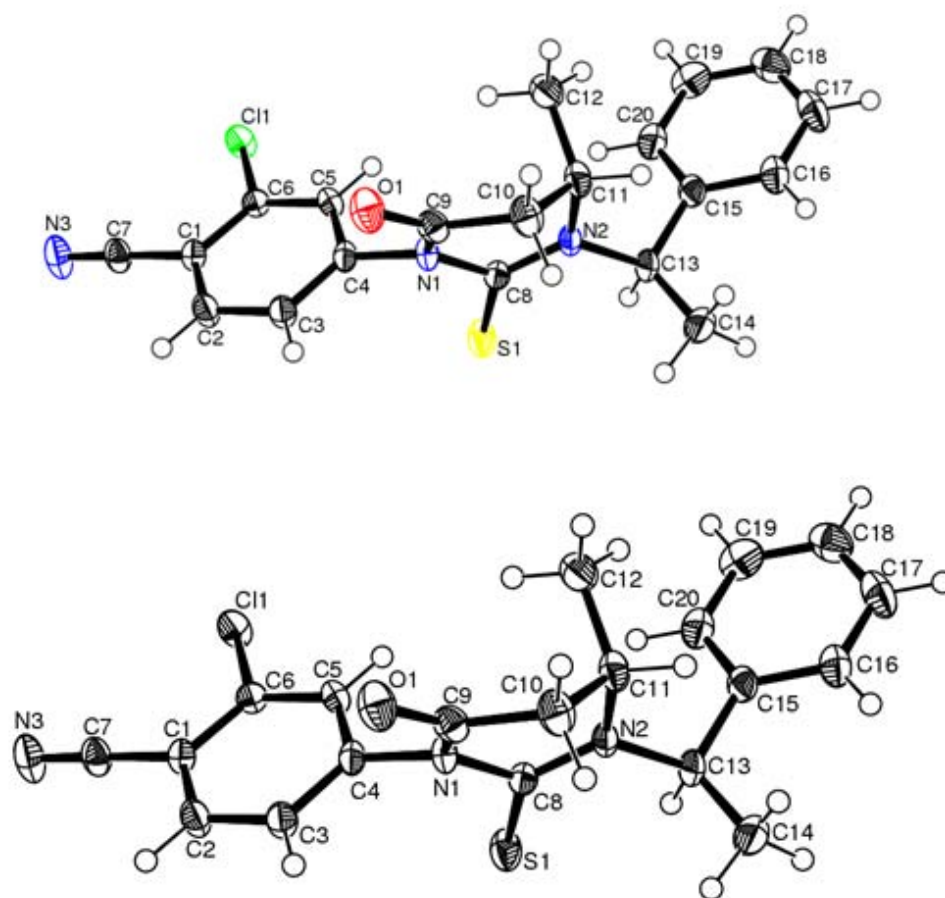

ORTEP diagram of compound **6d**

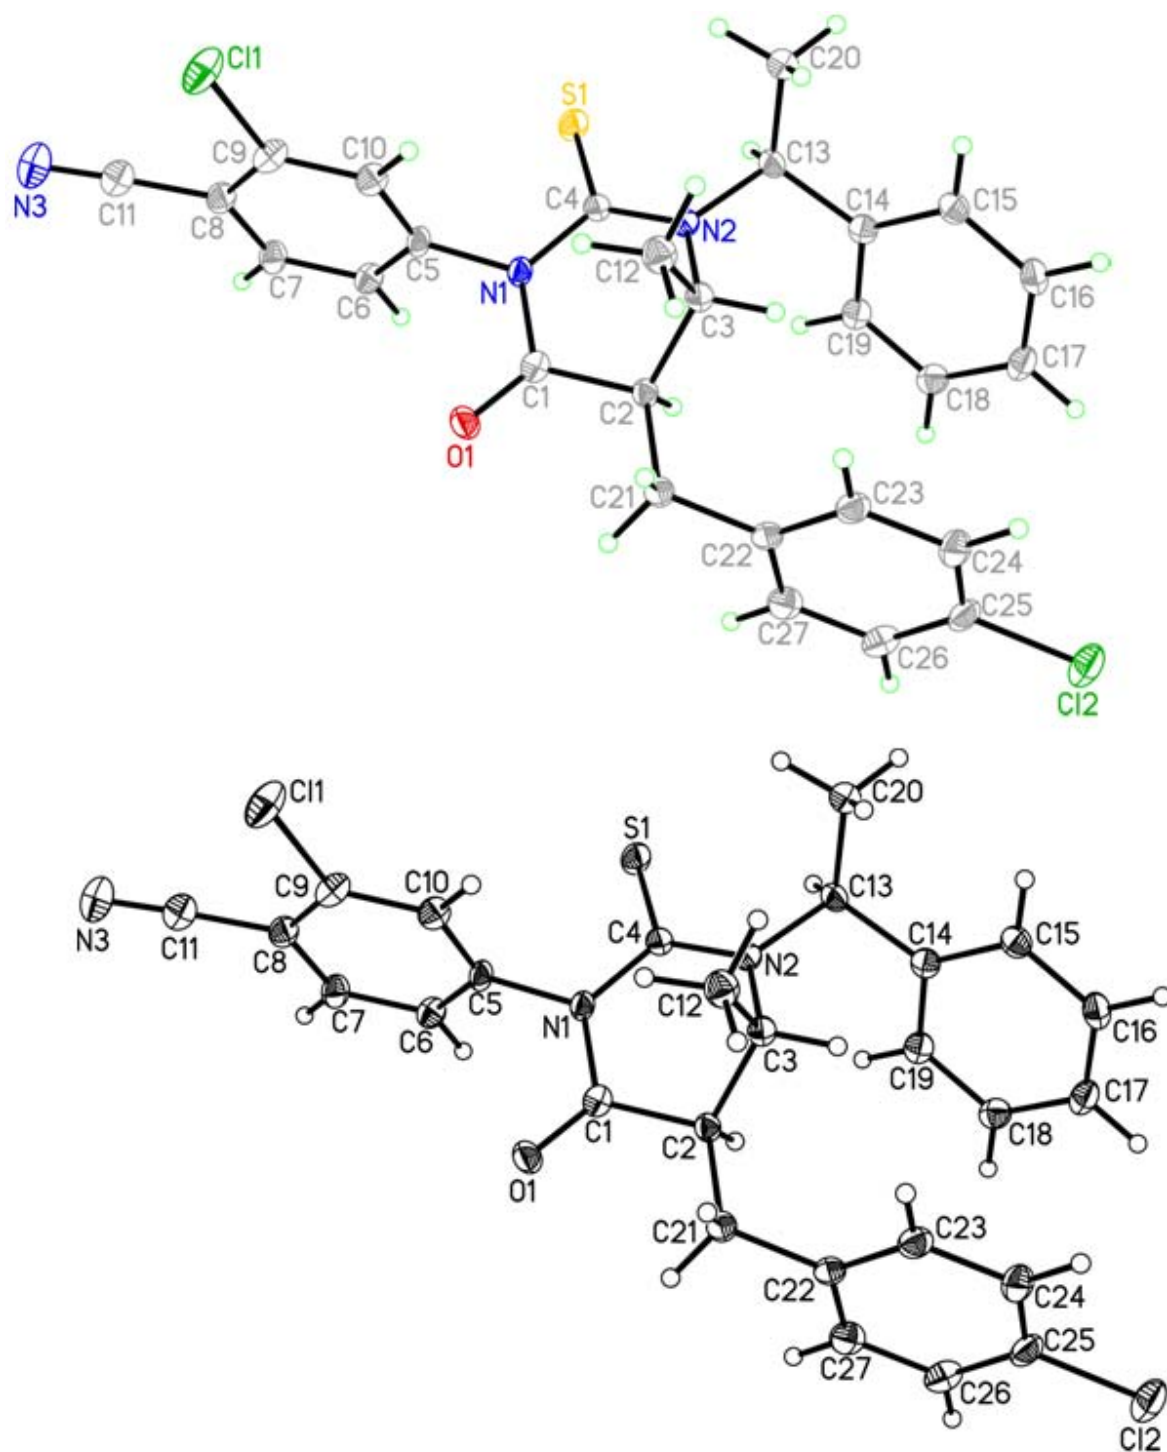

ORTEP diagram of compound **6ai**



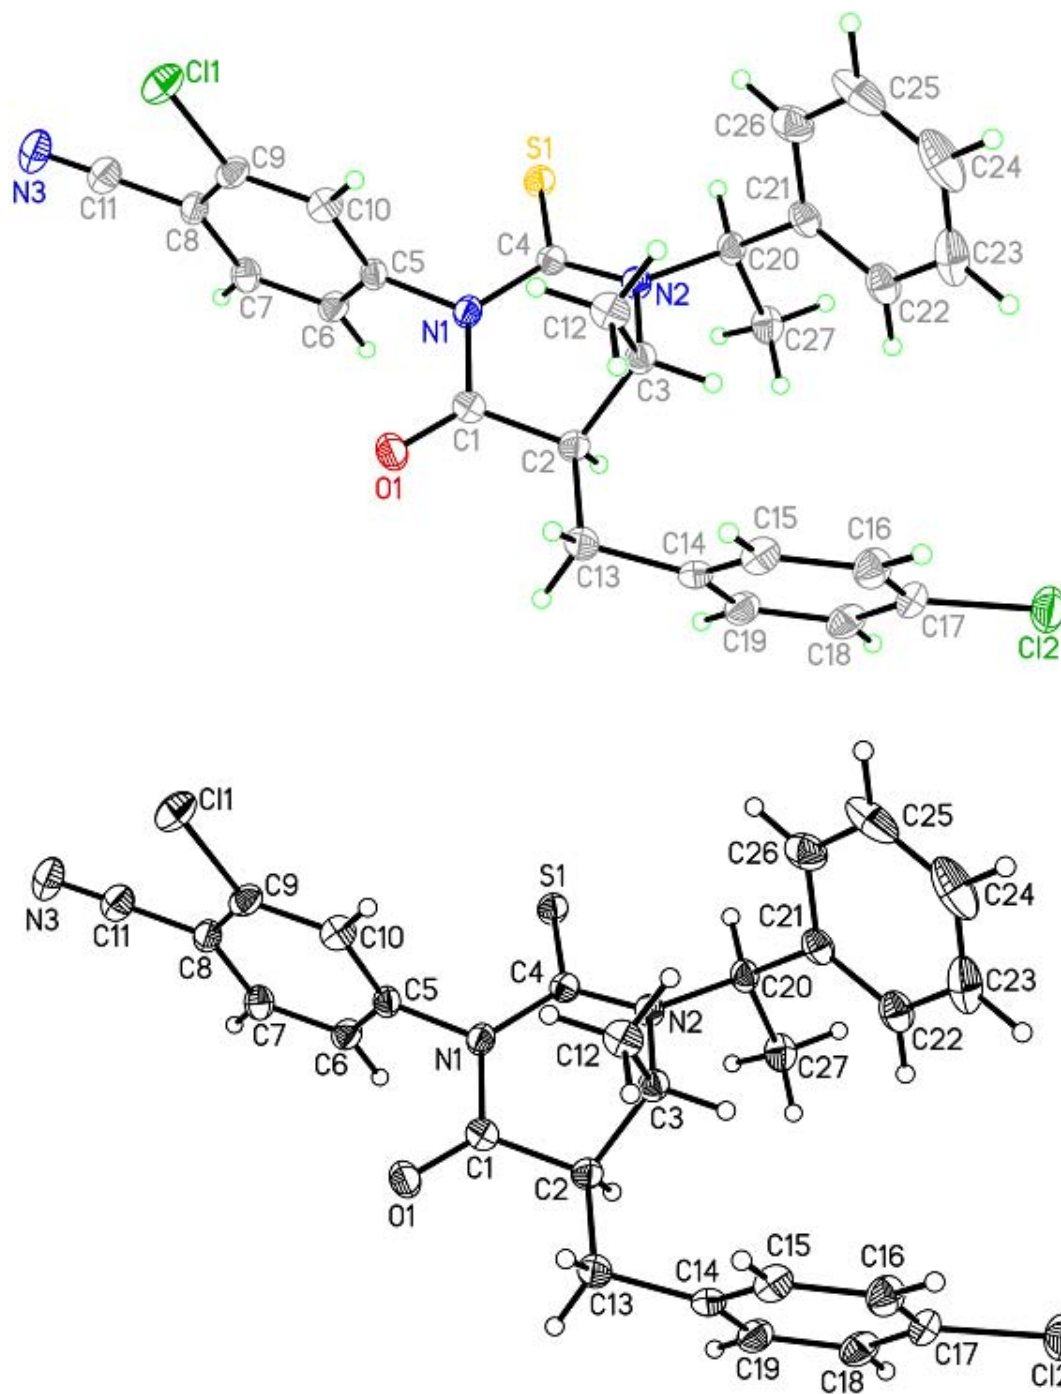

ORTEP diagram of compound **6di**

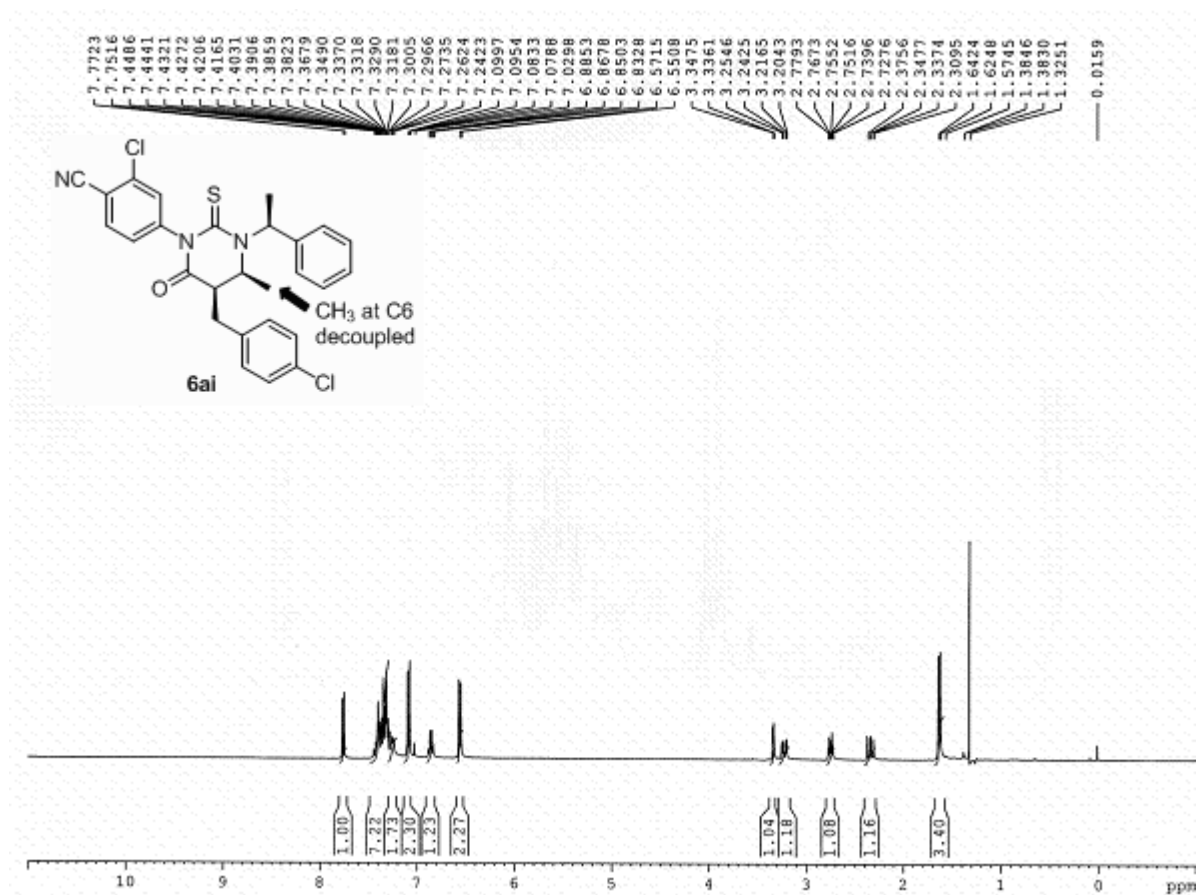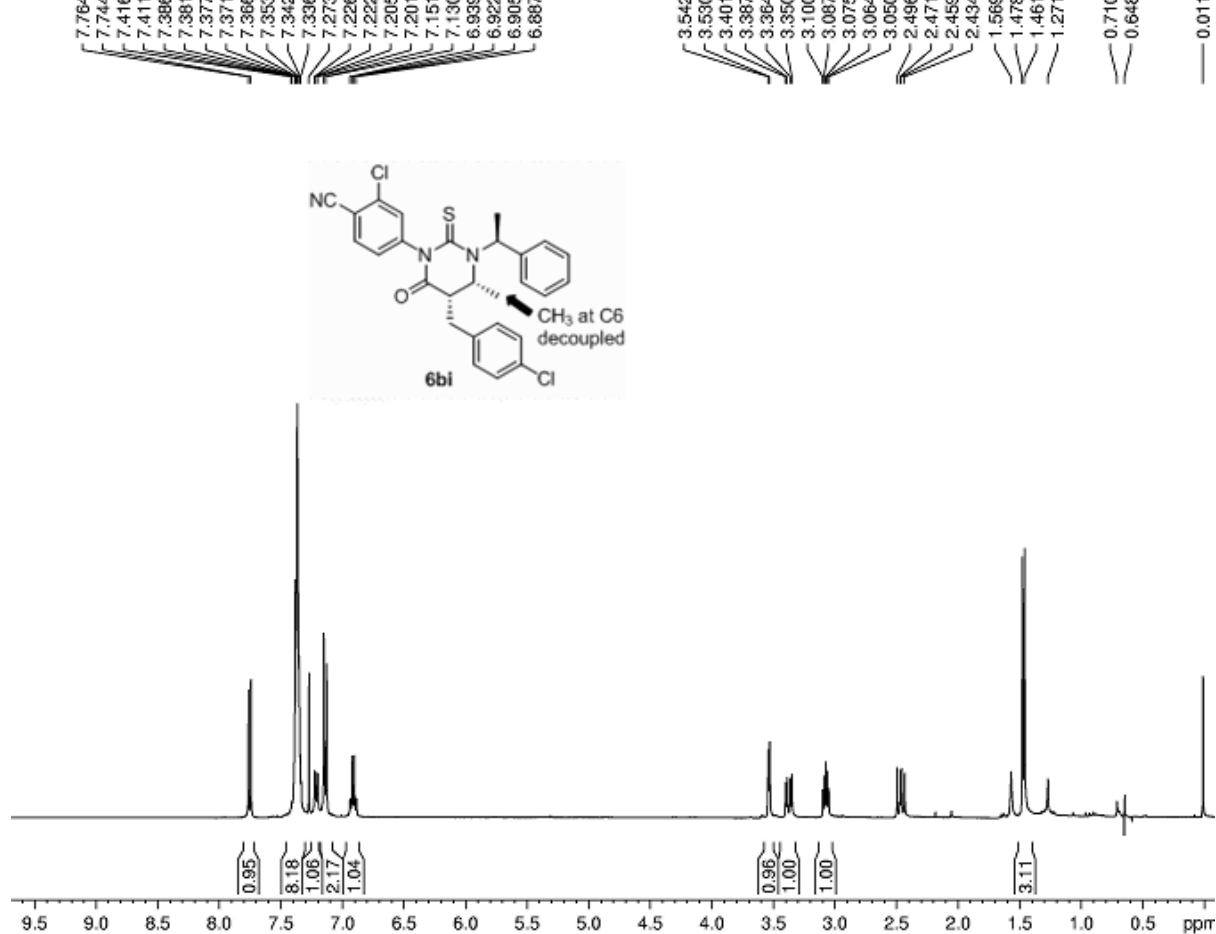

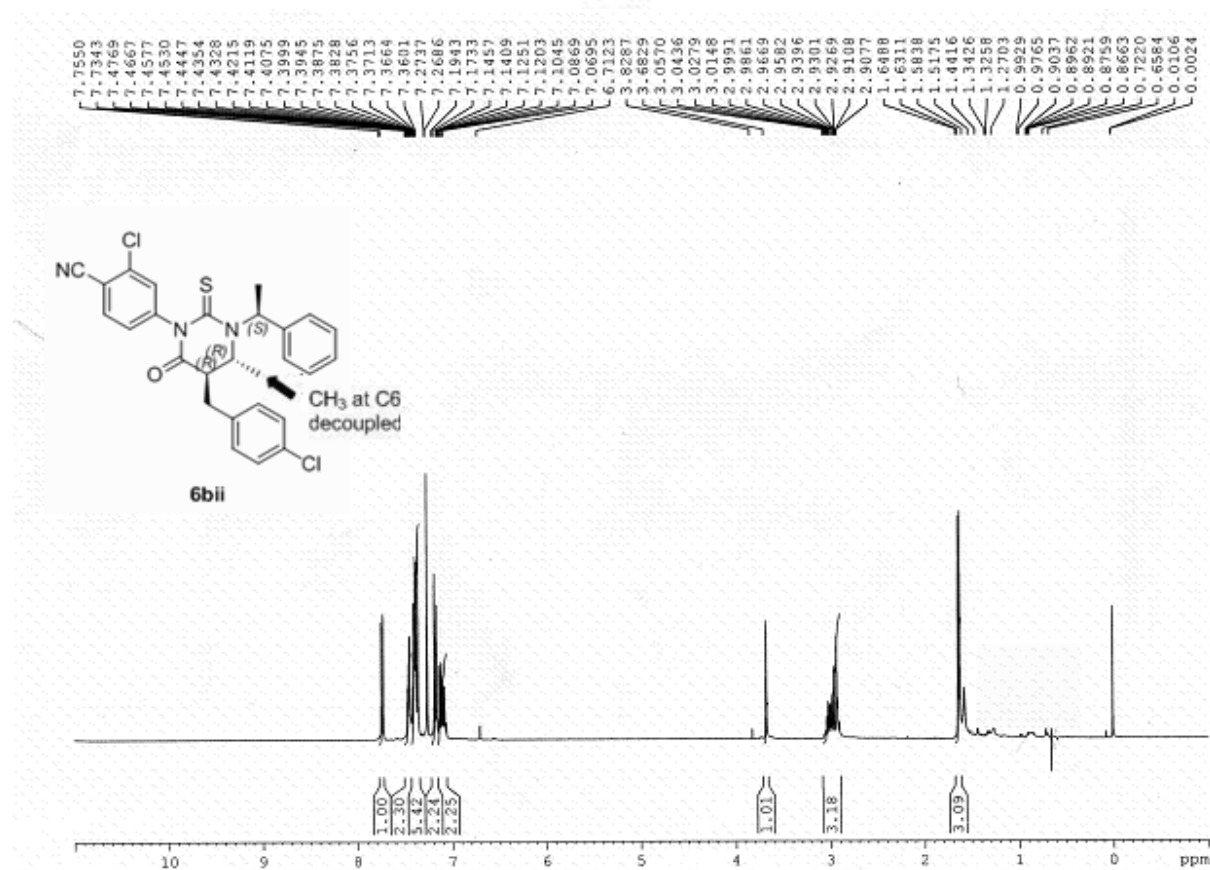

## Mass Spectrum List Report

### Analysis Info

Analysis Name D:\Data\vipin\10-05-18-VK-6A.d  
Method tune\_low.m  
Sample Name VK-6A  
Comment

Acquisition Date 5/18/2010 11:12:47 AM

Operator VIKAS GROVER  
Instrument / Ser# maXis 40

### Acquisition Parameter

|             |            |                       |           |                  |           |
|-------------|------------|-----------------------|-----------|------------------|-----------|
| Source Type | ESI        | Ion Polarity          | Positive  | Set Nebulizer    | 0.4 Bar   |
| Focus       | Not active | Set Capillary         | 4500 V    | Set Dry Heater   | 180 °C    |
| Scan Begin  | 50 m/z     | Set End Plate Offset  | -500 V    | Set Dry Gas      | 4.0 l/min |
| Scan End    | 600 m/z    | Set Collision Cell RF | 300.0 Vpp | Set Divert Valve | Source    |

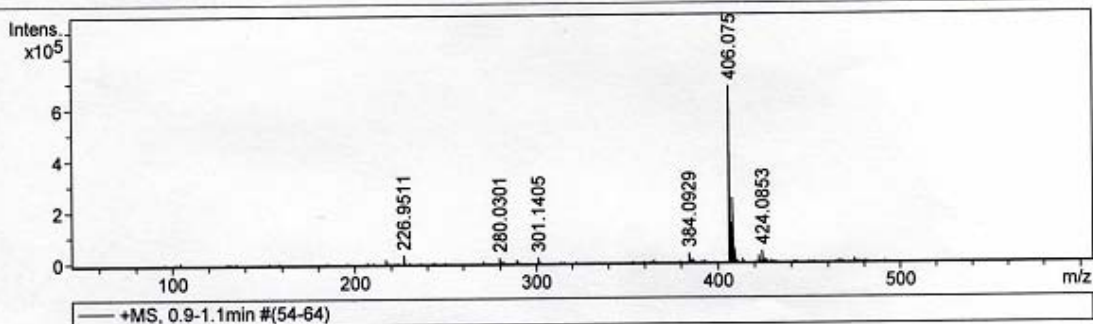

| #  | m/z      | Res.  | S/N     | I      | FWHM   |
|----|----------|-------|---------|--------|--------|
| 1  | 216.9221 | 24549 | 1830.2  | 13953  | 0.0088 |
| 2  | 226.9511 | 23652 | 4330.9  | 32076  | 0.0096 |
| 3  | 270.9769 | 26339 | 728.6   | 8057   | 0.0103 |
| 4  | 280.0301 | 24934 | 1611.5  | 20773  | 0.0112 |
| 5  | 289.1533 | 25799 | 692.1   | 9898   | 0.0112 |
| 6  | 301.1405 | 26219 | 1723.8  | 22378  | 0.0115 |
| 7  | 384.0929 | 25068 | 912.5   | 34735  | 0.0153 |
| 8  | 406.0757 | 22348 | 13085.1 | 679592 | 0.0182 |
| 9  | 407.0785 | 22022 | 2940.1  | 150213 | 0.0185 |
| 10 | 407.5373 | 20028 | 0.2     | 9      | 0.0203 |
| 11 | 408.0731 | 21015 | 4947.9  | 248640 | 0.0194 |
| 12 | 409.0752 | 24048 | 1034.8  | 51124  | 0.0170 |
| 13 | 424.0853 | 25477 | 1171.9  | 43064  | 0.0166 |

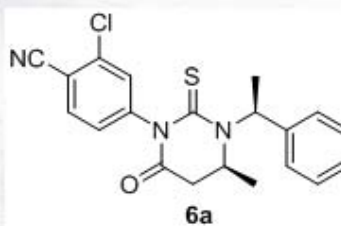

Exact Mass: 383.0859  
[M+Na]<sup>+</sup> = 406.0757

## Mass Spectrum List Report

### Analysis Info

Analysis Name D:\Data\vipin\10-05-18-VK-6B.d  
Method tune\_low.m  
Sample Name VK-6B  
Comment

Acquisition Date 5/18/2010 9:05:53 AM

Operator VIKAS GROVER  
Instrument / Ser# maXis 40

### Acquisition Parameter

|             |            |                       |           |                  |           |
|-------------|------------|-----------------------|-----------|------------------|-----------|
| Source Type | ESI        | Ion Polarity          | Positive  | Set Nebulizer    | 0.4 Bar   |
| Focus       | Not active | Set Capillary         | 4500 V    | Set Dry Heater   | 180 °C    |
| Scan Begin  | 50 m/z     | Set End Plate Offset  | -500 V    | Set Dry Gas      | 4.0 l/min |
| Scan End    | 600 m/z    | Set Collision Cell RF | 300.0 Vpp | Set Divert Valve | Source    |

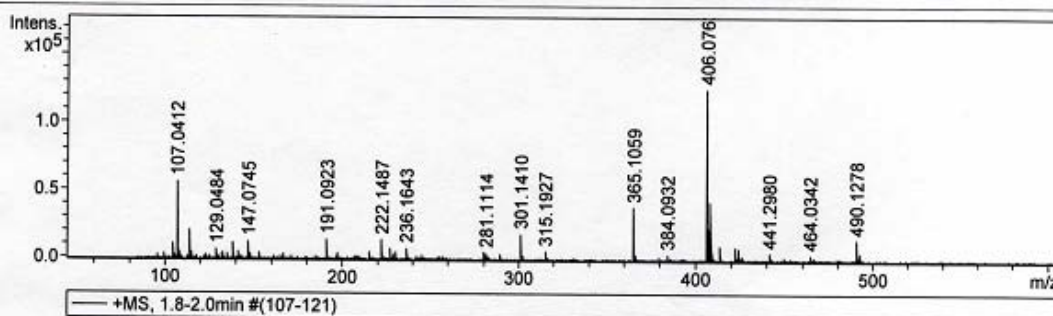

| #  | m/z      | Res.  | S/N    | I      | FWHM   |
|----|----------|-------|--------|--------|--------|
| 1  | 107.0412 | 16913 | 5452.3 | 56321  | 0.0063 |
| 2  | 114.0541 | 24261 | 1769.4 | 20615  | 0.0047 |
| 3  | 129.0484 | 19200 | 459.4  | 6651   | 0.0067 |
| 4  | 138.0644 | 12439 | 243.7  | 3943   | 0.0111 |
| 5  | 147.0745 | 19810 | 827.2  | 12469  | 0.0074 |
| 6  | 191.0923 | 21145 | 1053.5 | 14184  | 0.0090 |
| 7  | 222.1487 | 23998 | 871.4  | 14222  | 0.0093 |
| 8  | 227.0564 | 22703 | 470.0  | 7583   | 0.0100 |
| 9  | 236.1643 | 23738 | 518.8  | 8187   | 0.0099 |
| 10 | 281.1114 | 25303 | 299.1  | 4984   | 0.0111 |
| 11 | 289.1536 | 24827 | 221.9  | 3756   | 0.0116 |
| 12 | 301.1410 | 24587 | 1113.0 | 18375  | 0.0122 |
| 13 | 315.1927 | 24431 | 382.0  | 6121   | 0.0129 |
| 14 | 365.1059 | 24120 | 2216.9 | 38375  | 0.0151 |
| 15 | 384.0932 | 26103 | 189.4  | 4064   | 0.0147 |
| 16 | 406.0762 | 22830 | 5242.7 | 125386 | 0.0178 |
| 17 | 413.2665 | 26302 | 444.3  | 10118  | 0.0157 |
| 18 | 422.0496 | 26199 | 427.8  | 9142   | 0.0161 |
| 19 | 441.2980 | 27014 | 258.3  | 5085   | 0.0163 |
| 20 | 464.0342 | 26870 | 167.9  | 3981   | 0.0173 |
| 21 | 490.1278 | 24819 | 733.1  | 14933  | 0.0197 |

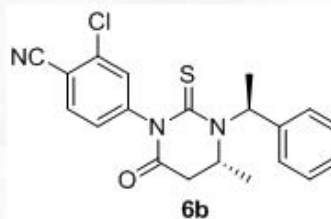

Exact Mass: 383.0859

$[M+Na]^+ = 406.0757$



## Mass Spectrum List Report

### Analysis Info

Analysis Name D:\Data\vipin\10-05-18-VK-6C.d  
Method tune\_low.m  
Sample Name VK-6C  
Comment

Acquisition Date 5/18/2010 9:12:31 AM

Operator VIKAS GROVER  
Instrument / Ser# maXis 40

### Acquisition Parameter

|             |            |                       |           |                  |           |
|-------------|------------|-----------------------|-----------|------------------|-----------|
| Source Type | ESI        | Ion Polarity          | Positive  | Set Nebulizer    | 0.4 Bar   |
| Focus       | Not active | Set Capillary         | 4500 V    | Set Dry Heater   | 180 °C    |
| Scan Begin  | 50 m/z     | Set End Plate Offset  | -500 V    | Set Dry Gas      | 4.0 l/min |
| Scan End    | 600 m/z    | Set Collision Cell RF | 300.0 Vpp | Set Divert Valve | Source    |

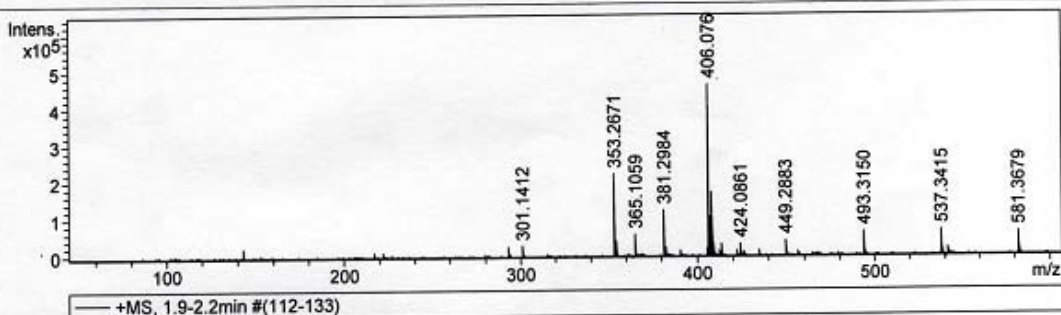

| #  | m/z      | Res.  | S/N    | I      | FWHM   |
|----|----------|-------|--------|--------|--------|
| 1  | 301.1412 | 25222 | 1721.1 | 28534  | 0.0119 |
| 2  | 353.2671 | 21332 | 8035.1 | 219458 | 0.0166 |
| 3  | 365.1059 | 23981 | 1662.4 | 57945  | 0.0152 |
| 4  | 381.2984 | 22623 | 2268.6 | 122849 | 0.0169 |
| 5  | 406.0766 | 22036 | 6780.4 | 460465 | 0.0184 |
| 6  | 407.0791 | 23017 | 1565.9 | 104244 | 0.0177 |
| 7  | 408.0738 | 21600 | 2592.2 | 169127 | 0.0189 |
| 8  | 424.0861 | 25886 | 746.2  | 32726  | 0.0164 |
| 9  | 434.2567 | 27256 | 436.5  | 13216  | 0.0159 |
| 10 | 449.2883 | 24885 | 1637.2 | 41502  | 0.0181 |
| 11 | 493.3150 | 24964 | 3193.3 | 63447  | 0.0198 |
| 12 | 537.3415 | 24270 | 3458.3 | 66391  | 0.0221 |
| 13 | 581.3679 | 25384 | 3856.7 | 60525  | 0.0229 |

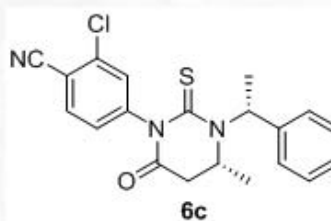

Exact Mass: 383.0859  
[M+Na]<sup>+</sup> = 406.0757

## Mass Spectrum List Report

### Analysis Info

Analysis Name D:\Data\vipin\10-05-18-VK-6D.d  
Method tune\_low.m  
Sample Name VK-6D  
Comment

Acquisition Date 5/18/2010 9:19:17 AM

Operator VIKAS GROVER  
Instrument / Ser# maXis 40

### Acquisition Parameter

|             |            |                       |           |                  |           |
|-------------|------------|-----------------------|-----------|------------------|-----------|
| Source Type | ESI        | Ion Polarity          | Positive  | Set Nebulizer    | 0.4 Bar   |
| Focus       | Not active | Set Capillary         | 4500 V    | Set Dry Heater   | 180 °C    |
| Scan Begin  | 50 m/z     | Set End Plate Offset  | -500 V    | Set Dry Gas      | 4.0 l/min |
| Scan End    | 600 m/z    | Set Collision Cell RF | 300.0 Vpp | Set Divert Valve | Source    |

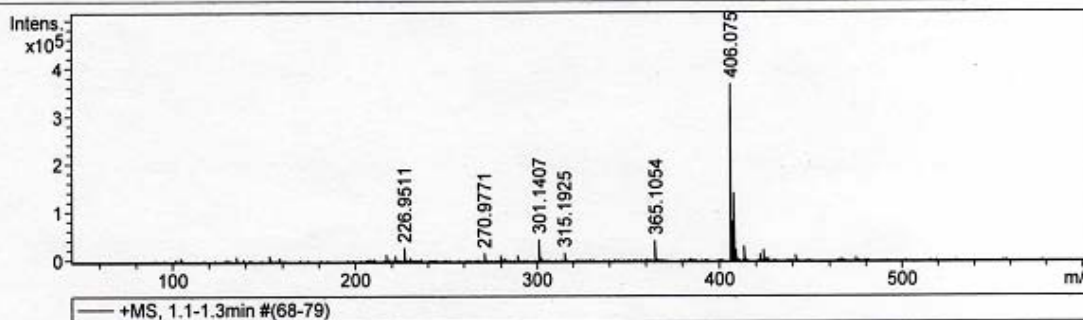

| #  | m/z      | Res.  | S/N    | I      | FWHM   |
|----|----------|-------|--------|--------|--------|
| 1  | 216.9221 | 23575 | 1058.4 | 14406  | 0.0092 |
| 2  | 222.1482 | 24114 | 764.1  | 10312  | 0.0092 |
| 3  | 226.9511 | 23111 | 2019.7 | 27040  | 0.0098 |
| 4  | 270.9771 | 24866 | 779.0  | 14509  | 0.0109 |
| 5  | 280.0300 | 24253 | 542.2  | 11474  | 0.0115 |
| 6  | 289.1533 | 25200 | 426.9  | 9886   | 0.0115 |
| 7  | 301.1407 | 23263 | 2058.3 | 44379  | 0.0129 |
| 8  | 315.1925 | 25593 | 797.0  | 15695  | 0.0123 |
| 9  | 365.1054 | 25035 | 1634.3 | 40958  | 0.0146 |
| 10 | 406.0759 | 21406 | 8650.4 | 364845 | 0.0190 |
| 11 | 407.0786 | 23370 | 1967.2 | 81763  | 0.0174 |
| 12 | 408.0733 | 21749 | 3404.0 | 139404 | 0.0188 |
| 13 | 409.0752 | 24177 | 584.8  | 23589  | 0.0169 |
| 14 | 413.2662 | 25509 | 775.2  | 29280  | 0.0162 |
| 15 | 424.0854 | 26135 | 756.0  | 23553  | 0.0162 |

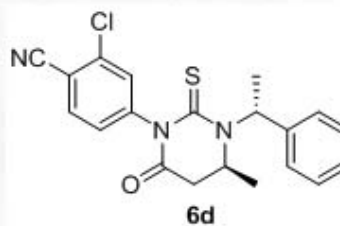

Exact Mass: 383.0859  
[M+Na]<sup>+</sup> = 406.0757

## Mass Spectrum List Report

### Analysis Info

Analysis Name D:\Data\vipin\10-05-18-VK-7A.d  
Method tune\_low.m  
Sample Name VK-7A  
Comment

Acquisition Date 5/18/2010 9:28:38 AM

Operator VIKAS GROVER  
Instrument / Ser# maXis 40

### Acquisition Parameter

|             |            |                       |           |                  |           |
|-------------|------------|-----------------------|-----------|------------------|-----------|
| Source Type | ESI        | Ion Polarity          | Positive  | Set Nebulizer    | 0.4 Bar   |
| Focus       | Not active | Set Capillary         | 4500 V    | Set Dry Heater   | 180 °C    |
| Scan Begin  | 50 m/z     | Set End Plate Offset  | -500 V    | Set Dry Gas      | 4.0 l/min |
| Scan End    | 600 m/z    | Set Collision Cell RF | 300.0 Vpp | Set Divert Valve | Source    |

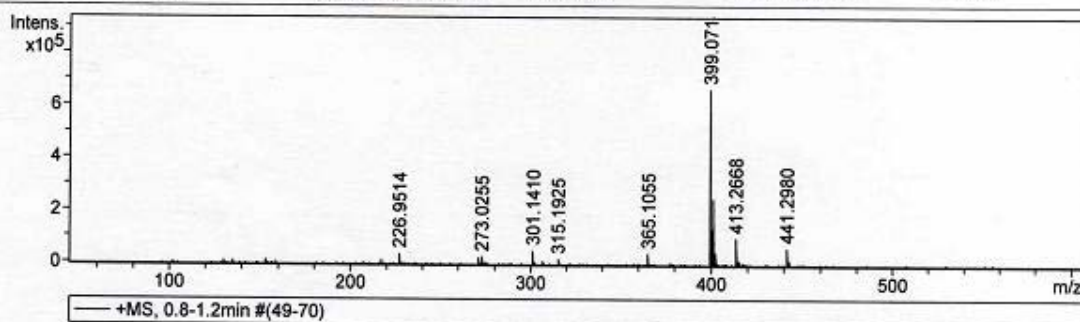

| #  | m/z      | Res.  | S/N    | I      | FWHM   |
|----|----------|-------|--------|--------|--------|
| 1  | 216.9224 | 24162 | 997.9  | 14650  | 0.0090 |
| 2  | 226.9514 | 21619 | 2589.2 | 38926  | 0.0105 |
| 3  | 273.0255 | 23866 | 944.4  | 26389  | 0.0114 |
| 4  | 301.1410 | 23823 | 1527.6 | 50307  | 0.0126 |
| 5  | 306.2786 | 25800 | 322.1  | 10247  | 0.0119 |
| 6  | 315.1925 | 25230 | 602.3  | 17992  | 0.0125 |
| 7  | 365.1055 | 24714 | 1189.5 | 40844  | 0.0148 |
| 8  | 399.0714 | 22088 | 8970.9 | 663240 | 0.0181 |
| 9  | 400.0741 | 21798 | 1828.3 | 136265 | 0.0184 |
| 10 | 401.0687 | 21351 | 3405.0 | 249804 | 0.0188 |
| 11 | 402.0708 | 24055 | 646.5  | 46671  | 0.0167 |
| 12 | 413.2668 | 23115 | 1680.9 | 99251  | 0.0179 |
| 13 | 441.2980 | 23977 | 2093.6 | 62927  | 0.0184 |

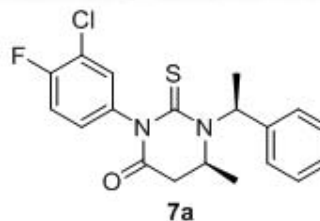

Exact Mass: 376.0812

$[M+Na]^+ = 399.0710$



## Mass Spectrum List Report

### Analysis Info

Analysis Name D:\Data\vipin\10-05-18-VK-7B.d  
Method tune\_low.m  
Sample Name VK-7B  
Comment

Acquisition Date 5/18/2010 9:34:30 AM

Operator VIKAS GROVER  
Instrument / Ser# maXis 40

### Acquisition Parameter

|             |            |                       |           |                  |           |
|-------------|------------|-----------------------|-----------|------------------|-----------|
| Source Type | ESI        | Ion Polarity          | Positive  | Set Nebulizer    | 0.4 Bar   |
| Focus       | Not active | Set Capillary         | 4500 V    | Set Dry Heater   | 180 °C    |
| Scan Begin  | 50 m/z     | Set End Plate Offset  | -500 V    | Set Dry Gas      | 4.0 l/min |
| Scan End    | 600 m/z    | Set Collision Cell RF | 300.0 Vpp | Set Divert Valve | Source    |

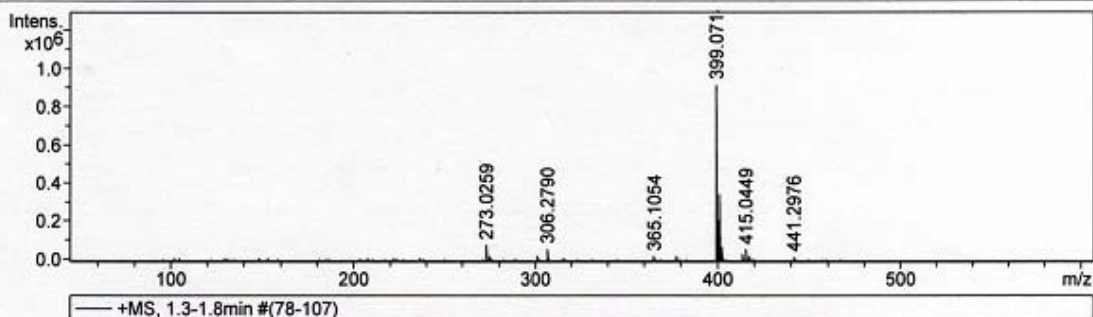

| #  | m/z      | Res.  | S/N     | I      | FWHM   |
|----|----------|-------|---------|--------|--------|
| 1  | 273.0259 | 22239 | 4195.1  | 78721  | 0.0123 |
| 2  | 301.1407 | 23603 | 1149.3  | 24631  | 0.0128 |
| 3  | 306.2790 | 22919 | 2758.6  | 57310  | 0.0134 |
| 4  | 365.1054 | 25552 | 878.9   | 21797  | 0.0143 |
| 5  | 377.0884 | 25870 | 475.7   | 19750  | 0.0146 |
| 6  | 399.0714 | 21187 | 12628.1 | 911532 | 0.0188 |
| 7  | 400.0743 | 22057 | 2881.8  | 210006 | 0.0181 |
| 8  | 401.0688 | 20366 | 4844.8  | 345916 | 0.0197 |
| 9  | 402.0711 | 23180 | 1024.9  | 71651  | 0.0173 |
| 10 | 415.0449 | 24707 | 1116.5  | 56582  | 0.0168 |
| 11 | 441.2976 | 25595 | 955.9   | 16642  | 0.0172 |

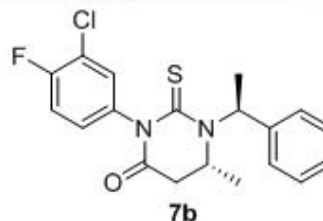

Exact Mass: 376.0812

$[M+Na]^+ = 399.0710$

## Mass Spectrum List Report

### Analysis Info

Analysis Name D:\Data\vipin\10-05-18-VK-8A.d  
Method tune\_low.m  
Sample Name VK-8A  
Comment

Acquisition Date 5/18/2010 11:20:28 AM

Operator VIKAS GROVER  
Instrument / Ser# maXis 40

### Acquisition Parameter

|             |            |                       |           |                  |           |
|-------------|------------|-----------------------|-----------|------------------|-----------|
| Source Type | ESI        | Ion Polarity          | Positive  | Set Nebulizer    | 0.4 Bar   |
| Focus       | Not active | Set Capillary         | 4500 V    | Set Dry Heater   | 180 °C    |
| Scan Begin  | 50 m/z     | Set End Plate Offset  | -500 V    | Set Dry Gas      | 4.0 l/min |
| Scan End    | 600 m/z    | Set Collision Cell RF | 300.0 Vpp | Set Divert Valve | Source    |

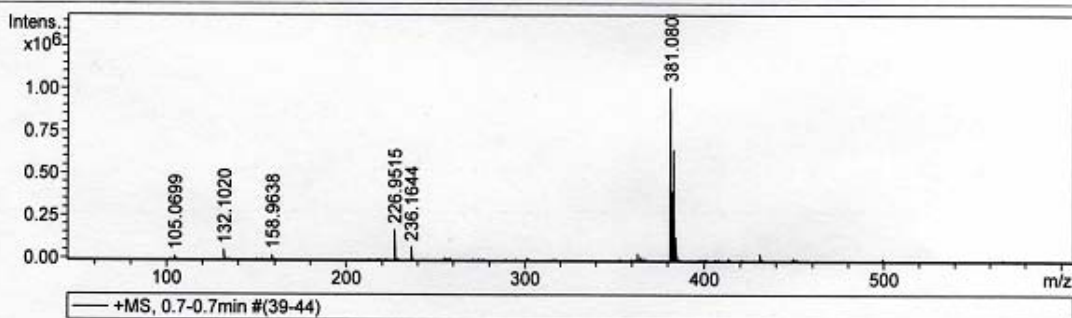

| # | m/z      | Res.  | S/N     | I       | FWHM   |
|---|----------|-------|---------|---------|--------|
| 1 | 105.0699 | 22485 | 14985.7 | 17886   | 0.0047 |
| 2 | 132.1020 | 21091 | 19221.6 | 53716   | 0.0063 |
| 3 | 158.9638 | 20022 | 7052.5  | 24794   | 0.0079 |
| 4 | 226.9515 | 21127 | 17351.7 | 174327  | 0.0107 |
| 5 | 236.1644 | 21732 | 7108.3  | 76277   | 0.0109 |
| 6 | 381.0808 | 15636 | 22423.0 | 1011544 | 0.0244 |
| 7 | 382.0833 | 21791 | 8751.8  | 400401  | 0.0175 |
| 8 | 383.0776 | 20273 | 13848.9 | 642375  | 0.0189 |
| 9 | 384.0802 | 21153 | 2917.8  | 137207  | 0.0182 |

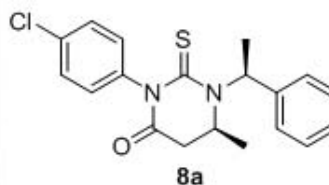

Exact Mass: 358.0907

$[M+Na]^+ = 381.0805$

## Mass Spectrum List Report

### Analysis Info

Analysis Name D:\Data\vipin\10-05-18-VK-8B.d  
Method tune\_low.m  
Sample Name VK-8B  
Comment

Acquisition Date 5/18/2010 11:44:01 AM

Operator VIKAS GROVER  
Instrument / Ser# maXis 40

### Acquisition Parameter

|             |            |                       |           |                  |           |
|-------------|------------|-----------------------|-----------|------------------|-----------|
| Source Type | ESI        | Ion Polarity          | Positive  | Set Nebulizer    | 0.4 Bar   |
| Focus       | Not active | Set Capillary         | 4500 V    | Set Dry Heater   | 180 °C    |
| Scan Begin  | 50 m/z     | Set End Plate Offset  | -500 V    | Set Dry Gas      | 4.0 l/min |
| Scan End    | 600 m/z    | Set Collision Cell RF | 300.0 Vpp | Set Divert Valve | Source    |

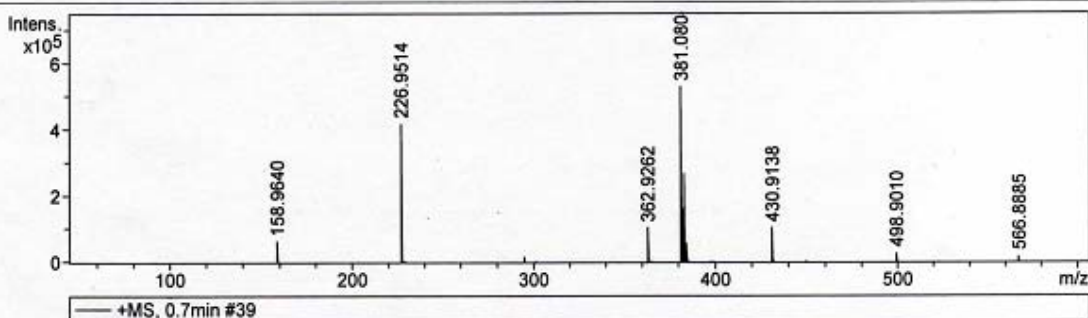

| #  | m/z      | Res.  | S/N    | I      | FWHM   |
|----|----------|-------|--------|--------|--------|
| 1  | 158.9640 | 20911 | 2484.3 | 63564  | 0.0076 |
| 2  | 226.9514 | 19886 | 6959.9 | 417687 | 0.0114 |
| 3  | 362.9262 | 23217 | 1316.3 | 104131 | 0.0156 |
| 4  | 381.0804 | 17470 | 2672.7 | 527155 | 0.0218 |
| 5  | 382.0830 | 21910 | 797.3  | 162450 | 0.0174 |
| 6  | 383.0775 | 20655 | 1281.1 | 269326 | 0.0185 |
| 7  | 384.0800 | 22107 | 261.5  | 56670  | 0.0174 |
| 8  | 385.0762 | 18526 | 47.3   | 10549  | 0.0208 |
| 9  | 430.9138 | 23202 | 954.8  | 105667 | 0.0186 |
| 10 | 498.9010 | 26446 | 1100.1 | 28711  | 0.0189 |
| 11 | 566.8885 | 25833 | 803.1  | 17893  | 0.0219 |

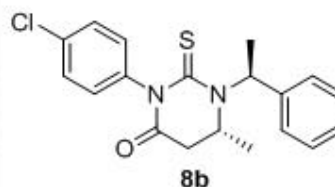

Exact Mass: 358.0907

$[M+Na]^+ = 381.0805$

## Mass Spectrum List Report

### Analysis Info

Analysis Name D:\Data\vipin\10-05-19-VK-9a.d  
Method tune\_low.m  
Sample Name vk-9a  
Comment

Acquisition Date 5/19/2010 12:31:51 PM

Operator VIKAS GROVER  
Instrument / Ser# maXis 40

### Acquisition Parameter

|             |            |                       |           |                  |           |
|-------------|------------|-----------------------|-----------|------------------|-----------|
| Source Type | ESI        | Ion Polarity          | Positive  | Set Nebulizer    | 0.4 Bar   |
| Focus       | Not active | Set Capillary         | 4500 V    | Set Dry Heater   | 180 °C    |
| Scan Begin  | 50 m/z     | Set End Plate Offset  | -500 V    | Set Dry Gas      | 4.0 l/min |
| Scan End    | 600 m/z    | Set Collision Cell RF | 300.0 Vpp | Set Divert Valve | Source    |

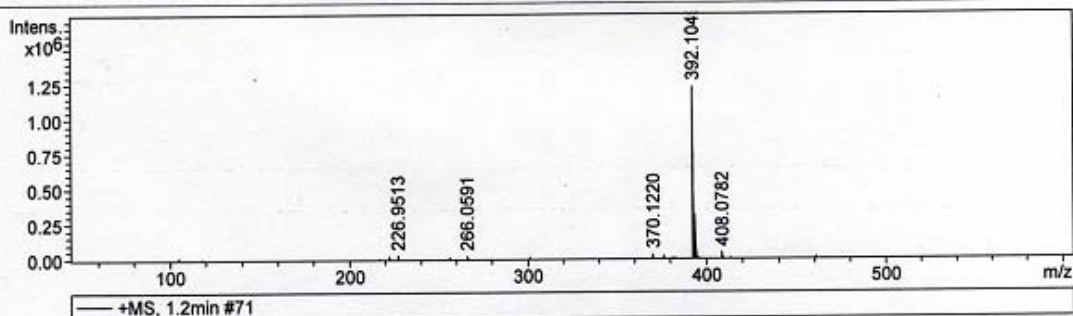

| #  | m/z      | Res.  | S/N    | I       | FWHM   |
|----|----------|-------|--------|---------|--------|
| 1  | 222.1486 | 26078 | 119.4  | 26176   | 0.0085 |
| 2  | 226.9513 | 23528 | 148.6  | 31578   | 0.0096 |
| 3  | 256.1304 | 25072 | 106.8  | 18635   | 0.0102 |
| 4  | 266.0591 | 25419 | 178.4  | 29446   | 0.0105 |
| 5  | 301.1407 | 26525 | 143.1  | 17017   | 0.0114 |
| 6  | 370.1220 | 25635 | 145.8  | 37371   | 0.0144 |
| 7  | 376.1270 | 26288 | 79.3   | 24815   | 0.0143 |
| 8  | 392.1049 | 19133 | 2655.2 | 1228859 | 0.0205 |
| 9  | 393.1077 | 21480 | 679.4  | 320817  | 0.0183 |
| 10 | 394.1042 | 18477 | 175.6  | 84559   | 0.0213 |
| 11 | 408.0782 | 24894 | 111.6  | 48412   | 0.0164 |

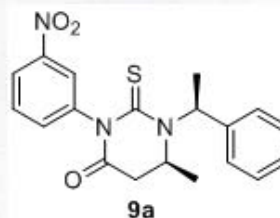

Exact Mass: 369.1147

$[M+Na]^+ = 392.1045$



## Mass Spectrum List Report

### Analysis Info

Analysis Name D:\Data\vipin\10-05-18-VK-9B.d  
Method tune\_low.m  
Sample Name VK-9B  
Comment

Acquisition Date 5/18/2010 12:35:25 PM

Operator VIKAS GROVER  
Instrument / Ser# maXis 40

### Acquisition Parameter

|             |            |                       |           |                  |           |
|-------------|------------|-----------------------|-----------|------------------|-----------|
| Source Type | ESI        | Ion Polarity          | Positive  | Set Nebulizer    | 0.4 Bar   |
| Focus       | Not active | Set Capillary         | 4500 V    | Set Dry Heater   | 180 °C    |
| Scan Begin  | 50 m/z     | Set End Plate Offset  | -500 V    | Set Dry Gas      | 4.0 l/min |
| Scan End    | 600 m/z    | Set Collision Cell RF | 300.0 Vpp | Set Divert Valve | Source    |

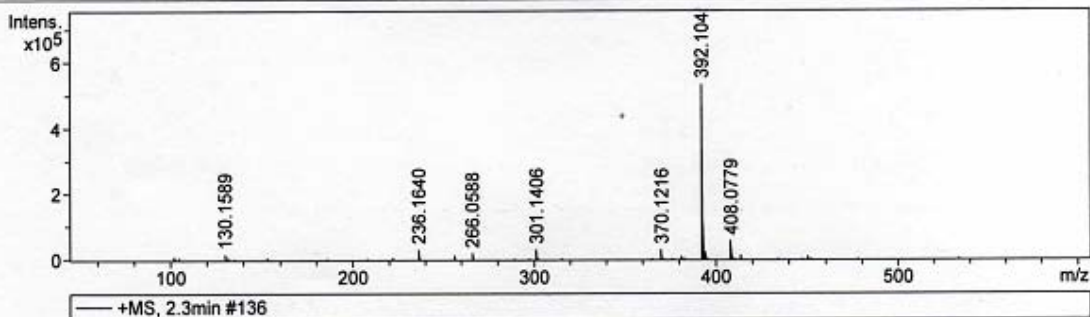

| # | m/z      | Res.  | S/N     | I      | FWHM   |
|---|----------|-------|---------|--------|--------|
| 1 | 130.1589 | 23574 | 2082.5  | 17959  | 0.0055 |
| 2 | 236.1640 | 25121 | 1654.4  | 32158  | 0.0094 |
| 3 | 256.1300 | 25340 | 712.1   | 16035  | 0.0101 |
| 4 | 266.0588 | 25523 | 954.1   | 21368  | 0.0104 |
| 5 | 301.1406 | 24515 | 1473.1  | 31942  | 0.0123 |
| 6 | 370.1216 | 25398 | 898.1   | 30007  | 0.0146 |
| 7 | 392.1045 | 22323 | 10163.7 | 532185 | 0.0176 |
| 8 | 408.0779 | 24355 | 1137.9  | 58296  | 0.0168 |

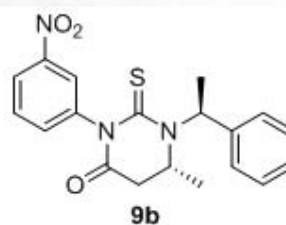

Exact Mass: 369.1147

$[M+Na]^+ = 392.1045$

## Mass Spectrum List Report

### Analysis Info

Analysis Name D:\Data\vipin\10-05-18-VK-10.d  
Method tune\_low.m  
Sample Name VK-10  
Comment

Acquisition Date 5/18/2010 1:35:54 PM

Operator VIKAS GROVER  
Instrument / Ser# maXis 40

### Acquisition Parameter

|             |            |                       |           |                  |           |
|-------------|------------|-----------------------|-----------|------------------|-----------|
| Source Type | ESI        | Ion Polarity          | Positive  | Set Nebulizer    | 0.4 Bar   |
| Focus       | Not active | Set Capillary         | 4500 V    | Set Dry Heater   | 180 °C    |
| Scan Begin  | 50 m/z     | Set End Plate Offset  | -500 V    | Set Dry Gas      | 4.0 l/min |
| Scan End    | 600 m/z    | Set Collision Cell RF | 300.0 Vpp | Set Divert Valve | Source    |

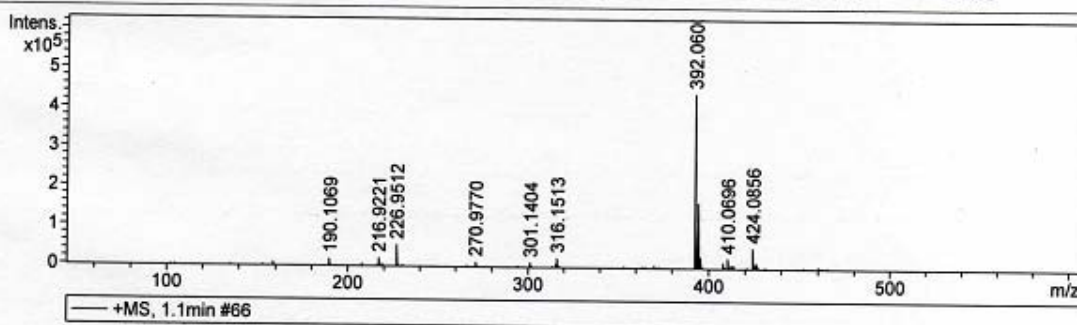

| #  | m/z      | Res.  | S/N    | I      | FWHM   |
|----|----------|-------|--------|--------|--------|
| 1  | 190.1069 | 21558 | 2686.4 | 18663  | 0.0088 |
| 2  | 216.9221 | 25943 | 2145.4 | 21612  | 0.0084 |
| 3  | 226.9512 | 21601 | 5648.2 | 54440  | 0.0105 |
| 4  | 270.9770 | 26859 | 1159.7 | 13468  | 0.0102 |
| 5  | 301.1404 | 25256 | 798.8  | 11855  | 0.0119 |
| 6  | 316.1513 | 25675 | 1572.0 | 24721  | 0.0123 |
| 7  | 392.0600 | 22371 | 9356.1 | 441772 | 0.0175 |
| 8  | 393.0626 | 23284 | 1978.9 | 95433  | 0.0169 |
| 9  | 394.0573 | 22062 | 3383.5 | 166556 | 0.0179 |
| 10 | 395.0593 | 25095 | 562.5  | 28254  | 0.0157 |
| 11 | 410.0696 | 27161 | 547.5  | 25956  | 0.0151 |
| 12 | 424.0856 | 25611 | 189.3  | 52682  | 0.0166 |

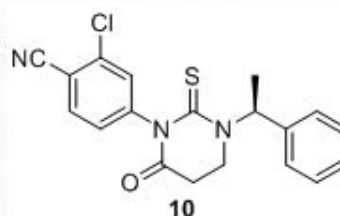

Exact Mass: 369.0703

[M+Na]<sup>+</sup> = 392.0601

## Mass Spectrum List Report

### Analysis Info

Analysis Name D:\Data\vipin\10-05-18-VK-10A.d  
Method tune\_low.m  
Sample Name VK-10A  
Comment

Acquisition Date 5/18/2010 1:45:55 PM

Operator VIKAS GROVER  
Instrument / Ser# maXis 40

### Acquisition Parameter

|             |            |                       |           |                  |           |
|-------------|------------|-----------------------|-----------|------------------|-----------|
| Source Type | ESI        | Ion Polarity          | Positive  | Set Nebulizer    | 0.4 Bar   |
| Focus       | Not active | Set Capillary         | 4500 V    | Set Dry Heater   | 180 °C    |
| Scan Begin  | 50 m/z     | Set End Plate Offset  | -500 V    | Set Dry Gas      | 4.0 l/min |
| Scan End    | 800 m/z    | Set Collision Cell RF | 300.0 Vpp | Set Divert Valve | Source    |

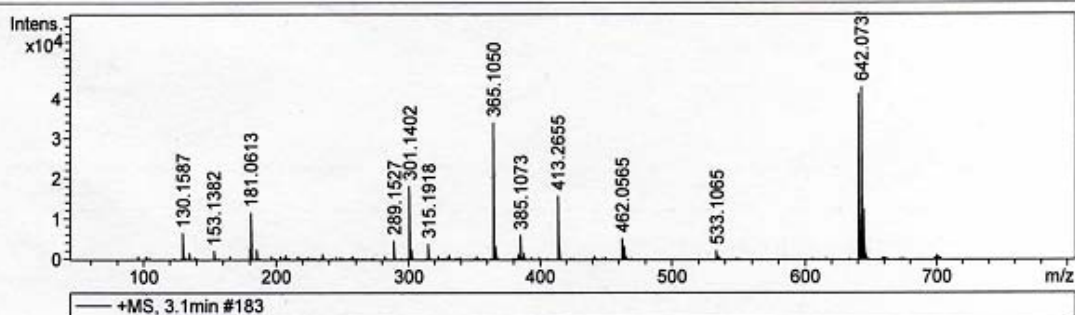

| #  | m/z      | Res.  | S/N   | I     | FWHM   |
|----|----------|-------|-------|-------|--------|
| 1  | 130.1587 | 20234 | 90.2  | 6628  | 0.0064 |
| 2  | 153.1382 | 20883 | 27.2  | 2231  | 0.0073 |
| 3  | 181.0613 | 22741 | 138.1 | 11688 | 0.0080 |
| 4  | 289.1527 | 27025 | 63.2  | 4754  | 0.0107 |
| 5  | 301.1402 | 24593 | 216.8 | 18337 | 0.0122 |
| 6  | 315.1918 | 24455 | 41.5  | 3968  | 0.0129 |
| 7  | 365.1050 | 26120 | 286.9 | 33968 | 0.0140 |
| 8  | 385.1073 | 25972 | 54.7  | 6034  | 0.0148 |
| 9  | 399.0692 | 32334 | 5.3   | 505   | 0.0123 |
| 10 | 413.2655 | 26137 | 196.6 | 15757 | 0.0158 |
| 11 | 414.2687 | 28864 | 47.0  | 3720  | 0.0144 |
| 12 | 462.0565 | 28766 | 99.0  | 5371  | 0.0161 |
| 13 | 533.1065 | 27726 | 77.5  | 2352  | 0.0192 |
| 14 | 640.0760 | 26728 | 900.6 | 40918 | 0.0239 |
| 15 | 641.0786 | 26070 | 251.4 | 11311 | 0.0246 |
| 16 | 642.0735 | 25873 | 960.6 | 42789 | 0.0248 |
| 17 | 643.0755 | 26208 | 260.0 | 11467 | 0.0245 |
| 18 | 644.0708 | 24884 | 286.5 | 12507 | 0.0259 |
| 19 | 645.0725 | 26072 | 72.8  | 3145  | 0.0247 |
| 20 | 646.0690 | 24610 | 34.1  | 1459  | 0.0263 |
| 21 | 647.0683 | 25671 | 9.1   | 384   | 0.0252 |

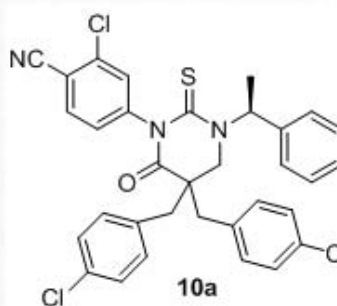

Exact Mass: 617.0862  
[M+Na]<sup>+</sup> = 640.0760

## Mass Spectrum List Report

### Analysis Info

Analysis Name D:\Data\vipin\10-05-18-VK-10B.d  
Method tune\_low.m  
Sample Name VK-10B  
Comment

Acquisition Date 5/18/2010 2:39:14 PM

Operator VIKAS GROVER  
Instrument / Ser# maXis 40

### Acquisition Parameter

|             |            |                       |           |                  |           |
|-------------|------------|-----------------------|-----------|------------------|-----------|
| Source Type | ESI        | Ion Polarity          | Positive  | Set Nebulizer    | 0.4 Bar   |
| Focus       | Not active | Set Capillary         | 4500 V    | Set Dry Heater   | 180 °C    |
| Scan Begin  | 50 m/z     | Set End Plate Offset  | -500 V    | Set Dry Gas      | 4.0 l/min |
| Scan End    | 800 m/z    | Set Collision Cell RF | 300.0 Vpp | Set Divert Valve | Source    |

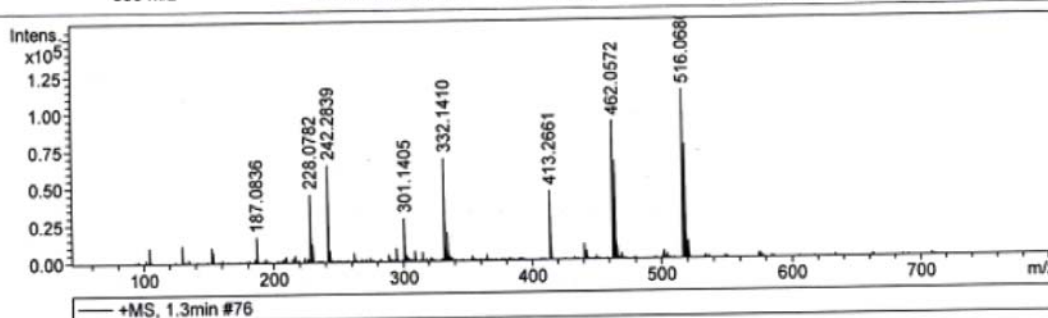

| #  | m/z      | Res.  | S/N    | I      | FWHM   |
|----|----------|-------|--------|--------|--------|
| 1  | 187.0836 | 22909 | 1352.8 | 16542  | 0.0082 |
| 2  | 228.0782 | 24547 | 2346.7 | 45375  | 0.0093 |
| 3  | 242.2839 | 23894 | 3383.0 | 64496  | 0.0101 |
| 4  | 301.1405 | 24175 | 1053.2 | 28747  | 0.0125 |
| 5  | 332.1410 | 24090 | 2103.4 | 68748  | 0.0138 |
| 6  | 413.2661 | 25711 | 1657.5 | 46152  | 0.0161 |
| 7  | 462.0572 | 23682 | 2797.0 | 92261  | 0.0195 |
| 8  | 463.0598 | 27211 | 631.2  | 20891  | 0.0170 |
| 9  | 464.0544 | 24964 | 1977.5 | 65674  | 0.0186 |
| 10 | 516.0680 | 24486 | 2943.6 | 112464 | 0.0211 |
| 11 | 517.0707 | 26952 | 713.8  | 27333  | 0.0192 |
| 12 | 518.0655 | 24400 | 1987.9 | 76303  | 0.0212 |
| 13 | 519.0677 | 27323 | 429.3  | 16517  | 0.0190 |

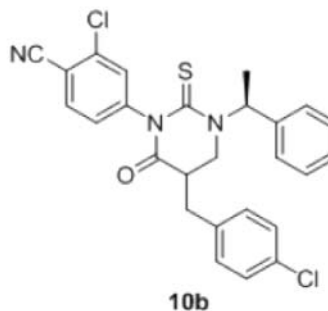

Exact Mass: 493.0782

$[M+Na]^+ = 516.0680$



## Mass Spectrum List Report

### Analysis Info

Analysis Name D:\Data\vipin\10-05-18-VK-10C.d  
Method tune\_low.m  
Sample Name VK-10C  
Comment

Acquisition Date 5/18/2010 3:11:01 PM

Operator VIKAS GROVER  
Instrument / Ser# maXis 40

### Acquisition Parameter

|             |            |                       |           |                  |           |
|-------------|------------|-----------------------|-----------|------------------|-----------|
| Source Type | ESI        | Ion Polarity          | Positive  | Set Nebulizer    | 0.4 Bar   |
| Focus       | Not active | Set Capillary         | 4500 V    | Set Dry Heater   | 180 °C    |
| Scan Begin  | 50 m/z     | Set End Plate Offset  | -500 V    | Set Dry Gas      | 4.0 l/min |
| Scan End    | 800 m/z    | Set Collision Cell RF | 300.0 Vpp | Set Divert Valve | Source    |

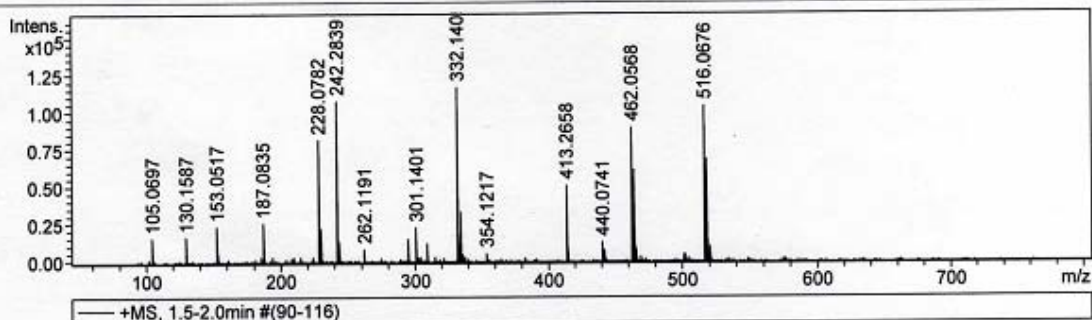

| #  | m/z      | Res.  | S/N    | I      | FWHM   |
|----|----------|-------|--------|--------|--------|
| 1  | 105.0697 | 23556 | 6368.8 | 16098  | 0.0045 |
| 2  | 130.1587 | 25510 | 3637.7 | 16927  | 0.0051 |
| 3  | 153.0517 | 25267 | 3210.9 | 24008  | 0.0061 |
| 4  | 187.0835 | 23527 | 2002.4 | 26043  | 0.0080 |
| 5  | 228.0782 | 23134 | 4095.7 | 81613  | 0.0099 |
| 6  | 242.2839 | 22172 | 5713.4 | 107838 | 0.0109 |
| 7  | 262.1191 | 25820 | 506.9  | 8823   | 0.0102 |
| 8  | 295.1140 | 25477 | 643.3  | 15294  | 0.0116 |
| 9  | 301.1401 | 25161 | 903.4  | 23235  | 0.0120 |
| 10 | 309.1297 | 26783 | 437.1  | 12368  | 0.0115 |
| 11 | 332.1409 | 23018 | 3794.9 | 116922 | 0.0144 |
| 12 | 354.1217 | 27000 | 232.4  | 5874   | 0.0131 |
| 13 | 413.2658 | 25787 | 2246.1 | 51200  | 0.0160 |
| 14 | 440.0741 | 26533 | 524.9  | 13052  | 0.0166 |
| 15 | 462.0568 | 24277 | 3351.9 | 89662  | 0.0190 |
| 16 | 516.0676 | 24658 | 3350.6 | 103859 | 0.0209 |
| 17 | 517.0701 | 26471 | 776.2  | 24116  | 0.0195 |
| 18 | 518.0649 | 24135 | 2205.5 | 68691  | 0.0215 |
| 19 | 519.0671 | 26711 | 477.5  | 14907  | 0.0194 |
| 20 | 520.0623 | 25431 | 322.1  | 10082  | 0.0204 |

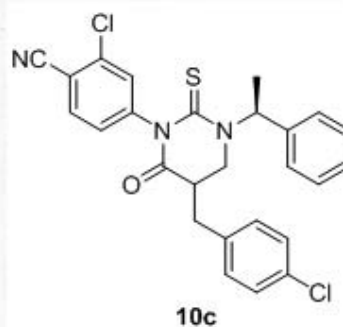

10c

Exact Mass: 493.0782

$[M+Na]^+ = 516.0680$

## Mass Spectrum List Report

### Analysis Info

Analysis Name D:\Data\vipin\10-05-18-VK-6AI-R.d  
Method tune\_low.m  
Sample Name VK-6AI-R  
Comment

Acquisition Date 5/18/2010 3:45:31 PM

Operator VIKAS GROVER  
Instrument / Ser# maXis 40

### Acquisition Parameter

|             |            |                       |           |                  |           |
|-------------|------------|-----------------------|-----------|------------------|-----------|
| Source Type | ESI        | Ion Polarity          | Positive  | Set Nebulizer    | 0.4 Bar   |
| Focus       | Not active | Set Capillary         | 4500 V    | Set Dry Heater   | 180 °C    |
| Scan Begin  | 50 m/z     | Set End Plate Offset  | -500 V    | Set Dry Gas      | 4.0 l/min |
| Scan End    | 700 m/z    | Set Collision Cell RF | 300.0 Vpp | Set Divert Valve | Source    |

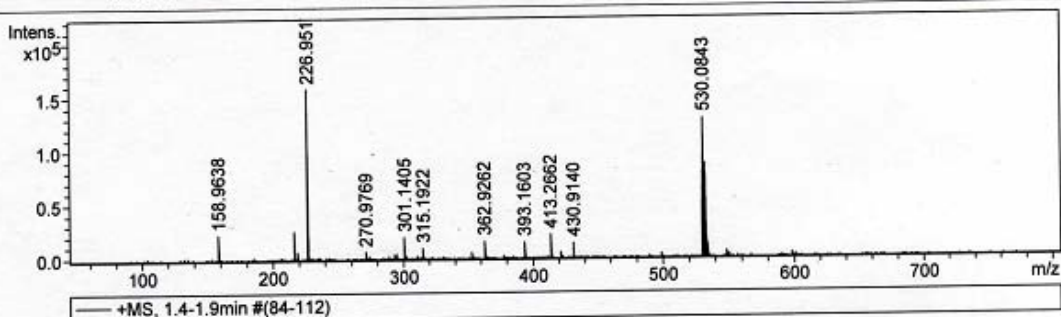

| #  | m/z      | Res.  | S/N     | I      | FWHM   |
|----|----------|-------|---------|--------|--------|
| 1  | 158.9638 | 21846 | 8250.7  | 22641  | 0.0073 |
| 2  | 216.9223 | 22164 | 2434.6  | 25679  | 0.0098 |
| 3  | 226.9517 | 21152 | 14037.7 | 157461 | 0.0107 |
| 4  | 270.9769 | 26383 | 673.2   | 6388   | 0.0103 |
| 5  | 301.1405 | 25903 | 1799.6  | 20350  | 0.0116 |
| 6  | 315.1922 | 26342 | 803.2   | 9840   | 0.0120 |
| 7  | 352.8970 | 26163 | 437.9   | 5939   | 0.0135 |
| 8  | 362.9262 | 24705 | 1159.0  | 16015  | 0.0147 |
| 9  | 393.1603 | 26482 | 1077.8  | 15380  | 0.0148 |
| 10 | 413.2662 | 27188 | 1500.8  | 21679  | 0.0152 |
| 11 | 430.9140 | 26302 | 1000.8  | 14093  | 0.0164 |
| 12 | 530.0843 | 24544 | 5990.7  | 128468 | 0.0216 |
| 13 | 531.0868 | 26444 | 1544.8  | 32751  | 0.0201 |
| 14 | 532.0817 | 24149 | 4169.2  | 87388  | 0.0220 |
| 15 | 533.0842 | 26392 | 978.7   | 20277  | 0.0202 |
| 16 | 534.0792 | 24840 | 641.7   | 13140  | 0.0215 |
| 17 | 535.0814 | 25095 | 134.8   | 2728   | 0.0213 |

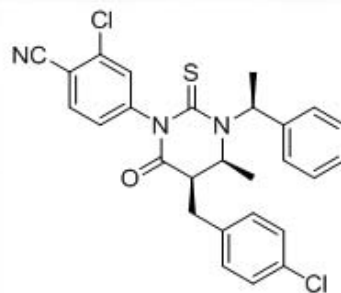

6ai

Exact Mass: 507.0939

$[M+Na]^+ = 530.0837$

## Mass Spectrum List Report

### Analysis Info

Analysis Name D:\Data\vipin\10-05-18-VK-6BI.d  
Method tune\_low.m  
Sample Name VK-6BI  
Comment

Acquisition Date 5/18/2010 4:07:52 PM

Operator VIKAS GROVER  
Instrument / Ser# maXis 40

### Acquisition Parameter

|             |            |                       |           |                  |           |
|-------------|------------|-----------------------|-----------|------------------|-----------|
| Source Type | ESI        | Ion Polarity          | Positive  | Set Nebulizer    | 0.4 Bar   |
| Focus       | Not active | Set Capillary         | 4500 V    | Set Dry Heater   | 180 °C    |
| Scan Begin  | 50 m/z     | Set End Plate Offset  | -500 V    | Set Dry Gas      | 4.0 l/min |
| Scan End    | 700 m/z    | Set Collision Cell RF | 300.0 Vpp | Set Divert Valve | Source    |

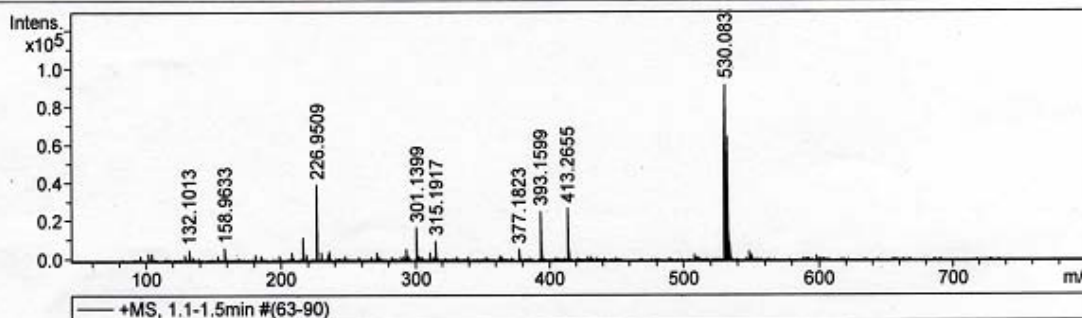

| #  | m/z      | Res.  | S/N    | I     | FWHM   |
|----|----------|-------|--------|-------|--------|
| 1  | 132.1013 | 26731 | 2269.6 | 5292  | 0.0049 |
| 2  | 158.9633 | 26791 | 2009.3 | 6251  | 0.0059 |
| 3  | 216.9217 | 24733 | 1264.0 | 11427 | 0.0088 |
| 4  | 226.9509 | 22647 | 4053.9 | 39159 | 0.0100 |
| 5  | 282.2777 | 25803 | 139.3  | 1383  | 0.0109 |
| 6  | 293.0802 | 24490 | 547.2  | 5800  | 0.0120 |
| 7  | 301.1399 | 25572 | 1499.6 | 16647 | 0.0118 |
| 8  | 315.1917 | 25582 | 833.9  | 9987  | 0.0123 |
| 9  | 377.1823 | 25639 | 441.7  | 5500  | 0.0147 |
| 10 | 393.1599 | 25745 | 2038.4 | 25445 | 0.0153 |
| 11 | 413.2655 | 26260 | 2137.2 | 26759 | 0.0157 |
| 12 | 530.0832 | 24034 | 5106.4 | 91350 | 0.0221 |
| 13 | 531.0856 | 26889 | 1340.0 | 23673 | 0.0198 |
| 14 | 532.0805 | 24927 | 3656.9 | 63801 | 0.0213 |
| 15 | 533.0828 | 26630 | 846.2  | 14577 | 0.0200 |
| 16 | 534.0780 | 24245 | 529.8  | 9009  | 0.0220 |
| 17 | 548.0916 | 27157 | 312.4  | 4344  | 0.0202 |

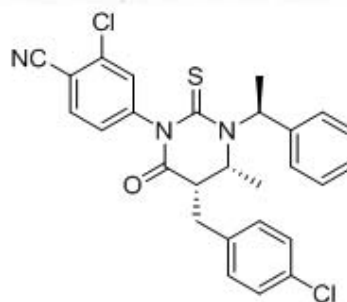

6bi

Exact Mass: 507.0939  
[M+Na]<sup>+</sup> = 530.0837



## Mass Spectrum List Report

### Analysis Info

Analysis Name D:\Data\vipin\10-05-18-VK-6BII.d  
Method tune\_low.m  
Sample Name VK-6BII  
Comment

Acquisition Date 5/18/2010 4:37:26 PM

Operator VIKAS GROVER  
Instrument / Ser# maXis 40

### Acquisition Parameter

|             |            |                       |           |                  |           |
|-------------|------------|-----------------------|-----------|------------------|-----------|
| Source Type | ESI        | Ion Polarity          | Positive  | Set Nebulizer    | 0.4 Bar   |
| Focus       | Not active | Set Capillary         | 4500 V    | Set Dry Heater   | 180 °C    |
| Scan Begin  | 50 m/z     | Set End Plate Offset  | -500 V    | Set Dry Gas      | 4.0 l/min |
| Scan End    | 700 m/z    | Set Collision Cell RF | 300.0 Vpp | Set Divert Valve | Source    |

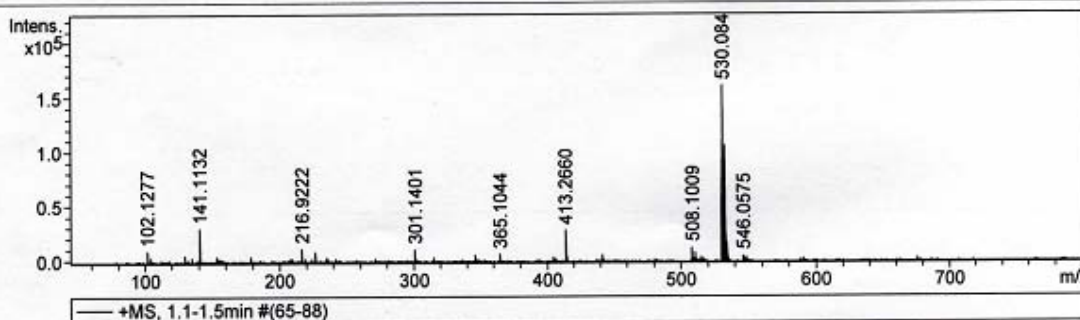

| #  | m/z      | Res.  | S/N    | I      | FWHM   |
|----|----------|-------|--------|--------|--------|
| 1  | 102.1277 | 17509 | 2403.2 | 9678   | 0.0058 |
| 2  | 141.1132 | 19889 | 4655.2 | 30394  | 0.0071 |
| 3  | 216.9222 | 25952 | 943.6  | 12089  | 0.0084 |
| 4  | 301.1401 | 26524 | 758.0  | 11449  | 0.0114 |
| 5  | 315.1917 | 26245 | 226.6  | 3636   | 0.0120 |
| 6  | 365.1044 | 25857 | 440.8  | 6610   | 0.0141 |
| 7  | 413.2660 | 26377 | 1642.8 | 28207  | 0.0157 |
| 8  | 508.1009 | 27814 | 440.8  | 12147  | 0.0183 |
| 9  | 510.0983 | 27813 | 286.3  | 8118   | 0.0183 |
| 10 | 511.1012 | 26485 | 69.7   | 2004   | 0.0193 |
| 11 | 512.0960 | 24051 | 45.4   | 1323   | 0.0213 |
| 12 | 514.1053 | 27678 | 131.9  | 3952   | 0.0186 |
| 13 | 516.1084 | 16700 | 83.9   | 2579   | 0.0309 |
| 14 | 518.1137 | 18280 | 27.5   | 867    | 0.0283 |
| 15 | 530.0841 | 24219 | 4816.5 | 159828 | 0.0219 |
| 16 | 531.0865 | 25258 | 1254.5 | 41092  | 0.0210 |
| 17 | 532.0814 | 23003 | 3275.3 | 105904 | 0.0231 |
| 18 | 533.0836 | 26321 | 824.8  | 26318  | 0.0203 |
| 19 | 534.0789 | 25747 | 556.1  | 17509  | 0.0207 |
| 20 | 535.0806 | 26911 | 119.6  | 3714   | 0.0199 |
| 21 | 539.3253 | 21253 | 3.1    | 91     | 0.0254 |
| 22 | 546.0575 | 27816 | 194.4  | 5135   | 0.0196 |
| 23 | 804.6421 | 20677 | 9.3    | 73     | 0.0389 |

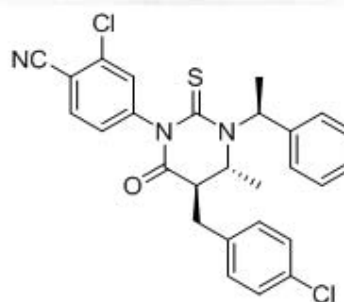

6bii

Exact Mass: 507.0939

$[M+Na]^+ = 530.0837$

## Mass Spectrum List Report

### Analysis Info

Analysis Name D:\Data\vipin\10-05-19-VK-6ci.d  
Method tune\_low.m  
Sample Name VK-6ci  
Comment

Acquisition Date 5/19/2010 9:24:16 AM

Operator VIKAS GROVER  
Instrument / Ser# maXis 40

### Acquisition Parameter

|             |            |                       |           |                  |           |
|-------------|------------|-----------------------|-----------|------------------|-----------|
| Source Type | ESI        | Ion Polarity          | Positive  | Set Nebulizer    | 0.4 Bar   |
| Focus       | Not active | Set Capillary         | 4500 V    | Set Dry Heater   | 180 °C    |
| Scan Begin  | 50 m/z     | Set End Plate Offset  | -500 V    | Set Dry Gas      | 4.0 l/min |
| Scan End    | 800 m/z    | Set Collision Cell RF | 300.0 Vpp | Set Divert Valve | Source    |

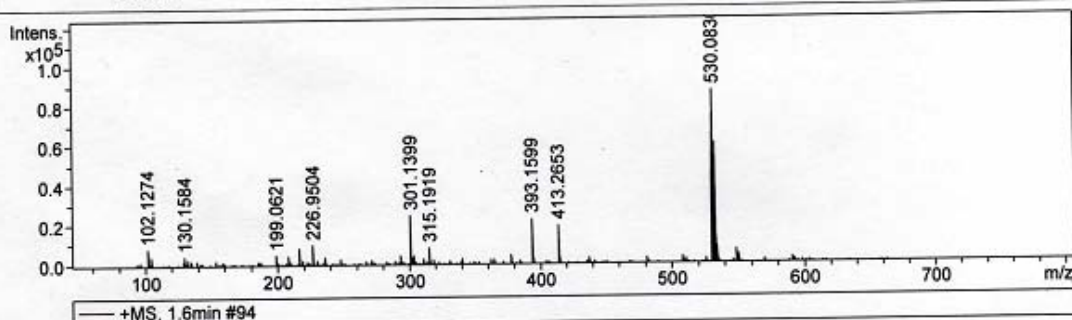

| #  | m/z      | Res.  | S/N    | I     | FWHM   |
|----|----------|-------|--------|-------|--------|
| 1  | 102.1274 | 18195 | 2584.0 | 8276  | 0.0056 |
| 2  | 130.1584 | 22899 | 970.7  | 4816  | 0.0057 |
| 3  | 185.1138 | 22844 | 252.0  | 1990  | 0.0081 |
| 4  | 199.0621 | 23180 | 503.4  | 4943  | 0.0086 |
| 5  | 208.1322 | 23544 | 432.9  | 4792  | 0.0088 |
| 6  | 216.9217 | 22813 | 709.0  | 8708  | 0.0095 |
| 7  | 226.9504 | 24680 | 771.8  | 10130 | 0.0092 |
| 8  | 301.1399 | 24101 | 1468.2 | 24491 | 0.0125 |
| 9  | 315.1919 | 24461 | 473.5  | 8486  | 0.0129 |
| 10 | 393.1599 | 25644 | 1223.2 | 22526 | 0.0153 |
| 11 | 413.2653 | 25918 | 1059.7 | 19121 | 0.0159 |
| 12 | 530.0830 | 24546 | 3220.0 | 86460 | 0.0216 |
| 13 | 531.0855 | 26537 | 809.7  | 21536 | 0.0200 |
| 14 | 531.5046 | 28885 | 3.2    | 84    | 0.0184 |
| 15 | 532.0806 | 25067 | 2286.4 | 60239 | 0.0212 |
| 16 | 533.0829 | 27021 | 527.7  | 13770 | 0.0197 |
| 17 | 534.0778 | 24584 | 328.7  | 8501  | 0.0217 |
| 18 | 535.0800 | 26050 | 74.5   | 1906  | 0.0205 |
| 19 | 548.0920 | 25701 | 312.6  | 6973  | 0.0213 |

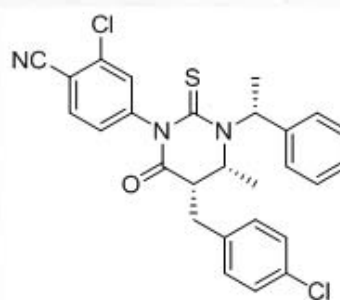

6ci

Exact Mass: 507.0939  
[M+Na]<sup>+</sup> = 530.0837

## Mass Spectrum List Report

### Analysis Info

Analysis Name D:\Data\vipin\10-05-19-VK-6di-r.d  
Method tune\_low.m  
Sample Name VK-6di-r  
Comment

Acquisition Date 5/19/2010 9:42:11 AM

Operator VIKAS GROVER  
Instrument / Ser# maXis 40

### Acquisition Parameter

|             |            |                       |           |                  |           |
|-------------|------------|-----------------------|-----------|------------------|-----------|
| Source Type | ESI        | Ion Polarity          | Positive  | Set Nebulizer    | 0.4 Bar   |
| Focus       | Not active | Set Capillary         | 4500 V    | Set Dry Heater   | 180 °C    |
| Scan Begin  | 50 m/z     | Set End Plate Offset  | -500 V    | Set Dry Gas      | 4.0 l/min |
| Scan End    | 800 m/z    | Set Collision Cell RF | 300.0 Vpp | Set Divert Valve | Source    |

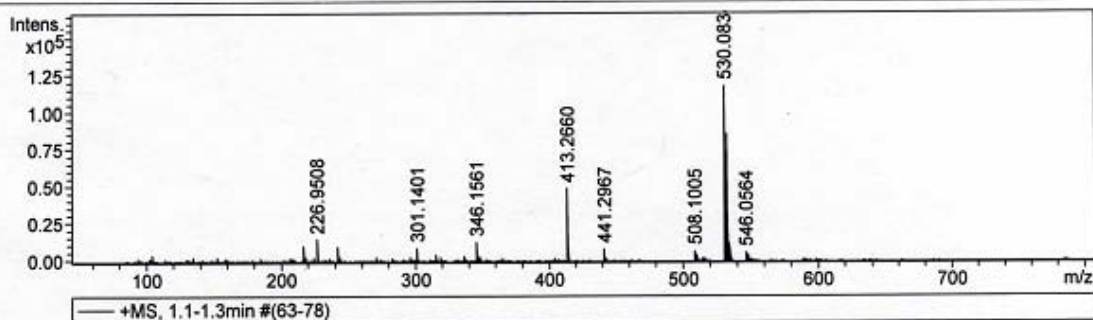

| #  | m/z      | Res.  | S/N    | I      | FWHM   |
|----|----------|-------|--------|--------|--------|
| 1  | 216.9220 | 22947 | 970.1  | 10064  | 0.0095 |
| 2  | 226.9508 | 23475 | 1356.5 | 14707  | 0.0097 |
| 3  | 242.0933 | 23910 | 944.0  | 9820   | 0.0101 |
| 4  | 301.1401 | 24257 | 797.8  | 8895   | 0.0124 |
| 5  | 315.1919 | 25069 | 374.4  | 4480   | 0.0126 |
| 6  | 346.1561 | 26841 | 1156.7 | 12948  | 0.0129 |
| 7  | 413.2660 | 25414 | 4084.8 | 48903  | 0.0163 |
| 8  | 441.2967 | 27099 | 747.6  | 8442   | 0.0163 |
| 9  | 508.1005 | 26759 | 388.0  | 6871   | 0.0190 |
| 10 | 530.0834 | 23193 | 5369.7 | 117587 | 0.0229 |
| 11 | 531.0859 | 26742 | 1506.6 | 32578  | 0.0199 |
| 12 | 532.0808 | 24227 | 4003.2 | 85471  | 0.0220 |
| 13 | 533.0830 | 26864 | 948.7  | 19996  | 0.0198 |
| 14 | 534.0781 | 24506 | 572.4  | 11909  | 0.0218 |
| 15 | 546.0564 | 27166 | 316.2  | 5542   | 0.0201 |

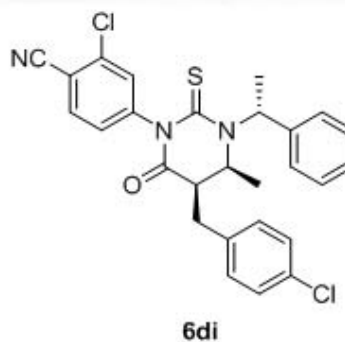

Exact Mass: 507.0939  
[M+Na]<sup>+</sup> = 530.0837

## Mass Spectrum List Report

### Analysis Info

Analysis Name D:\Data\vipin\10-05-19-VK-6dii.d  
Method tune\_low.m  
Sample Name VK-6dii  
Comment

Acquisition Date 5/19/2010 9:53:41 AM

Operator VIKAS GROVER  
Instrument / Ser# maXis 40

### Acquisition Parameter

|             |            |                       |           |                  |           |
|-------------|------------|-----------------------|-----------|------------------|-----------|
| Source Type | ESI        | Ion Polarity          | Positive  | Set Nebulizer    | 0.4 Bar   |
| Focus       | Not active | Set Capillary         | 4500 V    | Set Dry Heater   | 180 °C    |
| Scan Begin  | 50 m/z     | Set End Plate Offset  | -500 V    | Set Dry Gas      | 4.0 l/min |
| Scan End    | 800 m/z    | Set Collision Cell RF | 300.0 Vpp | Set Divert Valve | Source    |

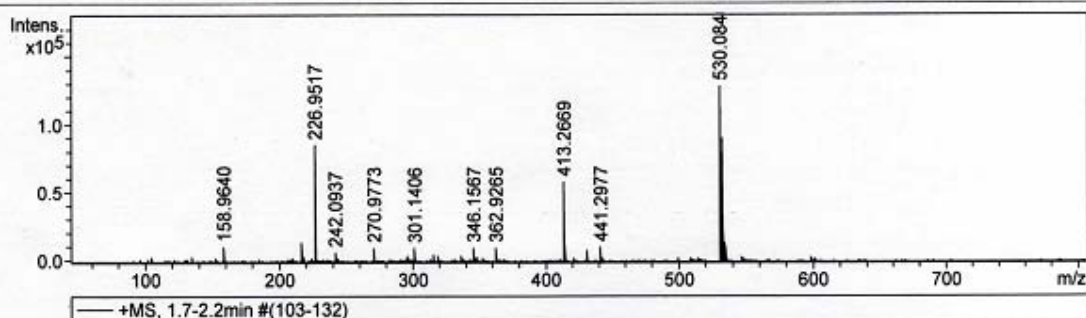

| #  | m/z      | Res.  | S/N    | I      | FWHM   |
|----|----------|-------|--------|--------|--------|
| 1  | 158.9640 | 22629 | 3888.5 | 10782  | 0.0070 |
| 2  | 216.9224 | 22666 | 1358.6 | 13473  | 0.0096 |
| 3  | 226.9517 | 21790 | 8145.1 | 85155  | 0.0104 |
| 4  | 242.0937 | 25410 | 691.7  | 6668   | 0.0095 |
| 5  | 270.9773 | 24969 | 1221.3 | 9874   | 0.0109 |
| 6  | 301.1406 | 25128 | 994.2  | 9403   | 0.0120 |
| 7  | 315.1926 | 24648 | 490.8  | 5003   | 0.0128 |
| 8  | 346.1567 | 26801 | 976.0  | 9768   | 0.0129 |
| 9  | 362.9265 | 24000 | 1020.5 | 9740   | 0.0151 |
| 10 | 413.2669 | 24311 | 4872.3 | 57892  | 0.0170 |
| 11 | 430.9142 | 23432 | 692.7  | 8353   | 0.0184 |
| 12 | 441.2977 | 26965 | 936.1  | 10282  | 0.0164 |
| 13 | 530.0846 | 23757 | 6407.6 | 127748 | 0.0223 |
| 14 | 531.0872 | 26268 | 1765.9 | 34745  | 0.0202 |
| 15 | 532.0822 | 23903 | 4661.9 | 90521  | 0.0223 |
| 16 | 533.0843 | 27024 | 1137.7 | 21795  | 0.0197 |
| 17 | 534.0795 | 24646 | 709.8  | 13414  | 0.0217 |

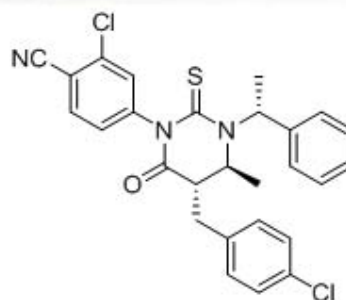

6dii

Exact Mass: 507.0939

[M+Na]<sup>+</sup> = 530.0837



## Mass Spectrum List Report

### Analysis Info

Analysis Name D:\Data\wipin\10-05-19-VK-7ai.d  
Method tune\_low.m  
Sample Name vk-7ai  
Comment

Acquisition Date 5/19/2010 1:55:43 PM

Operator VIKAS GROVER  
Instrument / Ser# maXis 40

### Acquisition Parameter

|             |            |                       |           |                  |           |
|-------------|------------|-----------------------|-----------|------------------|-----------|
| Source Type | ESI        | Ion Polarity          | Positive  | Set Nebulizer    | 0.4 Bar   |
| Focus       | Not active | Set Capillary         | 4500 V    | Set Dry Heater   | 180 °C    |
| Scan Begin  | 50 m/z     | Set End Plate Offset  | -500 V    | Set Dry Gas      | 4.0 l/min |
| Scan End    | 700 m/z    | Set Collision Cell RF | 300.0 Vpp | Set Divert Valve | Source    |

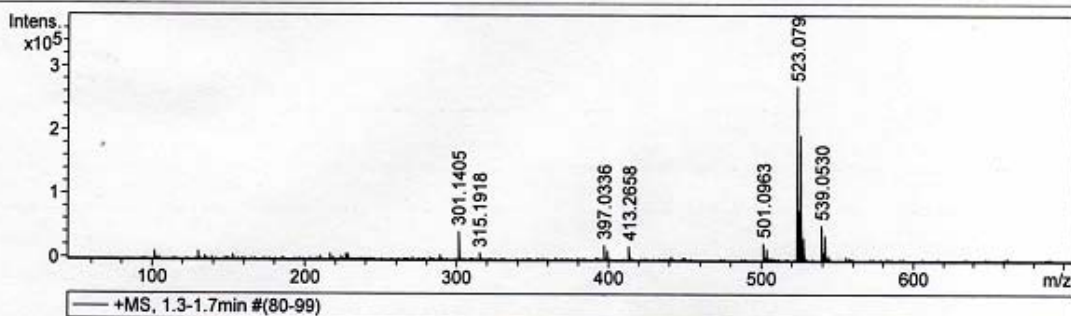

| #  | m/z      | Res.  | S/N    | I      | FWHM   |
|----|----------|-------|--------|--------|--------|
| 1  | 301.1405 | 25329 | 2557.1 | 43471  | 0.0119 |
| 2  | 315.1918 | 27653 | 558.6  | 9167   | 0.0114 |
| 3  | 397.0336 | 27608 | 1297.1 | 22636  | 0.0144 |
| 4  | 413.2658 | 26387 | 1092.1 | 20405  | 0.0157 |
| 5  | 501.0963 | 26822 | 628.1  | 25529  | 0.0187 |
| 6  | 523.0792 | 22635 | 7482.9 | 269964 | 0.0231 |
| 7  | 524.0820 | 24864 | 2173.2 | 77216  | 0.0211 |
| 8  | 525.0767 | 22978 | 5519.5 | 193119 | 0.0229 |
| 9  | 526.0790 | 26252 | 1438.6 | 49548  | 0.0200 |
| 10 | 527.0740 | 25177 | 998.5  | 33851  | 0.0209 |
| 11 | 528.0753 | 27047 | 180.4  | 6016   | 0.0195 |
| 12 | 528.4821 | 27651 | 2.7    | 91     | 0.0191 |
| 13 | 539.0530 | 26105 | 1949.7 | 53380  | 0.0206 |
| 14 | 540.0555 | 27020 | 409.3  | 10982  | 0.0200 |
| 15 | 541.0505 | 26119 | 1461.3 | 38420  | 0.0207 |

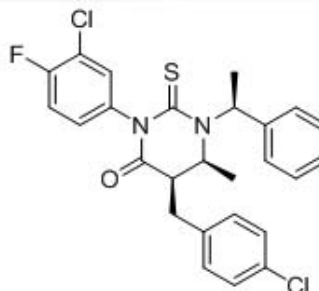

7ai

Exact Mass: 500.0892

[M+Na]<sup>+</sup> = 523.0790



## Mass Spectrum List Report

### Analysis Info

Analysis Name D:\Data\vipin\10-05-19-VK-7bi.d  
Method tune\_low.m  
Sample Name vk-7bi  
Comment

Acquisition Date 5/19/2010 2:04:10 PM

Operator VIKAS GROVER  
Instrument / Ser# maXis 40

### Acquisition Parameter

|             |            |                       |           |                  |           |
|-------------|------------|-----------------------|-----------|------------------|-----------|
| Source Type | ESI        | Ion Polarity          | Positive  | Set Nebulizer    | 0.4 Bar   |
| Focus       | Not active | Set Capillary         | 4500 V    | Set Dry Heater   | 180 °C    |
| Scan Begin  | 50 m/z     | Set End Plate Offset  | -500 V    | Set Dry Gas      | 4.0 l/min |
| Scan End    | 700 m/z    | Set Collision Cell RF | 300.0 Vpp | Set Divert Valve | Source    |

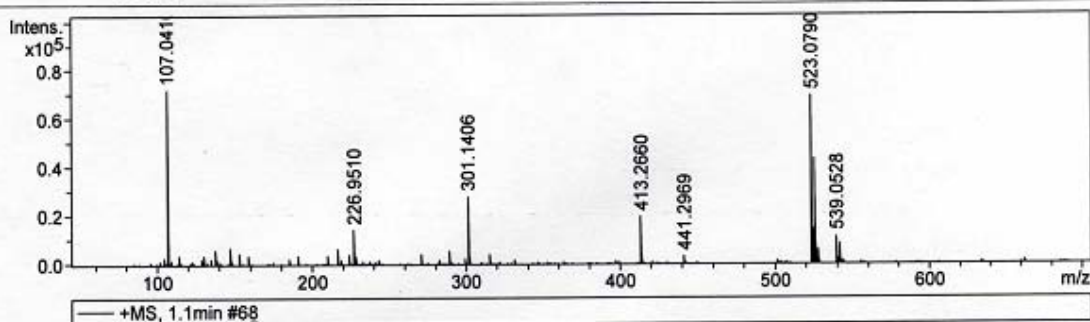

| #  | m/z      | Res.  | S/N   | I     | FWHM   |
|----|----------|-------|-------|-------|--------|
| 1  | 107.0410 | 17763 | 254.7 | 71839 | 0.0060 |
| 2  | 226.9510 | 25789 | 126.7 | 14352 | 0.0088 |
| 3  | 301.1406 | 26063 | 209.2 | 27967 | 0.0116 |
| 4  | 413.2660 | 26955 | 206.8 | 19413 | 0.0153 |
| 5  | 441.2969 | 27281 | 44.3  | 3226  | 0.0162 |
| 6  | 523.0790 | 25617 | 755.1 | 68892 | 0.0204 |
| 7  | 524.0816 | 26429 | 156.8 | 14266 | 0.0198 |
| 8  | 525.0764 | 25085 | 477.2 | 43313 | 0.0209 |
| 9  | 526.0786 | 27355 | 96.1  | 8696  | 0.0192 |
| 10 | 527.0739 | 25244 | 65.6  | 5920  | 0.0209 |
| 11 | 528.0761 | 26454 | 14.5  | 1309  | 0.0200 |
| 12 | 539.0528 | 26509 | 130.3 | 11399 | 0.0203 |
| 13 | 541.0502 | 26919 | 96.2  | 8373  | 0.0201 |

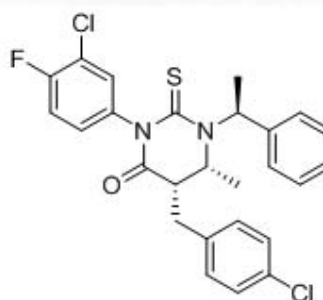

7bi

Exact Mass: 500.0892

$[M+Na]^+ = 523.0790$

## Mass Spectrum List Report

### Analysis Info

Analysis Name D:\Data\vipin\10-05-19-VK-7bii.d  
Method tune\_low.m  
Sample Name vk-7bii  
Comment

Acquisition Date 5/19/2010 2:11:04 PM

Operator VIKAS GROVER  
Instrument / Ser# maXis 40

### Acquisition Parameter

|             |            |                       |           |                  |           |
|-------------|------------|-----------------------|-----------|------------------|-----------|
| Source Type | ESI        | Ion Polarity          | Positive  | Set Nebulizer    | 0.4 Bar   |
| Focus       | Not active | Set Capillary         | 4500 V    | Set Dry Heater   | 180 °C    |
| Scan Begin  | 50 m/z     | Set End Plate Offset  | -500 V    | Set Dry Gas      | 4.0 l/min |
| Scan End    | 700 m/z    | Set Collision Cell RF | 300.0 Vpp | Set Divert Valve | Source    |

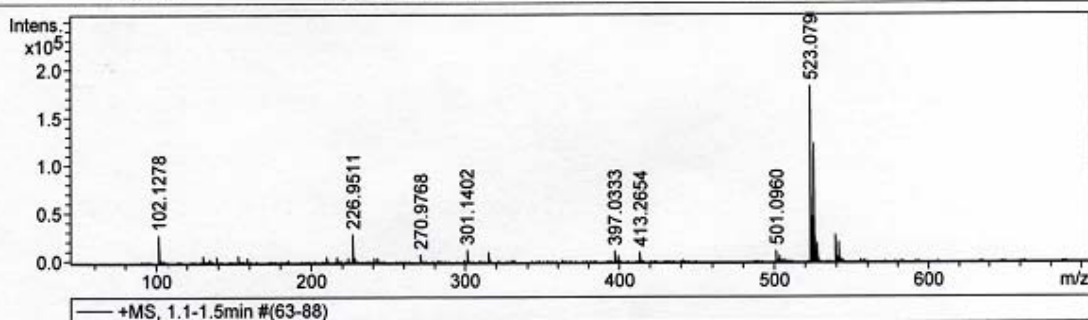

| #  | m/z      | Res.  | S/N     | I      | FWHM   |
|----|----------|-------|---------|--------|--------|
| 1  | 102.1278 | 17768 | 12887.1 | 27467  | 0.0057 |
| 2  | 226.9511 | 23895 | 3136.8  | 28434  | 0.0095 |
| 3  | 270.9768 | 26345 | 654.7   | 7325   | 0.0103 |
| 4  | 301.1402 | 26898 | 1153.6  | 12435  | 0.0112 |
| 5  | 331.1860 | 25097 | 253.2   | 2510   | 0.0132 |
| 6  | 397.0333 | 27744 | 1049.8  | 10855  | 0.0143 |
| 7  | 413.2654 | 27493 | 888.6   | 9912   | 0.0150 |
| 8  | 501.0960 | 27887 | 435.2   | 10989  | 0.0180 |
| 9  | 523.0790 | 23347 | 8204.8  | 181858 | 0.0224 |
| 10 | 524.0817 | 24868 | 2113.9  | 46086  | 0.0211 |
| 11 | 525.0765 | 22656 | 5731.6  | 122884 | 0.0232 |
| 12 | 526.0787 | 25824 | 1334.2  | 28119  | 0.0204 |
| 13 | 527.0738 | 25239 | 942.0   | 19518  | 0.0209 |
| 14 | 539.0527 | 26508 | 1701.6  | 27848  | 0.0203 |
| 15 | 540.0553 | 25950 | 346.4   | 5543   | 0.0208 |
| 16 | 541.0503 | 26514 | 1293.7  | 20236  | 0.0204 |

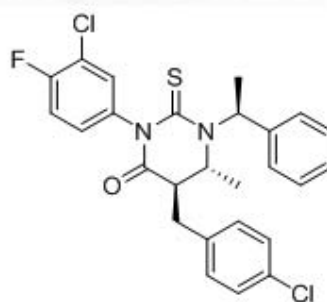

7bii

Exact Mass: 500.0892

[M+Na]<sup>+</sup> = 523.0790

## Mass Spectrum List Report

### Analysis Info

Analysis Name D:\Data\vipin\10-05-19-VK-8ai.d  
Method tune\_low.m  
Sample Name vk-8ai  
Comment

Acquisition Date 5/19/2010 2:19:23 PM

Operator VIKAS GROVER  
Instrument / Ser# maXis 40

### Acquisition Parameter

|             |            |                       |           |                  |           |
|-------------|------------|-----------------------|-----------|------------------|-----------|
| Source Type | ESI        | Ion Polarity          | Positive  | Set Nebulizer    | 0.4 Bar   |
| Focus       | Not active | Set Capillary         | 4500 V    | Set Dry Heater   | 180 °C    |
| Scan Begin  | 50 m/z     | Set End Plate Offset  | -500 V    | Set Dry Gas      | 4.0 l/min |
| Scan End    | 700 m/z    | Set Collision Cell RF | 300.0 Vpp | Set Divert Valve | Source    |

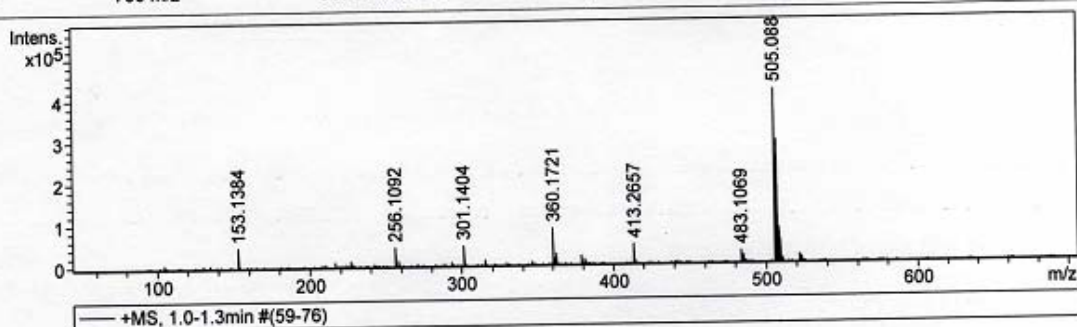

| #  | m/z      | Res.  | S/N    | I      | FWHM   |
|----|----------|-------|--------|--------|--------|
| 1  | 153.1384 | 20911 | 6861.9 | 45963  | 0.0073 |
| 2  | 256.1092 | 22426 | 2651.5 | 44796  | 0.0114 |
| 3  | 301.1404 | 24832 | 2450.9 | 47638  | 0.0121 |
| 4  | 360.1721 | 23392 | 3112.3 | 86810  | 0.0154 |
| 5  | 413.2657 | 25880 | 2178.9 | 46428  | 0.0160 |
| 6  | 483.1069 | 24669 | 771.8  | 29253  | 0.0196 |
| 7  | 505.0884 | 22223 | 6945.8 | 413441 | 0.0227 |
| 8  | 506.0912 | 22907 | 1954.7 | 118278 | 0.0221 |
| 9  | 507.0859 | 21956 | 4781.2 | 292075 | 0.0231 |
| 10 | 508.0883 | 24501 | 1358.1 | 81428  | 0.0207 |
| 11 | 509.0833 | 23406 | 930.4  | 54736  | 0.0217 |
| 12 | 510.0849 | 26628 | 183.6  | 10595  | 0.0192 |

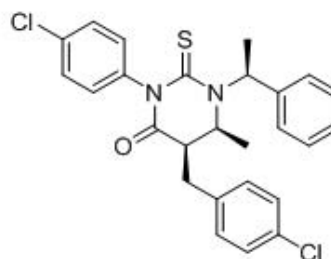

8ai

Exact Mass: 482.0986

$[M+Na]^+ = 505.0884$

## Mass Spectrum List Report

### Analysis Info

Analysis Name D:\Data\vipin\10-05-19-VK-8bi.d  
Method tune\_low.m  
Sample Name VK-8bi  
Comment

Acquisition Date 5/19/2010 10:15:08 AM

Operator VIKAS GROVER  
Instrument / Ser# maXis 40

### Acquisition Parameter

|             |            |                       |           |                  |           |
|-------------|------------|-----------------------|-----------|------------------|-----------|
| Source Type | ESI        | Ion Polarity          | Positive  | Set Nebulizer    | 0.4 Bar   |
| Focus       | Not active | Set Capillary         | 4500 V    | Set Dry Heater   | 180 °C    |
| Scan Begin  | 50 m/z     | Set End Plate Offset  | -500 V    | Set Dry Gas      | 4.0 l/min |
| Scan End    | 800 m/z    | Set Collision Cell RF | 300.0 Vpp | Set Divert Valve | Source    |

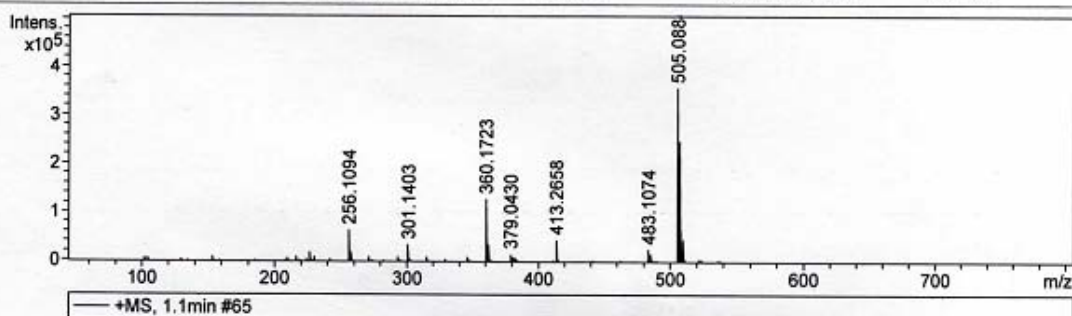

| #  | m/z      | Res.  | S/N    | I      | FWHM   |
|----|----------|-------|--------|--------|--------|
| 1  | 256.1094 | 22438 | 3938.1 | 63511  | 0.0114 |
| 2  | 301.1403 | 25115 | 1824.5 | 34729  | 0.0120 |
| 3  | 360.1723 | 22991 | 4706.2 | 127550 | 0.0157 |
| 4  | 379.0430 | 26307 | 502.7  | 14655  | 0.0144 |
| 5  | 413.2658 | 25781 | 1954.8 | 43934  | 0.0160 |
| 6  | 483.1074 | 24632 | 1073.4 | 24812  | 0.0196 |
| 7  | 505.0884 | 22569 | 4357.3 | 355447 | 0.0224 |
| 8  | 506.0912 | 24157 | 3270.7 | 103841 | 0.0209 |
| 9  | 507.0858 | 22166 | 7694.5 | 247167 | 0.0229 |
| 10 | 508.0882 | 24692 | 2031.4 | 66018  | 0.0206 |
| 11 | 509.0833 | 23842 | 1395.6 | 45876  | 0.0214 |

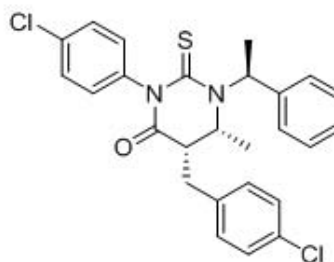

8bi

Exact Mass: 482.0986

$[M+Na]^+ = 505.0884$



## Mass Spectrum List Report

### Analysis Info

Analysis Name D:\Data\vipin\10-05-19-VK-8bii.d  
Method tune\_low.m  
Sample Name VK-8bii  
Comment

Acquisition Date 5/19/2010 10:32:57 AM

Operator VIKAS GROVER  
Instrument / Ser# maXis 40

### Acquisition Parameter

|             |            |                       |           |                  |           |
|-------------|------------|-----------------------|-----------|------------------|-----------|
| Source Type | ESI        | Ion Polarity          | Positive  | Set Nebulizer    | 0.4 Bar   |
| Focus       | Not active | Set Capillary         | 4500 V    | Set Dry Heater   | 180 °C    |
| Scan Begin  | 50 m/z     | Set End Plate Offset  | -500 V    | Set Dry Gas      | 4.0 l/min |
| Scan End    | 800 m/z    | Set Collision Cell RF | 300.0 Vpp | Set Divert Valve | Source    |

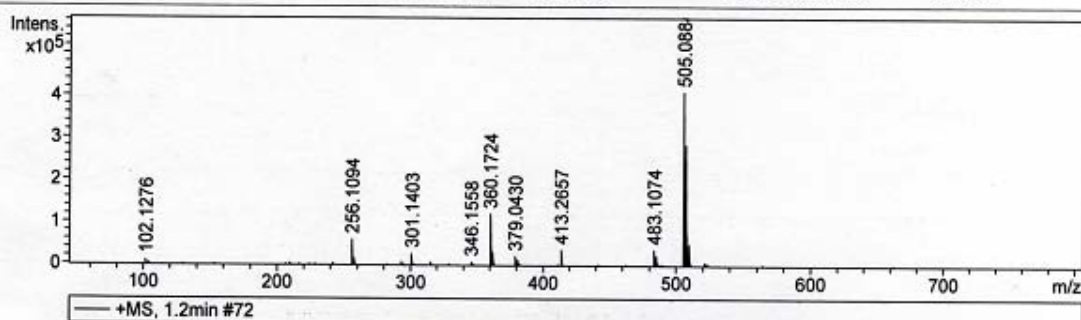

| #  | m/z      | Res.  | S/N     | I      | FWHM   |
|----|----------|-------|---------|--------|--------|
| 1  | 102.1276 | 24196 | 4106.6  | 12289  | 0.0042 |
| 2  | 256.1094 | 22262 | 3679.0  | 61338  | 0.0115 |
| 3  | 301.1403 | 25927 | 1356.9  | 27792  | 0.0116 |
| 4  | 315.1912 | 27087 | 363.3   | 7632   | 0.0116 |
| 5  | 329.1713 | 26654 | 167.0   | 3780   | 0.0123 |
| 6  | 346.1558 | 26219 | 336.2   | 8950   | 0.0132 |
| 7  | 360.1724 | 23157 | 4072.0  | 121783 | 0.0156 |
| 8  | 379.0430 | 24952 | 689.6   | 22241  | 0.0152 |
| 9  | 413.2657 | 26016 | 1516.6  | 38443  | 0.0159 |
| 10 | 483.1074 | 23425 | 1243.0  | 37934  | 0.0206 |
| 11 | 505.0884 | 22864 | 10281.1 | 411035 | 0.0221 |
| 12 | 506.0912 | 23348 | 2888.5  | 116726 | 0.0217 |
| 13 | 507.0858 | 22391 | 6994.5  | 285646 | 0.0226 |
| 14 | 508.0882 | 24723 | 1904.5  | 78596  | 0.0206 |
| 15 | 509.0833 | 22721 | 1249.7  | 52108  | 0.0224 |
| 16 | 510.0846 | 25606 | 231.7   | 9761   | 0.0199 |
| 17 | 521.0623 | 25276 | 200.1   | 9374   | 0.0206 |

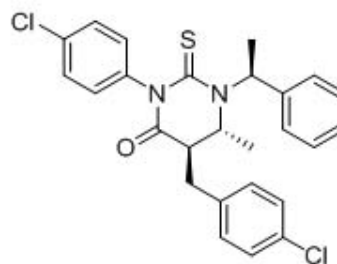

8bii

Exact Mass: 482.0986

$[M+Na]^+ = 505.0884$

## Mass Spectrum List Report

### Analysis Info

Analysis Name D:\Data\vipin\10-05-19-VK-9ai.d  
Method tune\_low.m  
Sample Name VK-9ai  
Comment

Acquisition Date 5/19/2010 11:54:22 AM

Operator VIKAS GROVER  
Instrument / Ser# maXis 40

### Acquisition Parameter

|             |            |                       |           |                  |           |
|-------------|------------|-----------------------|-----------|------------------|-----------|
| Source Type | ESI        | Ion Polarity          | Positive  | Set Nebulizer    | 0.4 Bar   |
| Focus       | Not active | Set Capillary         | 4500 V    | Set Dry Heater   | 180 °C    |
| Scan Begin  | 50 m/z     | Set End Plate Offset  | -500 V    | Set Dry Gas      | 4.0 l/min |
| Scan End    | 800 m/z    | Set Collision Cell RF | 300.0 Vpp | Set Divert Valve | Source    |

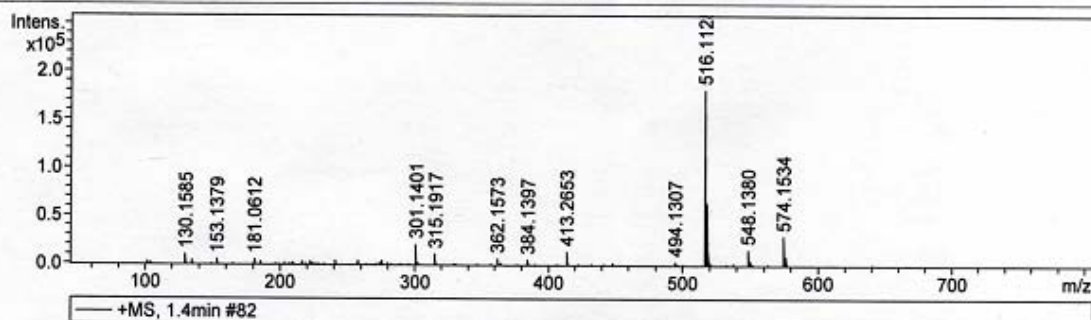

| #  | m/z      | Res.  | S/N    | I      | FWHM   |
|----|----------|-------|--------|--------|--------|
| 1  | 130.1585 | 24734 | 110.3  | 10317  | 0.0053 |
| 2  | 153.1379 | 26165 | 61.3   | 5723   | 0.0059 |
| 3  | 181.0612 | 27024 | 59.2   | 5840   | 0.0067 |
| 4  | 301.1401 | 24720 | 158.5  | 21706  | 0.0122 |
| 5  | 315.1917 | 25323 | 82.2   | 11823  | 0.0124 |
| 6  | 362.1573 | 25602 | 65.2   | 6930   | 0.0141 |
| 7  | 384.1397 | 26753 | 64.5   | 6066   | 0.0144 |
| 8  | 413.2653 | 27058 | 150.2  | 14431  | 0.0153 |
| 9  | 494.1307 | 25683 | 52.2   | 4165   | 0.0192 |
| 10 | 516.1128 | 22799 | 1649.4 | 181441 | 0.0226 |
| 11 | 517.1152 | 23992 | 411.0  | 45779  | 0.0216 |
| 12 | 518.1102 | 22577 | 574.6  | 64787  | 0.0229 |
| 13 | 519.1120 | 26827 | 122.7  | 14001  | 0.0194 |
| 14 | 548.1380 | 27407 | 143.4  | 16546  | 0.0200 |
| 15 | 574.1534 | 26547 | 289.4  | 30416  | 0.0216 |

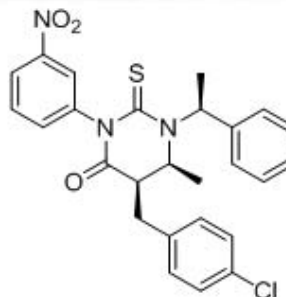

9ai

Exact Mass: 493.1227

$[M+Na]^+ = 516.1125$

## Mass Spectrum List Report

### Analysis Info

Analysis Name D:\Data\vipin\10-05-19-VK-9bi.d  
Method tune\_low.m  
Sample Name VK-9bi  
Comment

Acquisition Date 5/19/2010 12:03:34 PM

Operator VIKAS GROVER  
Instrument / Ser# maXis 40

### Acquisition Parameter

|             |            |                       |           |                  |           |
|-------------|------------|-----------------------|-----------|------------------|-----------|
| Source Type | ESI        | Ion Polarity          | Positive  | Set Nebulizer    | 0.4 Bar   |
| Focus       | Not active | Set Capillary         | 4500 V    | Set Dry Heater   | 180 °C    |
| Scan Begin  | 50 m/z     | Set End Plate Offset  | -500 V    | Set Dry Gas      | 4.0 l/min |
| Scan End    | 800 m/z    | Set Collision Cell RF | 300.0 Vpp | Set Divert Valve | Source    |

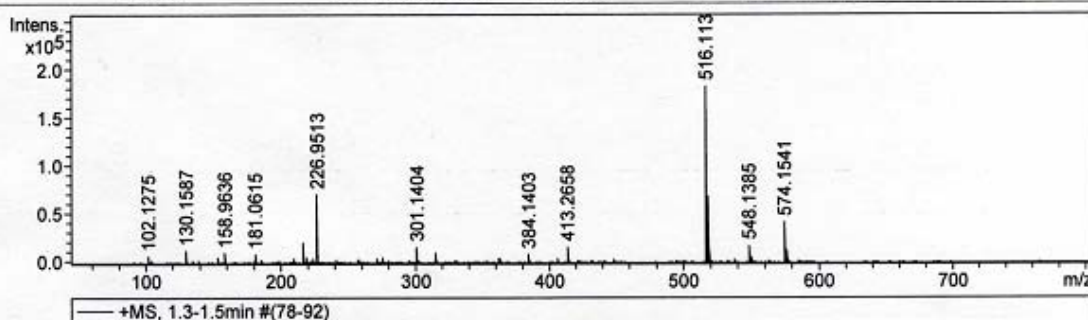

| #  | m/z      | Res.  | S/N    | I      | FWHM   |
|----|----------|-------|--------|--------|--------|
| 1  | 102.1275 | 24063 | 5497.7 | 7078   | 0.0042 |
| 2  | 130.1587 | 23754 | 5620.5 | 12128  | 0.0055 |
| 3  | 158.9636 | 20129 | 2849.1 | 10013  | 0.0079 |
| 4  | 181.0615 | 25700 | 1593.9 | 8592   | 0.0070 |
| 5  | 216.9221 | 26310 | 2025.7 | 20739  | 0.0082 |
| 6  | 226.9513 | 20971 | 6521.1 | 70731  | 0.0108 |
| 7  | 301.1404 | 24677 | 1493.1 | 16315  | 0.0122 |
| 8  | 315.1921 | 25074 | 871.3  | 10026  | 0.0126 |
| 9  | 384.1403 | 26183 | 772.1  | 8764   | 0.0147 |
| 10 | 413.2658 | 26580 | 1312.5 | 16368  | 0.0155 |
| 11 | 516.1133 | 22330 | 8770.2 | 182118 | 0.0231 |
| 12 | 517.1157 | 25122 | 2340.1 | 49302  | 0.0206 |
| 13 | 518.1108 | 23687 | 3207.6 | 68556  | 0.0219 |
| 14 | 519.1127 | 26733 | 665.0  | 14417  | 0.0194 |
| 15 | 548.1385 | 26922 | 906.5  | 17618  | 0.0204 |
| 16 | 574.1541 | 26833 | 2914.4 | 41254  | 0.0214 |

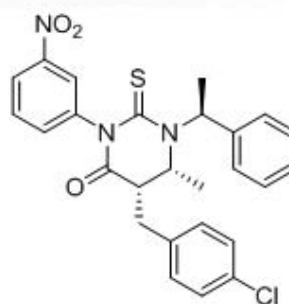

9bi

Exact Mass: 493.1227

[M+Na]<sup>+</sup> = 516.1125

## Mass Spectrum List Report

### Analysis Info

Analysis Name D:\Data\vipin\10-05-19-VK-9bii.d  
Method tune\_low.m  
Sample Name vk-9bii  
Comment

Acquisition Date 5/19/2010 12:15:43 PM

Operator VIKAS GROVER  
Instrument / Ser# maXis 40

### Acquisition Parameter

|             |            |                       |           |                  |           |
|-------------|------------|-----------------------|-----------|------------------|-----------|
| Source Type | ESI        | Ion Polarity          | Positive  | Set Nebulizer    | 0.4 Bar   |
| Focus       | Not active | Set Capillary         | 4500 V    | Set Dry Heater   | 180 °C    |
| Scan Begin  | 50 m/z     | Set End Plate Offset  | -500 V    | Set Dry Gas      | 4.0 l/min |
| Scan End    | 800 m/z    | Set Collision Cell RF | 300.0 Vpp | Set Divert Valve | Source    |

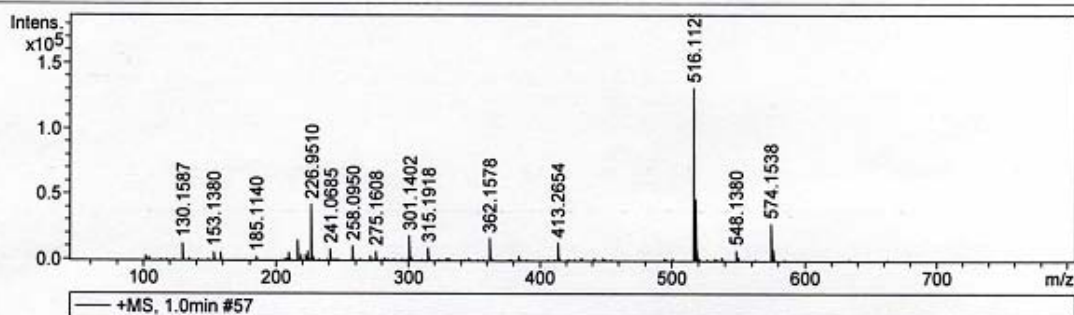

| #  | m/z      | Res.  | S/N    | I      | FWHM   |
|----|----------|-------|--------|--------|--------|
| 1  | 130.1587 | 19565 | 3702.8 | 12985  | 0.0067 |
| 2  | 153.1380 | 20861 | 1410.4 | 6505   | 0.0073 |
| 3  | 158.9634 | 23560 | 1242.7 | 6080   | 0.0067 |
| 4  | 185.1140 | 22473 | 353.7  | 2716   | 0.0082 |
| 5  | 210.1017 | 22286 | 514.6  | 6022   | 0.0094 |
| 6  | 216.9220 | 24040 | 1218.5 | 15599  | 0.0090 |
| 7  | 226.9510 | 23205 | 3058.6 | 42035  | 0.0098 |
| 8  | 241.0685 | 24780 | 634.8  | 8886   | 0.0097 |
| 9  | 258.0950 | 26008 | 774.6  | 11080  | 0.0099 |
| 10 | 275.1608 | 26838 | 486.0  | 7106   | 0.0103 |
| 11 | 301.1402 | 25762 | 1217.3 | 18479  | 0.0117 |
| 12 | 315.1918 | 25033 | 630.7  | 9765   | 0.0126 |
| 13 | 362.1578 | 26300 | 1112.1 | 16847  | 0.0138 |
| 14 | 413.2654 | 25906 | 871.3  | 13610  | 0.0160 |
| 15 | 516.1129 | 22968 | 4478.8 | 131261 | 0.0225 |
| 16 | 517.1155 | 25268 | 1554.5 | 33227  | 0.0205 |
| 17 | 518.1103 | 24109 | 2168.6 | 46836  | 0.0215 |
| 18 | 519.1122 | 26688 | 434.8  | 9488   | 0.0195 |
| 19 | 548.1380 | 27137 | 405.9  | 8097   | 0.0202 |
| 20 | 574.1538 | 26304 | 1791.1 | 28317  | 0.0218 |

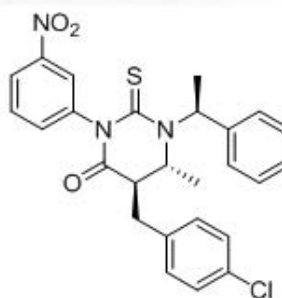

9bii

Exact Mass: 493.1227

[M+Na]<sup>+</sup> = 516.1125



| Entry | Conformation                                                                                            | 3-dimensional representation                                                         | Total Energy<br>Kcal/mol |
|-------|---------------------------------------------------------------------------------------------------------|--------------------------------------------------------------------------------------|--------------------------|
| 01    | 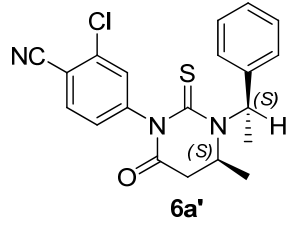 <p><b>6a'</b></p>     |    | -90576.3225              |
| 02    |  <p><b>6a''</b></p>    |    | -90578.7543              |
| 03    |  <p><b>6a'''</b></p>  |   | -90565.4083              |
| 04    |  <p><b>6b'</b></p>   |  | -90575.9313              |
| 05    |  <p><b>6b''</b></p>  |  | -90580.2530              |
| 06    |  <p><b>6b'''</b></p> |  | -90577.8479              |
